# Supplementary material for: Paraplegia prevention in aortic aneurysm repair by thoracoabdominal staging with ‘minimally invasive staged segmental artery coil embolisation’ (MIS²ACE): trial protocol for a randomised controlled multicentre trial
Source: PubMed Central journal article supplement — BMJ Open. 2019 Mar 4;9(3):e025488. doi: 10.1136/bmjopen-2018-025488 (PMC6429943; doi:10.1136/bmjopen-2018-025488), 2019-03-04
Supplement: bmjopen-2018-025488.draft_revisions.pdf [file bmjopen-2018-025488.draft_revisions.pdf]

# BMJ Open

BMJ Open is committed to open peer review. As part of this commitment we make the peer review history of every article we publish publicly available.

When an article is published we post the peer reviewers' comments and the authors' responses online. We also post the versions of the paper that were used during peer review. These are the versions that the peer review comments apply to.

The versions of the paper that follow are the versions that were submitted during the peer review process. They are not the versions of record or the final published versions. They should not be cited or distributed as the published version of this manuscript.

BMJ Open is an open access journal and the full, final, typeset and author-corrected version of record of the manuscript is available on our site with no access controls, subscription charges or pay-per-view fees (<http://bmjopen.bmj.com>).

If you have any questions on BMJ Open's open peer review process please email [info.bmjopen@bmj.com](mailto:info.bmjopen@bmj.com)

# BMJ Open

## Paraplegia Prevention in Aortic Aneurysm Repair by Thoracoabdominal Staging with 'Minimally-Invasive Staged Segmental Artery Coil-Embolization' (MIS<sup>2</sup>ACE): Trial protocol for a Randomized Controlled Multicentre Trial

|                               |                                                                                                                                                                                                                                                                                                                                                                                                                                                                                                                                                                                                                                                                                                                                                                                                                                                                                                                                                                                                                                                                                                                                                              |
|-------------------------------|--------------------------------------------------------------------------------------------------------------------------------------------------------------------------------------------------------------------------------------------------------------------------------------------------------------------------------------------------------------------------------------------------------------------------------------------------------------------------------------------------------------------------------------------------------------------------------------------------------------------------------------------------------------------------------------------------------------------------------------------------------------------------------------------------------------------------------------------------------------------------------------------------------------------------------------------------------------------------------------------------------------------------------------------------------------------------------------------------------------------------------------------------------------|
| Journal:                      | <i>BMJ Open</i>                                                                                                                                                                                                                                                                                                                                                                                                                                                                                                                                                                                                                                                                                                                                                                                                                                                                                                                                                                                                                                                                                                                                              |
| Manuscript ID                 | bmjopen-2018-025488                                                                                                                                                                                                                                                                                                                                                                                                                                                                                                                                                                                                                                                                                                                                                                                                                                                                                                                                                                                                                                                                                                                                          |
| Article Type:                 | Protocol                                                                                                                                                                                                                                                                                                                                                                                                                                                                                                                                                                                                                                                                                                                                                                                                                                                                                                                                                                                                                                                                                                                                                     |
| Date Submitted by the Author: | 17-Jul-2018                                                                                                                                                                                                                                                                                                                                                                                                                                                                                                                                                                                                                                                                                                                                                                                                                                                                                                                                                                                                                                                                                                                                                  |
| Complete List of Authors:     | <p>Petroff, David; University of Leipzig, Clinical Trial Centre<br/>           Czerny, Martin; Universitäts-Herzzentrum Freiburg Bad Krozingen GmbH; Albert-Ludwigs-Universität Freiburg Medizinische Fakultät<br/>           Kölbl, Tilo; University heart center hamburg, Department of Vascular Medicine<br/>           Melissano, Germano; Università Vita Salute San Raffaele, Division of Vascular Surgery<br/>           Lonn, Lars; Rigshospitalet, Department of (Interventional) Radiology<br/>           Haunschild, Josephina; University Heart Center Leipzig, Department of Cardiac Surgery<br/>           von Aspern, Konstantin; University Heart Center Leipzig, Department of Cardiac Surgery<br/>           Neuhaus, Petra; University of Leipzig, Clinical Trial Centre<br/>           Pelz, Johann; Universitätsklinikum Leipzig, Department of Neurology<br/>           EPSTEIN, DAVID; Universidad de Granada - Campus de Cartuja, Economía Aplicada<br/>           Piotrowski, Katja; University of Leipzig, Clinical Trial Centre<br/>           Etz, Christian; University Heart Center Leipzig, Department of Cardiac Surgery</p> |
| Keywords:                     | Thoracoabdominal aortic aneurysms, TAAA, spinal cord injury, SCI, segmental artery coil embolization, MISACE                                                                                                                                                                                                                                                                                                                                                                                                                                                                                                                                                                                                                                                                                                                                                                                                                                                                                                                                                                                                                                                 |
|                               |                                                                                                                                                                                                                                                                                                                                                                                                                                                                                                                                                                                                                                                                                                                                                                                                                                                                                                                                                                                                                                                                                                                                                              |

SCHOLARONE™  
Manuscripts

1  
2  
3 **Paraplegia Prevention in Aortic Aneurysm Repair by Thoracoabdominal**  
4 **Staging with ‘Minimally-Invasive Staged Segmental Artery Coil-**  
5 **Embolization’ (MIS<sup>2</sup>ACE): Trial protocol for a Randomized Controlled**  
6 **Multicentre Trial**  
7  
8  
9

10 David Petroff,<sup>1</sup> Martin Czerny,<sup>2,3</sup> Tilo Kölbel,<sup>4</sup> Germano Melissano,<sup>5</sup> Lars Lonn,<sup>6</sup> Josephina  
11 Haunschild,<sup>7</sup> Konstantin von Aspern,<sup>7</sup> Petra Neuhaus,<sup>1</sup> Johann Pelz,<sup>8</sup> David Epstein,<sup>9</sup> Katja  
12 Piotrowski,<sup>1</sup> Christian D Etz<sup>7</sup>  
13  
14  
15

16 <sup>1</sup> Clinical Trial Centre, University of Leipzig, Germany

17 <sup>2</sup> University Heart Center Freiburg-Bad Krozingen, Germany

18 <sup>3</sup> Faculty of Medicine, Albert Ludwigs University Freiburg, Germany

19 <sup>4</sup> German Aortic Center Hamburg, Department of Vascular Medicine, University Heart  
20 Center, Hamburg, Germany

21 <sup>5</sup> Division of Vascular Surgery, "Vita-Salute" University, IRCCS San Raffaele Scientific  
22 Institute, Milan, Italy

23 <sup>6</sup> Department of (Interventional) Radiology, Rigshospitalet, National Hospital and University  
24 of Copenhagen, Denmark

25 <sup>7</sup> Department of Cardiac Surgery, University Heart Center Leipzig, Germany

26 <sup>8</sup> Department of Neurology, Leipzig University Hospital, Germany

27 <sup>9</sup> Department of Applied Economics, University of Granada, Spain.  
28  
29  
30  
31  
32  
33  
34  
35

36 **Corresponding author:**

37  
38 David Petroff (for the journal and questions regarding trial design)

39 Clinical Trial Centre, University of Leipzig

40 Haertelstr. 16-18, 04107 Leipzig, Germany

41 +49 341 9716354

42 [David.Petroff@zks.uni-leipzig.de](mailto:David.Petroff@zks.uni-leipzig.de)  
43  
44

45 Christian Etz (for medical questions)

46 [Chrsitian.Etz@medizin.uni-leipzig.de](mailto:Chrsitian.Etz@medizin.uni-leipzig.de)  
47  
48

49 **Word count:** 3956

50  
51 **Keywords:** Thoracoabdominal aortic aneurysms, TAAA, spinal cord injury, SCI, segmental  
52 artery coil embolization, MISACE  
53  
54  
55  
56  
57  
58  
59

## ABSTRACT

**Introduction** Spinal cord injury (SCI) including permanent paraplegia constitute a common complication after repair of thoracoabdominal aortic aneurysms. The staged-repair concept promises to provide protection by inducing arteriogenesis so that the collateral network can provide a robust blood supply to the spinal cord after intervention. Minimally invasive staged segmental artery coil embolization (MIS<sup>2</sup>ACE) has been proved recently to be a feasible enhanced approach to staged repair.

**Methods and analysis** This RCT uses a multi-centre, multinational, parallel group design, where 500 patients will be randomized in a 1:1 ratio to standard aneurysm repair or to MIS<sup>2</sup>ACE in 1-3 sessions followed by repair. Before randomization, physicians document whether open or endovascular repair is planned. The primary endpoint is successful aneurysm repair without substantial SCI 30 days after aneurysm repair. Secondary endpoints include any form of SCI, mortality (up to one year), length of stay in ICU, costs and quality of life adjusted years (QALYs). A generalized linear mixed model will be used with the logit link function and randomization arm, mode of repair (open or endovascular repair), the Crawford type and the euroSCORE II as fixed effects and the centre as a random effect. Safety endpoints include kidney failure, respiratory failure and embolic events (also from debris).

**Ethics and dissemination** This trial has been approved by the lead Ethics Committee from the University of Leipzig (435/17-ek) and will be reviewed by each of the Ethics Committees at the trial sites. A dedicated project is coordinating communication and dissemination of the trial.

**Trial registration number** NCT03434314

### Strengths and limitations of this study

- Large multicentre randomized controlled trial RCT in aortic surgery addressing a fundamental issue in thoracoabdominal aortic aneurysm TAAA repair
- Includes open and endovascular repair
- Provides 1-year data on SCI and mortality
- Looks at potential reductions in bleeding complications and endoleaks
- Cannot be blinded

## INTRODUCTION

This publication describes the study design and protocol of a clinical trial on Paraplegia Prevention in Aortic Aneurysm Repair by Thoracoabdominal Staging (“PAPAartis”) and follows the SPIRIT recommendations very closely (“Standard Protocol Items: Recommendations for Interventional Trials”).[1, 2]

### Background

Aortic aneurysms are permanent and localized dilations of particular portions of the aorta that grow unpredictably, but with a mean estimated rate of about two millimetres per year[3] and remain asymptomatic for long periods of time. Based on the aneurysm localization, one can distinguish between thoracic, abdominal and thoracoabdominal aortic aneurysms (TAAA). The latter are complex and generally categorized according to the Crawford classification (type I-IV), based on the anatomic extent of the aneurysm.[4–6]

A study comparing a historic cohort to a matched treated population showed that the dismal five-year survival rate of 13% given the natural course of the disease could be increased to 61% with open surgical repair.[7] Although successful aortic repair cures the disease, both open and endovascular modalities can result in paraplegia from spinal cord ischaemia and mortality is high. This particularly affects patients with aneurysms extending from the thoracic to the abdominal aorta and thus involving many segmental arteries (SAs) supplying the spinal cord. It has been assumed that paraplegia in open repair arises primarily due to temporary interruption of spinal cord blood supply during the operative procedure with a duration sufficient to damage cell bodies and nerve tracts in the spinal cord irreversibly. In endovascular repair, the chronic occlusion of several segmental arteries (as well as the temporary compromising of internal iliac blood supply during the procedure) induces paraplegia with a comparable incidence.[8] Various adjunctive perioperative neuroprotective strategies, such as motor/somatosensory evoked potential monitoring, meticulous perioperative blood pressure management, cerebrospinal fluid (CSF) drainage and even local spinal cord cooling, have been introduced to minimize ischaemic spinal cord injury (SCI).[9] These methods have achieved a notable decrease in the incidence of paraplegia and paraparesis, but it remains high with an incidence of up to 20% for Crawford type II aneurysms.[10]

### Rationale

1  
2  
3 Members of the study team have found that the deliberate staged occlusion of segmental  
4 arteries leading to the paraspinous collateral network and finally supplying the spinal cord can  
5 trigger arterial collateralization, thus stabilizing blood supply to the spinal cord from alternate  
6 inflow sources and potentially preventing ischaemia.[11–16] This approach was devised after  
7  
8 35 years of research that included recognition of the body’s ability to tolerate segmental artery  
9 sacrifice[17] given haemodynamic stability[18, 19] along with the identification of the  
10 paraspinous arterial collateral network itself.[12, 16] One means of occluding arteries in the  
11 clinical setting has been termed ‘minimally invasive staged segmental artery coil  
12  
13  
14  
15  
16 40 embolization’ (MIS<sup>2</sup>ACE), which was proved feasible in 2015.[20]

### 17 18 **Objectives**

19  
20 The primary objective of the PAPAartis trial is to demonstrate that MIS<sup>2</sup>ACE can greatly  
21 reduce the incidence of ischaemic SCI and mortality compared to standard open surgical or  
22 endovascular thoracoabdominal aneurysm repair alone.  
23  
24

### 25 26 45 **Trial Design**

27  
28 PAPAartis is a multi-national, open label, randomized controlled trial. It has two parallel  
29 groups with equal allocation and the primary endpoint is to be tested in a superiority  
30 framework.  
31  
32  
33  
34  
35  
36  
37  
38  
39  
40  
41  
42  
43  
44  
45  
46  
47  
48  
49  
50  
51  
52  
53  
54  
55  
56  
57  
58  
59  
60

## METHODS AND ANALYSIS

### 50 Study setting

To demonstrate the efficacy of MIS<sup>2</sup>ACE while minimizing risks, we chose participating sites with great expertise in the treatment of TAAA and tried to create a balance between those specializing in open and those in endovascular repair. The trial is jointly funded by the European Union as part of the Horizon 2020 programme and by the German Research Foundation, resulting in sites exclusively in Europe and with a strong emphasis on Germany. The recruiting sites (n=29) at commencement of the trial come from Austria (n=2), France (n=2), Germany (n=16), Italy (n=2), the Netherlands (n=1), Poland (n=2), Sweden (n=2), Switzerland (n=1) and the United Kingdom (n=1). In addition, Denmark provides an independent radiological core unit, Spain heads projects on health economics and patient satisfaction, the USA provide expert advice and Scotland heads a project on communication and dissemination. Patient recruitment will begin imminently and is planned to last two years.

### Eligibility criteria

#### *Inclusion criteria*

1. TAAA, Crawford type II or III (verified by radiological core unit)
- 65 2. planned open or endovascular repair of aneurysm within four months
3. ≥ 18 years old

The inclusion criteria are chosen to select a high risk (Crawford type II and III) population amenable to MIS<sup>2</sup>ACE therapy.

#### *Key exclusion criteria*

- 70 1. complicated (sub-) acute type B aortic dissection (but all chronic type B dissections will be included)
2. ruptured and urgent aneurysm (emergencies)
3. untreated aortic arch aneurysm (patients with a previous successful aortic arch aneurysm repair may be included independent of technique used)
- 75 4. bilaterally occluded iliac arteries or chronic total occlusion of left subclavian artery
5. pre-operative neurological deficits or spinal cord dysfunction
6. major untreated cardio-pulmonary disease
7. life-expectancy of less than one year
8. high risk for segmental artery embolism ('shaggy' aorta)

1  
2  
3 80 9. severe contrast agent allergy, severe reduction in glomerular filtration rate  
4

5 The first two exclusion criteria were chosen since patients should not be subjected to  
6 additional risk as a result of the waiting time in the MIS<sup>2</sup>ACE arm before TAAA repair can be  
7 performed. The third exclusion criterion was chosen since these patients have considerable  
8 risk unrelated to the focus of the trial. Exclusion criterion 4 was chosen, since sufficient blood  
9  
10 supply after MIS<sup>2</sup>ACE cannot be guaranteed on the one hand, and the prior occlusion implies  
11 85 that no additional treatment options are available in this anatomic region.  
12  
13  
14

### 15 **Intervention**

16  
17 An overview of the trial is provided in Fig. 1. The treating physicians choose the mode of  
18 repair, after which the patient is randomized to the interventional or the control arm.  
19  
20

21 90 In the interventional arm (MIS<sup>2</sup>ACE), segmental arteries will be occluded in one to three  
22 sessions some weeks before the aneurysm repair. Target SAs for coil/plug deployment will be  
23 identified considering the extent of the planned repair and individual SA anatomy. The  
24 occlusion of up to 7 SAs will be performed in a single session and conducted through a  
25 peripheral artery access (e.g. the common femoral artery) in local anaesthesia. Local  
26 anaesthesia is important so that patients can provide immediate feedback regarding potential  
27 neurological symptoms. Selected SAs will be catheterized (e.g. with a 5F catheter or 2.7F  
28 microcatheter). Microcoils or vascular plugs will be used for the occlusion itself, not however  
29 particles, which could cause unwanted microembolisms to the spinal cord directly. This will  
30 95 be performed in the proximal SA to ensure that the collateral network itself is not affected.  
31  
32  
33  
34  
35  
36

37 100 The procedure may be done without spinal fluid drainage but is left at the discretion of the  
38 centre. The length of the procedure, the amount of contrast dye and the dose of radiation will  
39 be documented exactly. The recommended interval between sessions is 21 days, with a strict  
40 safety minimum of 5 days.[11] Experts in endovascular catheterization in small vessels (e.g.  
41 cardiovascular surgeons, interventionalists, endovascular surgeons, interventional  
42 radiologists, paediatric cardiologists) will perform MIS<sup>2</sup>ACE. It is essential to maintain the  
43 individual patient's blood pressure during and after the procedure (invasive monitoring) and  
44 ensure that hypotensive periods are carefully avoided. Therefore, the patient should stay in  
45 IMCU for at least 48 hours, preferably longer. Reduction or even interruption of oral anti-  
46 hypertensive medication and use of low-dose vasopressors may be utilized and are preferable  
47  
48  
49  
50  
51 110 to volume therapy, which increases central venous pressure and thereby also CSF pressure.  
52  
53  
54  
55  
56  
57  
58  
59  
60



1  
2  
3 In the control arm, patients will be treated according to the optimal state-of-the art procedures  
4 at the local site. This ensures a real-world comparison in which the control arm is as strong as  
5 possible.  
6  
7

## 8 **Endpoints**

### 10 115 *Primary endpoint*

12 The primary endpoint is successful treatment of the aneurysm. We define “success” as (a) the  
13 patient is alive and without substantial SCI 30 days after treatment, and (b) the aneurysm did  
14 not rupture and has been excluded within six months of randomization.  
15  
16  
17

18 Patients, who have not been treated within six months of randomization will be treated as  
19 failures to ensure that success/failure is defined for all randomized patients. During  
20 120 recruitment, the Trial Steering Committee will ensure that time lapse alone leads only very  
21 rarely to failure, otherwise this criterion will be reworked. The definition of success  
22 pertaining to mortality and SCI will be assessed 30 days after TAAA repair and “substantial  
23 SCI” means that the patient is unable to stand without assistance and is specifically defined  
24 using a modified Tarlov scale[21] and assessed by a board certified neurologist whenever  
25 125 possible. Treatment success for open repair is defined by complete resection and graft  
26 replacement in the absence of major related complications.  
27  
28  
29  
30  
31  
32

### 33 *Secondary endpoints*

34  
35 For secondary endpoints, treatment success will be assessed and based on follow-up CT/MR  
36 130 images. Treatment success for endovascular repair is defined based on the position paper of  
37 the European Association for Cardio-Thoracic Surgery (EACTS) and the European Society of  
38 Cardiology (ESC), in collaboration with the European Association of Percutaneous  
39 Cardiovascular Interventions (EAPCI)[22] and takes into account upcoming guideline papers.  
40 Failure is defined as substantial progression of the aneurysm sac (> 3mm) or the presence of  
41 135 major related complications (e.g. type I/III endoleaks). Completion angiography and/or  
42 follow-up MRI/CT from patients with endovascular repair will be conducted as part of  
43 clinical routine and will be sent to Copenhagen for assessment.  
44  
45  
46  
47  
48  
49  
50

51 Note: The point in time “one year” refers to one year after TAAA repair. If patients retained  
52 in the full analysis set have not had a repair, then “30 days after TAAA repair” and “at one  
53 140 year” will be treated as 30 days and one year after randomization.  
54  
55

- 56 1. Substantial SCI at 30 days after TAAA repair and at one year

2. SCI according to the modified Tarlov scale from TAAA repair treatment to one year
3. All-cause mortality at 30 days and one year after TAAA repair
4. Length of stay in intensive care unit and intermediate care unit after TAAA repair
- 145 5. Sub-group analyses for open repair and endovascular repair separately
6. Re-operation for bleeding and drainage volumes in the first 24 h and use of blood products (only for open repair)
7. Cross-clamping times during open surgery
8. Residual aneurysm sac perfusion, i.e. type II endoleaks (only for endovascular repair)
- 150 9. Health-related quality of life will be collected using the WHOQOL-BREF[23] and the EuroQoL EQ-5D-5L instruments.[24] Hospital and other healthcare resource use will be collected. Healthcare costs, quality-adjusted life years (QALYs) and the incremental cost-effectiveness ratio (ICER) over one year will be calculated.[25]

#### *Safety endpoints*

- 155 Beyond AE/SAE reporting and descriptive statistics on radiation exposure, the following issues will receive special attention: kidney failure, respiratory failure and embolic events (also from debris).

#### **Participant timeline**

Please refer to Fig. 1 for details of the visit schedule and participant timeline.

#### 160 **Sample size**

Estimates of effect size are difficult for several reasons. Foremost, there are large discrepancies between outcome rates quoted in the literature. Moreover, the impact of very recent improvements in techniques on outcomes cannot yet be quantified accurately and, finally the effect size depends on the improvement due to the trial intervention, which, in turn, depends on anatomy, post-repair management and other complex factors. Taking a random effects model of the data from large recent publications for open[10, 26–28] and endovascular repair[29–31] one finds an estimated incidence of 18% (95% prediction interval 15% to 23%) for open repair and a very uncertain 24% (2 to 79)% for endovascular repair. The prediction interval as opposed to the confidence interval provides the correct bounds for what can be expected in the trial.[32] The resources and time available to the study allow for the recruitment of 500 patients. Assuming success rates of 80% in the control arm and 90% in the intervention arm and using a group-sequential design[33] with two interim analyses, this then implies a power of just over 87%.[34] The definitions of the primary endpoint and the full analysis set imply that only very few dropouts are to be expected for this analysis and that

1  
2  
3 175 compliance will not be a problem. The severity of the therapy and recovery times mean that  
4 loss to follow-up is not expected to be a major factor.  
5

### 6 7 **Randomization**

8  
9 Patients will be randomized in a 1:1 ratio to the intervention and control arms with a random  
10 number generator. Randomization will be performed online at the recruitment centres with a  
11  
12 180 tool prepared and hosted by the Clinical Trial Centre Leipzig  
13

14 Some of the centres are expected to recruit a very small number of patients, meaning that  
15 block randomization stratified by centre is unfeasible. Although minimization schemes could  
16 be used to attain roughly balanced allocation of patients, even at the centre level, there is  
17 controversy about the methods needed to analyse such trials. To avoid potential complexities  
18  
19  
20  
21 185 in analysis, we have thus opted for a very simple randomization scheme, knowing that small  
22 imbalances in the number of patients per arm are to be expected.  
23

### 24 25 **Selected data collection methods**

26  
27 Neurological examinations will be performed by board certified neurologists whenever  
28 possible. If such an examination is made upon discharge and no signs of impairment are  
29  
30 190 found, then verification that this holds at 30 days is only required by telephone. Any signs of  
31 impairment necessitate a full examination at 30 days however.  
32

33  
34 If the assessment of Crawford classification or successful treatment carried out by the  
35 radiological unit in Copenhagen should disagree with the treating physician's opinion, the  
36 blinded independent Endpoint Committee will make the final decision. The definition of  
37  
38  
39 195 success does not necessarily require that the MRI/CT be made within six months of  
40 randomization. Later verification of success is acceptable.  
41

### 42 43 **Data management**

44  
45 The EDC tool SecuTrial®, developed and distributed by interActive Systems GmbH, is used  
46 for creation of the study database. Data entry uses eCRF data entry masks and data changes  
47  
48 200 are tracked automatically including date, time and person who entered/changed information  
49 (audit trail). Major corrections or major missing data have to be explained.  
50

51  
52 The information entered into the eCRF by the investigator or an authorised member of the  
53 study team is systematically checked for completeness, consistency and plausibility by  
54 routines implemented in the database, such that discrepancies can be dealt with at data entry.  
55  
56  
57 205 Errors and warnings are listed in a validation report and can be resolved at any time during  
58  
59

1  
2  
3 the data entry process. On completion of data entry, the site staff flags the eCRF-pages as  
4 'data entry completed'.  
5

6  
7 Throughout the study, a backup of all data is made on a daily basis. Unauthorised access to  
8 patient data is prevented by the access concept of the study database, which is based on strict  
9  
10 210 file system permission.

11  
12 At the end of the study, once the database is complete and accurate, the database will be  
13 locked. Subsequent changes to the database are possible only by joint written agreement  
14 between co-ordinating investigator, trial statistician and data manager.  
15  
16  
17  
18

## 19 215 **Statistical methods**

### 20 21 *Analysis Sets*

22  
23 If patients retract informed consent before any procedure is performed (repair or SA  
24 occlusion), they will be excluded from the primary analysis, since we expect some control  
25 arm patients to be dissatisfied with their assigned treatment, retract consent, and seek  
26  
27 220 MIS<sup>2</sup>ACE outside of the trial. Including them would be anti-conservative. The full analysis  
28 set (FAS) includes all randomized patients that have had a session for occluding segmental  
29 arteries (intervention arm) or have had a repair procedure (conventional arm). Randomized  
30 patients whose aneurysm ruptures or who die from any cause will be included in the FAS,  
31 irrespective of the above stipulations.  
32  
33  
34  
35  
36

37 225 If a sufficiently large number of patients violate the trial protocol, particularly regarding the  
38 trial intervention, then a per protocol analysis will be performed using the set of patients that  
39 conformed to the major terms in the protocol. A precise definition of the per protocol set will  
40 be provided in the statistical analysis plan.  
41  
42  
43

44  
45 Patients are generally analysed regarding safety according to treatment received. In our case,  
46 230 an undue delay between randomization and treatment is a risk factor, meaning that such  
47 patients will be included in the safety analyses even if they have not yet received treatment.  
48  
49

### 50 *Statistical Analysis*

51  
52 The primary analysis is based on the FAS and makes use of a generalized linear mixed model  
53 with the logit link function. The success/failure of treatment will be the dependent variable.  
54

55 235 The assigned randomization arm, mode of repair (open or endovascular repair), the Crawford  
56 type and the euroSCORE II are fixed effects and the centre will be treated as a random effect.  
57  
58  
59

1  
2  
3 The euroSCORE II already takes age, sex and other relevant factors into account. The  
4 interaction term between the randomization arm and the other fixed effects will only be  
5 included if evidence for a strong interaction effect are seen, since this would otherwise lead to  
6 a substantial loss of power.[35, 36] As a supplementary analysis, an analogous mixed model  
7 240 will be performed with a unity link function to provide estimates and confidence intervals for  
8 absolute risk differences.  
9  
10  
11

12  
13 The definitions of the full analysis set and the primary endpoint are chosen so that almost no  
14 missing data are expected. If success cannot be ascertained with certainty, the patient will be  
15 245 treated as a failure. Sensitivity analyses will be used to gauge the effect of missing data on the  
16 estimates and conclusions drawn.  
17  
18  
19

20  
21 Analysis of binary secondary outcomes will be treated on the same footing as the primary  
22 analysis. Mortality at 30 days will be treated as binary as opposed to time-to-event, since  
23 prolonging life in the post-operative phase for a matter of days is not considered clinically  
24 250 relevant. Subgroup analyses of the two Crawford types and of the two modes of repair will be  
25 presented in the form of contingency tables. Mixed model Cox regression with covariates  
26 euroSCOREII, Crawford type and mode of repair will be used for one-year mortality with  
27 randomization arm as the independent variable of interest and centre as a random effect. If the  
28 assumption of proportional hazards is violated substantially, a logistic regression will be used.  
29  
30  
31  
32  
33 255 Kaplan-Meier curves will be used to represent the data.  
34

35  
36 In explorative analyses, the number of patent segmental arteries and the number occluded will  
37 be taken into account with respect to SCI and mortality. The anatomical position of the  
38 segmental arteries may also be used.  
39  
40

41  
42 ICU-time and ICMU-time will be analysed with a linear mixed effects model with the same  
43 260 fixed and random effects as in the primary analysis and may be log transformed if warranted.  
44 Re-operation for bleeding and type II endoleaks will be presented for the subgroups of  
45 patients treated with open or endovascular repair, respectively.  
46  
47

48  
49 Descriptive statistics will be used for further safety outcomes along with odds ratios  
50 according to treatment received, as appropriate.  
51

52 265 Total mean cost per patient over one year will be estimated by multiplying healthcare  
53 resource use collected in the trial by unit costs from the country health system.[37] QALYs  
54 will be calculated in each treatment group using the EQ-5D-5L value set.[38] The ICER will  
55 be calculated, and will inform whether MIS<sup>2</sup>ACE is cost-effective on average for patients with  
56  
57  
58  
59

1  
2  
3 TAAA Crawford type II or III. Bootstrap methods will be used to characterize  
4 270 uncertainty.[25]  
5

6 Further details will be provided in a statistical analysis plan.  
7

### 8 **Statistical monitoring**

9  
10 The trial conduct will be closely supervised by means of central and statistical monitoring.  
11 The objectives are a) to detect safety relevant signals as soon as possible, b) to detect non-  
12 275 compliance and relevant protocol violations and to prevent their future occurrence by prompt  
13 reaction, c) to prevent missing visits or measurements by prompt reminders and d) to explore  
14 means of improving on the MISACE procedure.  
15  
16  
17  
18

19 Statistical and central monitoring will start immediately after inclusion of the first patient. The  
20 relevant reports and descriptive statistics will be updated and discussed at the regular  
21 280 meetings of the Leipzig study team. Problems and abnormalities will be presented at regular  
22 intervals to the co-ordinating investigator.  
23  
24  
25

### 26 **On-site monitoring**

27  
28 A risk-based monitoring strategy will be implemented as required by ICH E6 (Chapter 5.0)  
29 According to the risk analysis, treatment delivery parameters, adverse events, follow-up  
30 285 information, data transmission and protection and informed consent documents comprise risk-  
31 bearing trial aspects and will be monitored.  
32  
33  
34  
35

36 Prior to recruitment, each participating centre will receive a site initiation visit, during which  
37 the trial protocol (if necessary) and the eCRFs will be reviewed with centre staff and any  
38 necessary training will be provided. During the study, trial monitors will maintain regular  
39 290 contact with trial centre staff (by telephone/fax/email /post) to track the progress of the trial,  
40 respond to any problems, and provide general assistance and support.  
41  
42  
43  
44

45 The first regular monitoring visit at a site will take place after the randomization of the site's  
46 first patient to check protocol compliance and to prevent further systematic errors due to  
47 misunderstandings. Trial site visits will take place on a regular basis. The frequency of  
48 295 monitoring visits will depend on the trial site's recruitment rate as well as on potential  
49 problems detected during previous on-site visits or by central monitoring.  
50  
51  
52

53 Prior to every scheduled on-site visit, the monitor will receive summaries of the site's patient  
54 data already documented in the database, and if applicable with data indicating possible  
55 protocol deviations or inconsistencies. During the visits, the monitor will a) check informed  
56  
57  
58  
59

1  
2  
3 300 consent forms of all patients enrolled, b) perform source data verification of key data in a  
4 random sample of at least 20% of the site's patients, c) perform targeted source data  
5 verification for patients with possible deviations, d) discuss open queries raised by data  
6 management or drug safety personnel, e) check essential parts of the investigator site file, f)  
7 check source data for AEs or SAEs, which have not been properly reported in the CRF/eCRF  
8 and g) check for major GCP-breaches and/or protocol violations.  
9  
10 305  
11

### 12 **Harms**

13  
14  
15 Safety endpoints related directly to MIS<sup>2</sup>ACE include kidney failure, respiratory failure and  
16 embolic events (also from debris). These endpoints will be listed according to treatment  
17 received with a breakdown according to the number of MIS<sup>2</sup>ACE sessions. In addition, data  
18 on radiation exposure will be collected and presented descriptively.  
19  
20 310  
21  
22  
23  
24  
25  
26  
27  
28  
29  
30  
31  
32  
33  
34  
35  
36  
37  
38  
39  
40  
41  
42  
43  
44  
45  
46  
47  
48  
49  
50  
51  
52  
53  
54  
55  
56  
57  
58  
59  
60



## ETHICS AND DISSEMINATION

### Approval and registration

315 The trial protocol and the informed consent form have been reviewed and approved by the lead Ethics Committee from the University of Leipzig (435/17-ek) and will be reviewed by each of the Ethics Committees at the trial sites. The Federal Office for Radiation Protection in Germany has also approved the additional radiation use in the intervention group (Z5-22462/2 – 2017-073). The trial has been registered with clinicaltrials.gov (NCT03434314)

### External boards

320 A Data Monitoring Committee (DMC) has been established to oversee patient safety and data quality in the trial. It consists of three members with expertise in aortic surgery, neurology and medical statistics. The DMC will convene at regular intervals after first-patient-in and will provide recommendations after the interim analyses as to how to proceed with the trial.

325 An expert advisory board consisting of four international experts on TAAA repair provide the active trial members with independent advice regarding trial design and conduct. It meets with leading members of the consortium on an annual basis and is kept abreast of the trial's progress.

### Dissemination

330 One project partner (MODUS Research and Innovation, Edinburgh, Scotland) has a project dedicated to communication and dissemination. Key channels, tools and target audiences for dissemination and use of project results will be identified in a Communication and Dissemination Plan. The dissemination activities will be two-fold: basic communication about the project to the public and specific dissemination to four target communities. One objective of the dissemination plan will be to support the project partners with the clinical recruitment.

335 The other objective will be to reach out to wide audiences outside the project consortium at national, European and international levels (medical and health professionals, academics, medical and biomedical industries, policy makers, EU regulators (e.g. the European Medicines Agency), patients group, health NGOs, civil societies, scientific and lay media. The dissemination vehicles will be seminars, medical conferences and publications, project partners' individual communication streams. Dissemination material may include a project leaflet, newsletter, press releases and a trial website.

340



**REFERENCES**

- 1 Chan A-W, Tetzlaff JM, Altman DG, et al. SPIRIT 2013 statement: Defining standard protocol items for clinical trials. *Ann Intern Med* 2013;158(3):200–07.
- 345 2 Chan A-W, Tetzlaff JM, Gøtzsche PC, et al. SPIRIT 2013 explanation and elaboration: Guidance for protocols of clinical trials. *BMJ* 2013;346:e7586.
- 3 Elefteriades JA. Natural history of thoracic aortic aneurysms: Indications for surgery, and surgical versus nonsurgical risks. *Ann Thorac Surg* 2002;74(5):S1877-S1880.
- 4 Crawford ES, Crawford JL, Safi HJ, et al. Thoracoabdominal aortic aneurysms: preoperative and intraoperative factors determining immediate and long-term results of operations in 605 patients. *J Vasc Surg* 1986;3(3):389–404.
- 350 5 Elefteriades JA. Thoracic aortic aneurysm: reading the enemy's playbook. *Curr Probl Cardiol* 2008;33(5):203–77.
- 6 Frederick JR, Woo YJ. Thoracoabdominal aortic aneurysm. *Ann Cardiothorac Surg* 2012;1(3):277–85.
- 355 7 Miller C3, Porat EE, Estrera AL, et al. Number needed to treat: analyzing of the effectiveness of thoracoabdominal aortic repair. *Eur J Vasc Endovasc Surg* 2004;28(2):154–57.
- 8 Greenberg RK, Lu Q, Roselli EE, et al. Contemporary analysis of descending thoracic and thoracoabdominal aneurysm repair: a comparison of endovascular and open techniques. *Circulation* 2008;118(8):808–17.
- 360 9 Etz CD, Weigang E, Hartert M, et al. Contemporary spinal cord protection during thoracic and thoracoabdominal aortic surgery and endovascular aortic repair: a position paper of the vascular domain of the European Association for Cardio-Thoracic Surgerydagger. *Eur J Cardiothorac Surg* 2015;47(6):943–57.
- 365 10 Conrad MF, Crawford RS, Davison JK, et al. Thoracoabdominal Aneurysm Repair: A 20-Year Perspective. *Ann Thorac Surg* 2007;83(2):S856-S861.
- 11 Etz CD, Luehr M, Kari FA, et al. Spinal cord perfusion after extensive segmental artery sacrifice: can paraplegia be prevented? *Eur J Cardiothorac Surg* 2007;31(4):643–48.
- 370 12 Etz CD, Kari FA, Mueller CS, et al. The collateral network concept: remodeling of the arterial collateral network after experimental segmental artery sacrifice. *J Thorac Cardiovasc Surg* 2011;141(4):1029–36.
- 13 Zoli S, Etz CD, Roder F, et al. Experimental two-stage simulated repair of extensive thoracoabdominal aneurysms reduces paraplegia risk. *Ann Thorac Surg* 2010;90(3):722–29.
- 375 14 Luehr M, Salameh A, Haunschild J, et al. Minimally invasive segmental artery coil embolization for preconditioning of the spinal cord collateral network before one-stage descending and thoracoabdominal aneurysm repair. *Innovations (Phila)* 2014;9(1):60–65.
- 380 15 Geisbusch S, Stefanovic A, Koruth JS, et al. Endovascular coil embolization of segmental arteries prevents paraplegia after subsequent thoracoabdominal aneurysm repair: an experimental model. *J Thorac Cardiovasc Surg* 2014;147(1):220–26.
- 16 Etz CD, Kari FA, Mueller CS, et al. The collateral network concept: A reassessment of the anatomy of spinal cord perfusion. *J Thorac Cardiovasc Surg* 2011;141(4):1020–28.

- 1  
2  
3 385 17 Etz CD, Halstead JC, Spielvogel D, et al. Thoracic and thoracoabdominal aneurysm  
4 repair: is reimplantation of spinal cord arteries a waste of time? *Ann Thorac Surg*  
5 2006;82(5):1670–77.  
6  
7 18 Etz CD, Homann TM, Luehr M, et al. Spinal cord blood flow and ischemic injury after  
8 experimental sacrifice of thoracic and abdominal segmental arteries. *Eur J Cardiothorac*  
9 390 *Surg* 2008;33(6):1030–38.  
10  
11 19 Etz CD, Luehr M, Kari FA, et al. Paraplegia after extensive thoracic and  
12 thoracoabdominal aortic aneurysm repair: does critical spinal cord ischemia occur  
13 postoperatively? *J Thorac Cardiovasc Surg* 2008;135(2):324–30.  
14  
15 20 Etz CD, Debus ES, Mohr F-W, et al. First-in-man endovascular preconditioning of the  
16 395 paraspinal collateral network by segmental artery coil embolization to prevent ischemic  
17 spinal cord injury. *J Thorac Cardiovasc Surg* 2015;149(4):1074–79.  
18  
19 21 Chiesa R, Melissano G, Marrocco-Trischitta MM, et al. Spinal cord ischemia after  
20 elective stent-graft repair of the thoracic aorta. *J Vasc Surg* 2005;42(1):11–17.  
21  
22 22 Grabenwöger M, Alfonso F, Bachet J, et al. Thoracic Endovascular Aortic Repair  
23 400 (TEVAR) for the treatment of aortic diseases: A position statement from the European  
24 Association for Cardio-Thoracic Surgery (EACTS) and the European Society of  
25 Cardiology (ESC), in collaboration with the European Association of Percutaneous  
26 Cardiovascular Interventions (EAPCI). *Eur J Cardiothorac Surg* 2012;42(1):17–24.  
27  
28 23 THE WHOQOL GROUP. Development of the World Health Organization WHOQOL-  
29 405 BREF Quality of Life Assessment. *Psychological Medicine* 1998;28(3):551–58.  
30  
31 24 Janssen MF, Pickard AS, Golicki D, et al. Measurement properties of the EQ-5D-5L  
32 compared to the EQ-5D-3L across eight patient groups: A multi-country study. *Qual*  
33 *Life Res* 2013;22(7):1717–27.  
34 [https://www.ncbi.nlm.nih.gov/pmc/articles/PMC3764313/pdf/11136\\_2012\\_Article\\_322.](https://www.ncbi.nlm.nih.gov/pmc/articles/PMC3764313/pdf/11136_2012_Article_322.pdf)  
35 410 [pdf](https://www.ncbi.nlm.nih.gov/pmc/articles/PMC3764313/pdf/11136_2012_Article_322.pdf).  
36  
37 25 Ramsey SD, Willke RJ, Glick H, et al. Cost-effectiveness analysis alongside clinical  
38 trials II-An ISPOR Good Research Practices Task Force report. *Value Health*  
39 2015;18(2):161–72.  
40  
41 26 Fehrenbacher JW, Siderys H, Terry C, et al. Early and late results of descending thoracic  
42 415 and thoracoabdominal aortic aneurysm open repair with deep hypothermia and  
43 circulatory arrest. *J Thorac Cardiovasc Surg* 2010;140(6, Supplement):S154-S160.  
44  
45 27 Zoli S, Roder F, Etz CD, et al. Predicting the Risk of Paraplegia After Thoracic and  
46 Thoracoabdominal Aneurysm Repair. *Ann Thorac Surg* 2010;90(4):1237–45.  
47  
48 28 Coselli JS, LeMaire SA, Preventza O, et al. Outcomes of 3309 thoracoabdominal aortic  
49 420 aneurysm repairs. *J Thorac Cardiovasc Surg* 2016;151(5):1323–37.  
50  
51 29 Katsargyris A, Oikonomou K, Kouvelos G, et al. Spinal cord ischemia after  
52 endovascular repair of thoracoabdominal aortic aneurysms with fenestrated and  
53 branched stent grafts. *J Vasc Surg* 2015;62(6):1450–56.  
54  
55 30 Bisdas T, Panuccio G, Sugimoto M, et al. Risk factors for spinal cord ischemia after  
56 425 endovascular repair of thoracoabdominal aortic aneurysms. *J Vasc Surg*  
57 2015;61(6):1408–16.  
58  
59

- 1  
2  
3 31 Dias NV, Sonesson B, Kristmundsson T, et al. Short-term outcome of spinal cord  
4 ischemia after endovascular repair of thoracoabdominal aortic aneurysms. *European*  
5 *Journal of Vascular and Endovascular Surgery* 2015;49(4):403–09.  
6  
7 430 32 Riley RD, Higgins JPT, Deeks JJ. Interpretation of random effects meta-analyses. *BMJ*  
8 2011;342:d549.  
9  
10 33 O'Brien PC, Fleming TR. A multiple testing procedure for clinical trials. *Biometrics*  
11 1979;35(3):549–56.  
12  
13 435 34 Hintze J. PASS. NCSS, LLC. Kaysville, Utah, USA.: PASS 11 2011.  
14 35 Aitkin M. The Analysis of Unbalanced Cross-Classifications. *Journal of the Royal*  
15 *Statistical Society. Series A (General)* 1978;141(2):195.  
16  
17 36 Nelder JA. A Reformulation of Linear Models. *Journal of the Royal Statistical Society.*  
18 *Series A (General)* 1977;140(1):48.  
19  
20 440 37 Stenberg K, Lauer JA, Gkountouras G, et al. Econometric estimation of WHO-CHOICE  
21 country-specific costs for inpatient and outpatient health service delivery. *Cost Eff*  
22 *Resour Alloc* 2018;16:11.  
23  
24 38 Ludwig K, Graf von der Schulenburg J-M, Greiner W. German Value Set for the EQ-  
25 5D-5L. *Pharmacoeconomics* 2018;36(6):663–74.  
26  
27  
28  
29  
30  
31  
32  
33  
34  
35  
36  
37  
38  
39  
40  
41  
42  
43  
44  
45  
46  
47  
48  
49  
50  
51  
52  
53  
54  
55  
56  
57  
58  
59  
60

1  
2  
3 445 **Authors' contributions**  
4

5 DP: study conception and design, statistical methods and sample size calculations, writing and  
6 reviewing of the manuscript. MC, TK, GM, KvA, JH: study design with particular focus on  
7 cardiovascular endpoints, reviewing of the manuscript. LL: study design with particular focus  
8 on radiological methods, reviewing of the manuscript. PN, KP: study design, ethics, data  
9 management, writing and reviewing of the manuscript. JP: study design with particular focus  
10 on neurological methods and endpoints, reviewing of the manuscript. DE: study design with  
11 450 particular focus on health economics and patient satisfaction, reviewing of the manuscript.  
12 CDE: research that lay foundation for trial, initial study conception, study design, writing and  
13 reviewing of the manuscript. All authors have read and approved the final manuscript.  
14  
15  
16  
17  
18  
19

20 455 **Funding statement**  
21

22 This project has received funding from the European Union's Horizon 2020 research and  
23 innovation programme under grant agreement 733203 and from the German Research  
24 Foundation under grant number ET 127/2-1.  
25  
26

27  
28 **Competing interests statement**  
29

30 460 The authors have no competing interests related to this trial.  
31  
32  
33  
34  
35  
36

37 **Figure Legends**  
38

39 **Figure 1:** Schematic portrayal of the participant timeline and visit schedule for the PAPAartis  
40 465 trial.  
41  
42  
43  
44  
45  
46  
47  
48  
49  
50  
51  
52  
53  
54  
55  
56  
57  
58  
59  
60

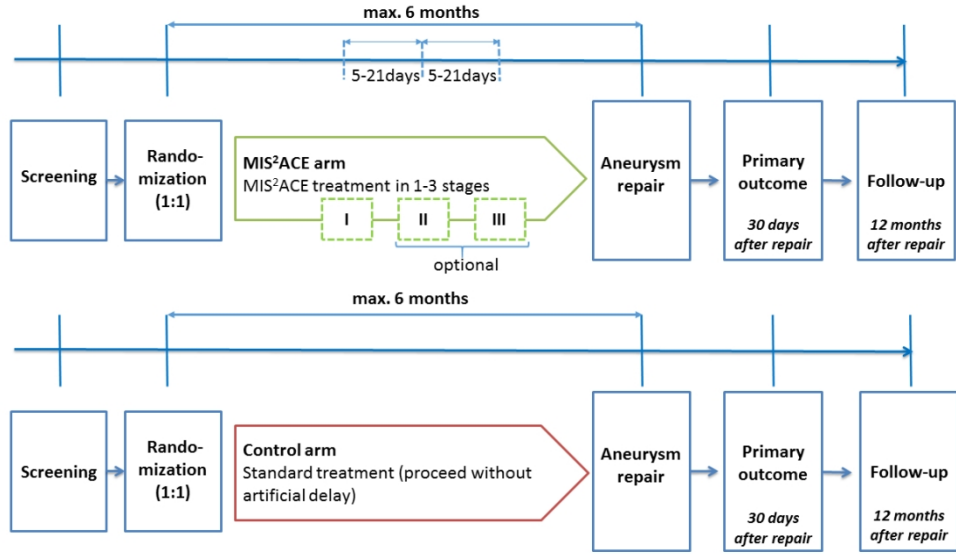

Figure 1: Schematic portrayal of the participant timeline and visit schedule for the PAPAartis trial.

338x190mm (96 x 96 DPI)

# BMJ Open

## Paraplegia Prevention in Aortic Aneurysm Repair by Thoracoabdominal Staging with 'Minimally-Invasive Staged Segmental Artery Coil-Embolization' (MIS<sup>2</sup>ACE): Trial protocol for a Randomized Controlled Multicentre Trial

|                                 |                                                                                                                                                                                                                                                                                                                                                                                                                                                                                                                                                                                                                                                                                                                                                                                                                                                                                                                                                                                                                                         |
|---------------------------------|-----------------------------------------------------------------------------------------------------------------------------------------------------------------------------------------------------------------------------------------------------------------------------------------------------------------------------------------------------------------------------------------------------------------------------------------------------------------------------------------------------------------------------------------------------------------------------------------------------------------------------------------------------------------------------------------------------------------------------------------------------------------------------------------------------------------------------------------------------------------------------------------------------------------------------------------------------------------------------------------------------------------------------------------|
| Journal:                        | <i>BMJ Open</i>                                                                                                                                                                                                                                                                                                                                                                                                                                                                                                                                                                                                                                                                                                                                                                                                                                                                                                                                                                                                                         |
| Manuscript ID                   | bmjopen-2018-025488.R1                                                                                                                                                                                                                                                                                                                                                                                                                                                                                                                                                                                                                                                                                                                                                                                                                                                                                                                                                                                                                  |
| Article Type:                   | Protocol                                                                                                                                                                                                                                                                                                                                                                                                                                                                                                                                                                                                                                                                                                                                                                                                                                                                                                                                                                                                                                |
| Date Submitted by the Author:   | 05-Dec-2018                                                                                                                                                                                                                                                                                                                                                                                                                                                                                                                                                                                                                                                                                                                                                                                                                                                                                                                                                                                                                             |
| Complete List of Authors:       | Petroff, David; University of Leipzig, Clinical Trial Centre<br>Czerny, Martin; Universitäts-Herzzentrum Freiburg Bad Krozingen GmbH; Albert-Ludwigs-Universität Freiburg Medizinische Fakultät<br>Kölbl, Tilo; University heart center hamburg, Department of Vascular Medicine<br>Melissano, Germano; Università Vita Salute San Raffaele, Division of Vascular Surgery<br>Lonn, Lars; Rigshospitalet, Department of (Interventional) Radiology<br>Haunschild, Josephina; University Heart Center Leipzig, Department of Cardiac Surgery<br>von Aspern, Konstantin; University Heart Center Leipzig, Department of Cardiac Surgery<br>Neuhaus, Petra; University of Leipzig, Clinical Trial Centre<br>Pelz, Johann; Universitätsklinikum Leipzig, Department of Neurology<br>EPSTEIN, DAVID; Universidad de Granada - Campus de Cartuja, Economía Aplicada<br>Romo-Avilés, Nuria<br>Piotrowski, Katja; University of Leipzig, Clinical Trial Centre<br>Etz, Christian; University Heart Center Leipzig, Department of Cardiac Surgery |
| <b>Primary Subject Heading</b>: | Cardiovascular medicine                                                                                                                                                                                                                                                                                                                                                                                                                                                                                                                                                                                                                                                                                                                                                                                                                                                                                                                                                                                                                 |
| Secondary Subject Heading:      | Neurology                                                                                                                                                                                                                                                                                                                                                                                                                                                                                                                                                                                                                                                                                                                                                                                                                                                                                                                                                                                                                               |
| Keywords:                       | Thoracoabdominal aortic aneurysms, TAAA, spinal cord injury, SCI, segmental artery coil embolization, MISACE                                                                                                                                                                                                                                                                                                                                                                                                                                                                                                                                                                                                                                                                                                                                                                                                                                                                                                                            |
|                                 |                                                                                                                                                                                                                                                                                                                                                                                                                                                                                                                                                                                                                                                                                                                                                                                                                                                                                                                                                                                                                                         |

SCHOLARONE™  
Manuscripts

1  
2  
3 **Paraplegia Prevention in Aortic Aneurysm Repair by Thoracoabdominal**  
4 **Staging with ‘Minimally-Invasive Staged Segmental Artery Coil-**  
5 **Embolization’ (MIS<sup>2</sup>ACE): Trial protocol for a Randomized Controlled**  
6 **Multicentre Trial**  
7  
8  
9  
10

11 David Petroff,<sup>1</sup> Martin Czerny,<sup>2,3</sup> Tilo Kölbel,<sup>4</sup> Germano Melissano,<sup>5</sup> Lars Lonn,<sup>6</sup> Josephina  
12 Haunschild,<sup>7</sup> Konstantin von Aspern,<sup>7</sup> Petra Neuhaus,<sup>1</sup> Johann Pelz,<sup>8</sup> David Epstein,<sup>9</sup> Nuria  
13 Romo-Avilés,<sup>10</sup> Katja Piotrowski,<sup>1</sup> Christian D Etz<sup>7</sup>  
14  
15  
16

17 <sup>1</sup> Clinical Trial Centre, University of Leipzig, Germany

18 <sup>2</sup> University Heart Center Freiburg-Bad Krozingen, Germany

19 <sup>3</sup> Faculty of Medicine, Albert Ludwigs University Freiburg, Germany

20 <sup>4</sup> German Aortic Center Hamburg, Department of Vascular Medicine, University Heart  
21 Center, Hamburg, Germany

22 <sup>5</sup> Division of Vascular Surgery, "Vita-Salute" University, IRCCS San Raffaele Scientific  
23 Institute, Milan, Italy

24 <sup>6</sup> Department of (Interventional) Radiology, Rigshospitalet, National Hospital and University  
25 of Copenhagen, Denmark

26 <sup>7</sup> University Department for Cardiac Surgery, Leipzig Heart Center, Germany

27 <sup>8</sup> Department of Neurology, Leipzig University Hospital, Germany

28 <sup>9</sup> Department of Applied Economics, University of Granada, Spain.

29 <sup>10</sup> Department of Social Anthropology, University of Granada, Spain.  
30  
31  
32  
33  
34  
35  
36  
37  
38  
39  
40  
41  
42  
43

44 **Corresponding author:**

45 David Petroff (for the journal and questions regarding trial design)

46 Clinical Trial Centre, University of Leipzig

47 Haertelstr. 16-18, 04107 Leipzig, Germany

48 +49 341 9716354

49 [David.Petroff@zks.uni-leipzig.de](mailto:David.Petroff@zks.uni-leipzig.de)

50  
51 Christian Etz (for medical questions)

52 [Chrstitian.Etz@medizin.uni-leipzig.de](mailto:Chrstitian.Etz@medizin.uni-leipzig.de)  
53  
54  
55

56 **Word count:** 3956

57  
58 **Keywords:** Thoracoabdominal aortic aneurysms, TAAA, spinal cord injury, SCI, segmental  
59 artery coil embolization, MIS<sup>2</sup>ACE  
60

## ABSTRACT

**Introduction** Spinal cord injury (SCI) including permanent paraplegia constitutes a common complication after repair of thoracoabdominal aortic aneurysms. The staged-repair concept promises to provide protection by inducing arteriogenesis so that the collateral network can provide a robust blood supply to the spinal cord after intervention. Minimally invasive staged segmental artery coil embolization (MIS<sup>2</sup>ACE) has been proved recently to be a feasible enhanced approach to staged repair.

**Methods and analysis** This randomized controlled trial (RCT) uses a multi-centre, multinational, parallel group design, where 500 patients will be randomized in a 1:1 ratio to standard aneurysm repair or to MIS<sup>2</sup>ACE in 1-3 sessions followed by repair. Before randomization, physicians document whether open or endovascular repair is planned. The primary endpoint is successful aneurysm repair without substantial SCI 30 days after aneurysm repair. Secondary endpoints include any form of SCI, mortality (up to one year), length of stay in the intensive care unit (ICU), costs and quality of life adjusted years (QALYs). A generalized linear mixed model will be used with the logit link function and randomization arm, mode of repair (open or endovascular repair), the Crawford type and the euroSCORE II as fixed effects and the centre as a random effect. Safety endpoints include kidney failure, respiratory failure and embolic events (also from debris). A qualitative study will explore patient perceptions.

**Ethics and dissemination** This trial has been approved by the lead Ethics Committee from the University of Leipzig (435/17-ek) and will be reviewed by each of the Ethics Committees at the trial sites. A dedicated project is coordinating communication and dissemination of the trial.

**Trial registration number** NCT03434314

### Strengths and limitations of this study

- Large multicentre randomized controlled trial RCT in aortic surgery addressing a fundamental issue in thoracoabdominal aortic aneurysm TAAA repair
- Includes open and endovascular repair
- Provides 1-year data on SCI and mortality
- Looks at potential reductions in bleeding complications and endoleaks



- Cannot be blinded

## INTRODUCTION

This publication describes the study design and protocol of a clinical trial on Paraplegia Prevention in Aortic Aneurysm Repair by Thoracoabdominal Staging (“PAPAartis”) and follows the SPIRIT recommendations very closely (“Standard Protocol Items: Recommendations for Interventional Trials”).[1, 2]

### Background

Aortic aneurysms are permanent and localized dilations of particular portions of the aorta that grow unpredictably, but with a mean estimated rate of about two millimetres per year[3] and remain asymptomatic for long periods of time. Based on the aneurysm localization, one can distinguish between thoracic, abdominal and thoracoabdominal aortic aneurysms (TAAA). The latter are complex and generally categorized according to the Crawford classification (type I-IV), based on the anatomic extent of the aneurysm.[4–6]

A study comparing a historic cohort to a matched treated population showed that the dismal five-year survival rate of 13% given the natural course of the disease could be increased to 61% with open surgical repair.[7] Although successful aortic repair cures the disease, both open and endovascular modalities can result in paraplegia from spinal cord ischaemia and mortality is high. This particularly affects patients with aneurysms extending from the thoracic to the abdominal aorta and thus involving many segmental arteries (SAs) supplying the spinal cord. It has been assumed that paraplegia in open repair arises primarily due to temporary interruption of spinal cord blood supply during the operative procedure with a duration sufficient to damage cell bodies and nerve tracts in the spinal cord irreversibly. In endovascular repair, the chronic occlusion of several segmental arteries (as well as the temporary compromising of internal iliac blood supply during the procedure) induces paraplegia with a comparable incidence.[8] Various adjunctive perioperative neuroprotective strategies, such as motor/somatosensory evoked potential monitoring, meticulous perioperative blood pressure management, cerebrospinal fluid (CSF) drainage and even local spinal cord cooling, have been introduced to minimize ischaemic spinal cord injury (SCI).[9] These methods have achieved a notable decrease in the incidence of paraplegia and paraparesis, but it remains high with an incidence of up to 20% for Crawford type II aneurysms.[10]

## Rationale

Members of the study team have found that the deliberate staged occlusion of segmental arteries leading to the paraspinous collateral network and finally supplying the spinal cord can trigger arterial collateralization, thus stabilizing blood supply to the spinal cord from alternate inflow sources and potentially preventing ischaemia.[11–16] This approach was devised after years of research that included recognition of the body’s ability to tolerate segmental artery sacrifice[17] given haemodynamic stability[18, 19] along with the identification of the paraspinous arterial collateral network itself.[12, 16] One means of occluding arteries in the clinical setting has been termed ‘minimally invasive staged segmental artery coil embolization’ (MIS<sup>2</sup>ACE), which was proved feasible in 2015.[20] A consecutive case series of over 50 patients lends credence to its safety.[21] This is thus the ideal time to carry out such a trial – where the need to test efficacy, effectiveness and safety are paramount, but before it has gained acceptance despite lack of evidence.

## Objectives

The primary objective of the PAPAartis trial is to test the hypothesis that MIS<sup>2</sup>ACE can greatly reduce the incidence of ischaemic SCI and mortality compared to standard open surgical or endovascular thoracoabdominal aneurysm repair alone.

## Trial Design

PAPAartis is a multi-national, open label, randomized controlled trial. It has two parallel groups with equal allocation and the primary endpoint is to be tested in a superiority framework.

## METHODS AND ANALYSIS

### Study setting

To demonstrate the efficacy of MIS<sup>2</sup>ACE while minimizing risks, we chose participating sites with great expertise in the treatment of TAAA and tried to create a balance between those specializing in open and those in endovascular repair. The trial is jointly funded by the European Union as part of the Horizon 2020 programme and by the German Research Foundation, resulting in sites exclusively in Europe and with a strong emphasis on Germany. The recruiting sites (n=29) at commencement of the trial come from Austria (n=2), France (n=2), Germany (n=16), Italy (n=2), the Netherlands (n=1), Poland (n=2), Sweden (n=2), Switzerland (n=1) and the United Kingdom (n=1). In addition, Denmark provides an independent radiological core unit, Spain heads projects on health economics and patient satisfaction, the USA provide expert advice and Scotland heads a project on communication and dissemination. Patient recruitment will begin imminently and is planned to last two years.

### Eligibility criteria

#### *Inclusion criteria*

1. TAAA, Crawford type II or III (verified by radiological core unit)
2. planned open or endovascular repair of aneurysm within four months
3.  $\geq 18$  years old

The inclusion criteria are chosen to select a high risk (Crawford type II and III) population amenable to MIS<sup>2</sup>ACE therapy.

#### *Key exclusion criteria*

1. complicated (sub-) acute type B aortic dissection (but all chronic type B dissections will be included)
2. ruptured and urgent aneurysm (emergencies)
3. untreated aortic arch aneurysm (patients with a previous successful aortic arch aneurysm repair may be included independent of technique used)
4. bilaterally occluded iliac arteries or chronic total occlusion of left subclavian artery
5. pre-operative neurological deficits or spinal cord dysfunction
6. major untreated cardio-pulmonary disease
7. life-expectancy of less than one year
8. high risk for segmental artery embolism ('shaggy' aorta)

1  
2  
3 9. severe contrast agent allergy, severe reduction in glomerular filtration rate  
4  
5

6 The first two exclusion criteria were chosen since patients should not be subjected to  
7  
8 85 additional risk as a result of the waiting time in the MIS<sup>2</sup>ACE arm before TAAA repair can be  
9 performed. The third exclusion criterion was chosen since these patients have considerable  
10 risk unrelated to the focus of the trial. Exclusion criterion 4 was chosen, since sufficient blood  
11 supply after MIS<sup>2</sup>ACE cannot be guaranteed on the one hand, and the prior occlusion implies  
12 that no additional treatment options are available in this anatomic region.  
13  
14  
15

16  
17 90 **Intervention**

18  
19 An overview of the trial is provided in Fig. 1. The treating physicians choose the mode of  
20 repair, after which the patient is randomized to the interventional or the control arm.  
21  
22

23 In the interventional arm (MIS<sup>2</sup>ACE), segmental arteries (SAs) will be occluded in one to  
24 three sessions some weeks before the aneurysm repair. Target SAs for coil/plug deployment  
25 will be identified considering the extent of the planned repair and individual SA anatomy. The  
26 95 occlusion of up to 7 SAs will be performed in a single session and conducted through a  
27 peripheral artery access (e.g. the common femoral artery) in local anaesthesia. Local  
28 anaesthesia is important so that patients can provide immediate feedback regarding potential  
29 neurological symptoms. Selected SAs will be catheterized (e.g. with a 5F catheter or 2.7F  
30 microcatheter). Microcoils or vascular plugs will be used for the occlusion itself, not however  
31 particles, which could cause unwanted microembolisms to the spinal cord directly. This will  
32 be performed in the proximal SA to ensure that the collateral network itself is not affected.  
33 The procedure may be done without spinal fluid drainage but this is left at the discretion of  
34 the centre. The length of the procedure, the amount of contrast dye and the dose of radiation  
35 100 will be documented exactly. The recommended interval between sessions is 21 days, with a  
36 strict safety minimum of 5 days.[11] Experts in endovascular catheterization in small vessels  
37 (e.g. cardiovascular surgeons, interventionalists, endovascular surgeons, interventional  
38 radiologists, paediatric cardiologists) will perform MIS<sup>2</sup>ACE. It is essential to maintain blood  
39 pressure above 140 mmHg, but for hypertensive patients, it is imperative that the post-  
40 operative pressure should not fall below their individual pre-operative systolic blood pressure  
41 during and after the procedure (invasive monitoring), ideally for at least 2 days. Anti-  
42 hypertensive drugs have to be adjusted accordingly. Therefore, the patient should stay in the  
43 IMCU for at least 48 hours, preferably longer. Reduction or even interruption of oral anti-  
44 105 hypertensive medication and use of low-dose vasopressors may be utilized and are preferable  
45 to volume therapy, which increases central venous pressure and thereby also CSF pressure.  
46  
47  
48  
49  
50  
51  
52  
53 110  
54  
55  
56  
57  
58  
59  
60

1  
2  
3 In the control arm, treatment will be according to the optimal state-of-the art procedures at the  
4 local site. This ensures a real-world comparison in which the control arm is as strong as  
5 possible.  
6  
7

8  
9 As the trial proceeds, statistical monitoring and concomitant projects may identify need for  
10 revisions to the intervention. These alterations will then be adopted with protocol  
11 120 amendments to optimize patient safety.  
12  
13

## 14 **Endpoints**

### 15 *Primary endpoint*

16  
17 The primary endpoint is successful treatment of the aneurysm. We define “success” as (a) the  
18 patient is alive and without substantial SCI 30 days after treatment, and (b) the aneurysm did  
19 not rupture and was excluded within six months of randomization.  
20 125  
21  
22

23  
24 Patients, who have not been treated within six months of randomization will be treated as  
25 failures to ensure that success/failure is defined for all randomized patients. This facilitates  
26 the intention to treat analysis (see below) and reduces the amount of missing data. During  
27 recruitment, the Trial Steering Committee will ensure that time lapse alone leads only very  
28 rarely to failure, otherwise this criterion will be reworked. The definition of success  
29 pertaining to mortality and SCI will be assessed 30 days after TAAA repair and “substantial  
30 130 SCI” means that the patient is unable to stand without assistance and is defined using the  
31 modified Tarlov scale[22] (see below) and assessed by a board certified neurologist whenever  
32 possible:  
33  
34  
35  
36  
37  
38  
39  
40

41 0 – No lower extremity movement

42  
43 1 – Lower extremity motion without gravity

44  
45 2 – Lower extremity motion against gravity

46  
47 3 – Able to stand with assistance

48  
49 4 – Able to walk with assistance  
50 140

51  
52 5 – Normal  
53

54  
55 A training video describing this scale is provided for study personnel.  
56

57  
58 Treatment success for open repair is defined by complete resection and graft replacement in  
59 the absence of major related complications.  
60

1  
2  
3 145 *Secondary endpoints*  
4

5 For secondary endpoints, treatment success will be assessed and based on follow-up CT/MR  
6 images. Treatment success for endovascular repair is defined based on the position paper of  
7 the European Association for Cardio-Thoracic Surgery (EACTS) and the European Society of  
8 Cardiology (ESC), in collaboration with the European Association of Percutaneous  
9 Cardiovascular Interventions (EAPCI)[23] and takes into account upcoming guideline papers.  
10 Failure is defined as substantial progression of the aneurysm sac (> 3 mm) or the presence of  
11 major related complications (e.g. type I/III endoleaks). Completion angiography and/or  
12 follow-up MRI/CT from patients with endovascular repair will be conducted as part of  
13 clinical routine and will be sent to Copenhagen for assessment.  
14  
15  
16  
17  
18  
19  
20

21  
22 155 Note: The point in time “one year” refers to one year after TAAA repair. If patients retained  
23 in the full analysis set have not had a repair, then “30 days after TAAA repair” and “at one  
24 year” will be treated as 30 days and one year after randomization.  
25  
26

- 27 1. Substantial SCI at 30 days after TAAA repair and at one year
- 28 2. SCI according to the modified Tarlov scale from TAAA repair treatment to one year
- 29 30 3. All-cause mortality at 30 days and one year after TAAA repair
- 31 32 4. Length of stay in intensive care unit and intermediate care unit after TAAA repair
- 33 34 5. Sub-group analyses for open repair and endovascular repair separately
- 35 36 6. Re-operation for bleeding and drainage volumes in the first 24 h and use of blood  
37 products (only for open repair)
- 38 39 7. Cross-clamping times during open surgery
- 40 41 8. Residual aneurysm sac perfusion, i.e. type II endoleaks (only for endovascular repair)
- 42 43 9. Health-related quality of life will be collected using the WHOQOL-BREF[24] and the  
44 EuroQoL EQ-5D-5L instruments.[25] Hospital and other healthcare resource use will  
45 be collected. Healthcare costs, quality-adjusted life years (QALYs) and the  
46 incremental cost-effectiveness ratio (ICER) over one year will be calculated.[26]  
47  
48 170

49  
50 *Safety endpoints*  
51

52 Beyond AE/SAE reporting and descriptive statistics on radiation exposure, the following  
53 issues will receive special attention: kidney failure, respiratory failure and embolic events  
54 (also from debris). Kidney failure is defined as requiring dialysis and or deterioration in  
55 chronic kidney disease (CKD) stage by at least two stages. Acute and chronic kidney disease  
56 175 will be distinguished. Having identified particular safety risks in the trial aids us in collecting  
57 appropriate data, assessing and reporting these harms, as recommended by SPIRIT. [1, 2] We  
58  
59  
60

1  
2  
3 do not use these to define stopping criteria however, which is left at the discretion of the Data  
4 Monitoring Committee.

### 6 180 **Participant timeline**

8  
9 Please refer to Fig. 1 for details of the visit schedule and participant timeline.

### 11 **Sample size and recruitment**

13  
14 Estimates of effect size are difficult for several reasons. Foremost, there are large  
15 discrepancies between outcome rates quoted in the literature. Moreover, the impact of recent  
16 improvements in techniques on outcomes cannot yet be quantified accurately and, finally the  
17 185 effect size depends on the improvement due to the trial intervention, which, in turn, depends  
18 on anatomy, post-repair management and other complex factors. Taking a random effects  
19 model of the data from large recent publications for open [10, 27–29] and endovascular repair  
20 [30–32] one finds an estimated incidence of 18% (95% prediction interval 15% to 23%) for  
21 open repair and a very uncertain 24% (2 to 79)% for endovascular repair. The prediction  
22 interval as opposed to the confidence interval provides the correct bounds for what can be  
23 expected in the trial.[33] The resources and time available to the study allow for the  
24 recruitment of 500 patients. Assuming success rates of 80% in the control arm and 90% in the  
25 190 intervention arm and using a group-sequential design [34] with two interim analyses, this then  
26 implies a power of just over 87%.[35] The definitions of the primary endpoint and the full  
27 analysis set imply that only very few dropouts are to be expected for this analysis and that  
28 compliance will not be a problem. The severity of the therapy and recovery times mean that  
29 loss to follow-up is not expected to be a major factor.

31  
32 The planned recruitment is between 8 and 9 patients per site per year. This is roughly half the  
33 number of patients that meet the inclusion criteria. However, slow recruitment plagues many  
34 200 trials and mitigation strategies have already been developed. A list of interested recruitment  
35 sites ( $n > 10$ ) is being collected to expand the consortium. Statistical monitoring will be used  
36 to identify reasons for screened patients not being included in the trial so that minor and  
37 clinically justified amendments to the trial protocol can address these issues, e.g. through  
38 adjustments to the inclusion and exclusion criteria. Finally, a newsletter including recruitment  
39 205 by site will be distributed at regular intervals to spawn healthy competition among the team  
40 members.

### 58 **Randomization**



1  
2  
3 Patients will be randomized in a 1:1 ratio to the intervention and control arms with a random  
4  
5 210 number generator. Randomization will be performed online at the recruitment centres with a  
6  
7 tool prepared and hosted by the Clinical Trial Centre Leipzig

8  
9 Some of the centres are expected to recruit a very small number of patients, meaning that  
10  
11 block randomization stratified by centre is unfeasible. Although minimization schemes could  
12  
13 be used to attain roughly balanced allocation of patients, even at the centre level, there is  
14 215 controversy about the methods needed to analyse such trials. To avoid potential complexities  
15  
16 in analysis, we have thus opted for a very simple randomization scheme, knowing that small  
17  
18 imbalances in the number of patients per arm are to be expected.

### 20 **Selected data collection methods**

21  
22 Neurological examinations will be performed by board certified neurologists whenever  
23  
24 220 possible. If such an examination is made upon discharge and no signs of impairment are  
25  
26 found, then verification that this holds at 30 days is only required by telephone. Any signs of  
27  
28 impairment necessitate a full examination at 30 days however.

29  
30 If the assessment of Crawford classification or successful treatment carried out by the  
31  
32 radiological unit in Copenhagen should disagree with the treating physician's opinion, the  
33 225 blinded independent Endpoint Committee will make the final decision. The definition of  
34  
35 success does not necessarily require that the MRI/CT be made within six months of  
36  
37 randomization. Later verification of success is acceptable.

### 38 **Data management**

39  
40 The EDC tool SecuTrial®, developed and distributed by interActive Systems GmbH, is used  
41  
42 230 for creation of the study database. Data entry uses eCRF data entry masks and data changes  
43  
44 are tracked automatically including date, time and person who entered/changed information  
45  
46 (audit trail). Major corrections or major missing data have to be explained.

47  
48 The information entered into the eCRF by the investigator or an authorised member of the  
49  
50 study team is systematically checked for completeness, consistency and plausibility by  
51  
52 235 routines implemented in the database, such that discrepancies can be dealt with at data entry.  
53  
54 Errors and warnings are listed in a validation report and can be resolved at any time during  
55  
56 the data entry process. On completion of data entry, the site staff flags the eCRF-pages as  
57  
58 'data entry completed'.  
59  
60



1  
2  
3 Throughout the study, a backup of all data is made daily. Unauthorised access to patient data  
4  
5 240 is prevented by the access concept of the study database, which is based on strict file system  
6 permission.  
7

8  
9 At the end of the study, once the database is complete and accurate, the database will be  
10 locked. Subsequent changes to the database are possible only by joint written agreement  
11 between co-ordinating investigator, trial statistician and data manager.  
12  
13

## 14 15 245 **Statistical methods**

### 16 17 *Analysis Sets*

18  
19 If patients retract informed consent before any procedure is performed (repair or SA  
20 occlusion), they will be excluded from the primary analysis, since we expect some control  
21 arm patients to be dissatisfied with their assigned treatment, retract consent, and seek  
22 MIS<sup>2</sup>ACE outside of the trial. Including them would be anti-conservative. The full analysis  
23 set (FAS) includes all randomized patients that have had a session for occluding segmental  
24 250 arteries (intervention arm) or have had a repair procedure (conventional arm). Randomized  
25 patients whose aneurysm ruptures or who die from any cause will be included in the FAS,  
26 irrespective of the above stipulations.  
27  
28

29  
30 If a sufficiently large number of patients violate the trial protocol, particularly regarding the  
31 trial intervention, then a per protocol analysis will be performed using the set of patients that  
32 conformed to the major terms in the protocol. A precise definition of the per protocol set will  
33 be provided in the statistical analysis plan.  
34 255

35  
36 Patients are generally analysed regarding safety according to treatment received. In our case,  
37 an undue delay between randomization and treatment is a risk factor, meaning that such  
38 260 patients will be included in the safety analyses even if they have not yet received treatment.  
39

### 40 41 *Statistical Analysis*

42  
43 The primary analysis is an intention to treat (ITT) analysis based on the FAS and makes use  
44 of a generalized linear mixed model with the logit link function. The success/failure of  
45 265 treatment will be the dependent variable. The assigned randomization arm, mode of repair  
46 (open or endovascular repair), the Crawford type and the euroSCORE II are fixed effects and  
47 the centre will be treated as a random effect. The euroSCORE II already takes age, sex and  
48 other relevant factors into account. The interaction term between the randomization arm and  
49 the other fixed effects will only be included if evidence for a strong interaction effect are seen,  
50  
51  
52  
53  
54  
55  
56  
57  
58  
59  
60

1  
2  
3 270 since this would otherwise lead to a substantial loss of power.[36, 37] As a supplementary  
4 analysis, an analogous mixed model will be performed with a unity link function to provide  
5 estimates and confidence intervals for absolute risk differences.  
6  
7

8  
9 The definitions of the full analysis set and the primary endpoint are chosen so that almost no  
10 missing data are expected. If success cannot be ascertained with certainty, the patient will be  
11  
12 275 treated as a failure. Sensitivity analyses will be used to gauge the effect of missing data on the  
13 estimates and conclusions drawn.  
14  
15

16 Interim analyses are planned 30 days after 50% of patients (n=250) and 75% (n=375) have  
17 been treated for the aneurysm. The primary endpoint will be analysed and randomization can  
18 be terminated for efficacy if a p-value of 0.0030 (first interim analysis) or 0.018 (second  
19  
20 280 interim analysis) is reached. The p-value for demonstrating efficacy in the final analysis is  
21 0.044.  
22  
23  
24  
25

26 Analysis of binary secondary outcomes will be treated on the same footing as the primary  
27 analysis. Mortality at 30 days will be treated as binary as opposed to time-to-event, since  
28 prolonging life in the post-operative phase for a matter of days is not considered clinically  
29 relevant. Subgroup analyses of the two Crawford types and of the two modes of repair will be  
30  
31 285 presented in the form of contingency tables. Mixed model Cox regression with covariates  
32 euroSCOREII, Crawford type and mode of repair will be used for one-year mortality with  
33 randomization arm as the independent variable of interest and centre as a random effect. If the  
34 assumption of proportional hazards is violated substantially, a logistic regression will be used.  
35  
36  
37  
38  
39 290 Kaplan-Meier curves will be used to represent the data.  
40  
41

42 In explorative analyses, the number of patent segmental arteries and the number occluded will  
43 be taken into account with respect to SCI and mortality. The anatomical position of the  
44 segmental arteries may also be used.  
45  
46  
47

48 ICU-time and ICMU-time will be analysed with a linear mixed effects model with the same  
49  
50 295 fixed and random effects as in the primary analysis and may be log transformed if warranted.  
51 Re-operation for bleeding and type II endoleaks will be presented for the subgroups of  
52 patients treated with open or endovascular repair, respectively.  
53  
54

55 Descriptive statistics will be used for further safety outcomes along with odds ratios  
56 according to treatment received, as appropriate.  
57  
58

59 300 Total mean cost per patient over one year will be estimated by multiplying healthcare  
60 resource use collected in the trial by unit costs from the country health system.[38] QALYs

1  
2  
3 will be calculated in each treatment group using the EQ-5D-5L value set.[39] The ICER will  
4 be calculated, and will inform whether MIS<sup>2</sup>ACE is cost-effective on average for patients with  
5 TAAA Crawford type II or III. Bootstrap methods will be used to characterize  
6  
7  
8 305 uncertainty.[26]

9  
10 Further details will be provided in a statistical analysis plan.

### 11 12 13 **Statistical monitoring**

14  
15 The trial conduct will be closely supervised by means of central and statistical monitoring.

16  
17 The objectives are a) to detect safety relevant signals as soon as possible, b) to detect non-  
18  
19 310 compliance and relevant protocol violations and to prevent their future occurrence by prompt  
20 reaction, c) to prevent missing visits or measurements by prompt reminders and d) to explore  
21 means of improving on the MIS<sup>2</sup>ACE procedure.

22  
23  
24  
25 Statistical and central monitoring will start immediately after inclusion of the first patient. The  
26 relevant reports and descriptive statistics will be updated and discussed at the regular  
27  
28 315 meetings of the Leipzig study team. Problems and abnormalities will be presented at regular  
29 intervals to the co-ordinating investigator.

### 30 31 32 **On-site monitoring**

33  
34 A risk-based monitoring strategy will be implemented as required by ICH E6 (Chapter 5.0)  
35 According to the risk analysis, treatment delivery parameters, adverse events, follow-up  
36  
37 320 information, data transmission and protection and informed consent documents comprise risk-  
38 bearing trial aspects and will be monitored.

39  
40  
41  
42 Prior to recruitment, each participating centre will receive a site initiation visit, during which  
43 the trial protocol (if necessary) and the eCRFs will be reviewed with centre staff and any  
44 necessary training will be provided. During the study, trial monitors will maintain regular  
45  
46 325 contact with trial centre staff (by telephone/fax/email/post) to track the progress of the trial,  
47 respond to any problems, and provide general assistance and support.

48  
49  
50  
51 The first regular monitoring visit at a site will take place after the randomization of the site's  
52 first patient to check protocol compliance and to prevent further systematic errors due to  
53 misunderstandings. Trial site visits will take place on a regular basis. The frequency of  
54  
55 330 monitoring visits will depend on the trial site's recruitment rate as well as on potential  
56 problems detected during previous on-site visits or by central monitoring.

1  
2  
3 Prior to every scheduled on-site visit, the monitor will receive summaries of the site's patient  
4 data already documented in the database, and if applicable with data indicating possible  
5 protocol deviations or inconsistencies. During the visits, the monitor will a) check informed  
6  
7  
8 335 consent forms of all patients enrolled, b) perform source data verification of key data in a  
9 random sample of at least 20% of the site's patients, c) perform targeted source data  
10 verification for patients with possible deviations, d) discuss open queries raised by data  
11 management or drug safety personnel, e) check essential parts of the investigator site file, f)  
12 check source data for AEs or SAEs, which have not been properly reported in the CRF/eCRF  
13 and g) check for major GCP-breaches and/or protocol violations.  
14  
15  
16  
17 340

### 18 19 **Harms**

20  
21 Safety endpoints related directly to MIS<sup>2</sup>ACE include kidney failure, respiratory failure and  
22 embolic events (also from debris). These endpoints will be listed according to treatment  
23 received with a breakdown according to the number of MIS<sup>2</sup>ACE sessions. In addition, data  
24  
25  
26  
27 345 on radiation exposure will be collected and presented descriptively.  
28

### 29 **Patient and Public Involvement**

30  
31 The trial protocol was developed in part by physicians with years of experience in treating  
32 TAAA patients. Their experience indicated that paraplegia is the greatest concern that patients  
33 have when deliberating on whether or not to be treated, and was thus chosen along with  
34 mortality for the primary outcome. A qualitative study will recruit a small number of patients  
35  
36  
37 350 for one-on-one in-depth interviews in different sites of the trial. The goal is for the patient to  
38 express in his or her own words the impact on their life of diagnosis and treatment, and look at  
39 changes that occur in quality of life, family, work, lifestyle and social environment from an  
40 ethnographic standpoint. Patients and the public have not yet been involved directly in the trial.  
41  
42  
43  
44  
45  
46  
47  
48  
49  
50  
51  
52  
53  
54  
55  
56  
57  
58  
59  
60

## 355 **ETHICS AND DISSEMINATION**

### **Approval and registration**

8 The trial protocol and the informed consent form have been reviewed and approved by the  
9 lead Ethics Committee from the University of Leipzig (435/17-ek) and will be reviewed by  
10 each of the Ethics Committees at the trial sites. The Federal Office for Radiation Protection in  
11 Germany has also approved the additional radiation use in the intervention group (Z5-22462/2  
12 – 2017-073). The trial has been registered with clinicaltrials.gov (NCT03434314).  
13  
14 360

15 Amendments to the protocol will be reviewed by Ethics Committees. Informed consent will  
16 be obtained before collecting any patient data and patient information.  
17  
18  
19  
20

### **External boards**

21  
22  
23 365 A Data Monitoring Committee (DMC) has been established to oversee patient safety and data  
24 quality in the trial. It consists of three members with expertise in aortic surgery, neurology  
25 and medical statistics. The DMC charter states that its role is to “safeguard the interests of  
26 trial participants, assess the safety and efficacy of the interventions during the trial, and assist  
27 and advise the trial steering committee to protect the validity and credibility of the trial. In  
28 order to do this, the DMC evaluates the results of the regular reports and their influence on the  
29 risk assessment for the patients as well as for the integrity of the trial. The DMC gives its  
30 recommendations at regular intervals as to whether the continuation of the trial is justifiable.”  
31  
32 370 Only the trial statistician and the DMC members will have access to the interim analyses until  
33 the end of the trial. At the inaugural meeting the members of the DMC will be asked to  
34 discuss whether SAEs related to the MIS<sup>2</sup>ACE procedure should be sent to them without  
35 delay.  
36  
37  
38  
39  
40 375  
41  
42  
43  
44

45 An expert advisory board consisting of four international experts on TAAA repair provide the  
46 active trial members with independent advice regarding trial design and conduct. It meets  
47 with leading members of the consortium on an annual basis and is kept abreast of the trial’s  
48 progress.  
49  
50 380

### **Dissemination**

51  
52  
53  
54 One project partner (MODUS Research and Innovation, Edinburgh, Scotland) has a project  
55 dedicated to communication and dissemination. Key channels, tools and target audiences for  
56 dissemination and use of project results will be identified in a Communication and  
57  
58  
59 385  
60 Dissemination Plan. The dissemination activities will be two-fold: basic communication about

1  
2  
3 the project to the public and specific dissemination to four target communities. One objective  
4 of the dissemination plan will be to support the project partners with the clinical recruitment.  
5 The other objective will be to reach out to wide audiences outside the project consortium at  
6 national, European and international levels (medical and health professionals, academics,  
7  
8  
9  
10 390 medical and biomedical industries, policy makers, EU regulators (e.g. the European  
11 Medicines Agency), patients groups, health NGOs, civil societies, scientific and lay media.  
12 The dissemination vehicles will be seminars, medical conferences and publications, project  
13 partners' individual communication streams. Dissemination material may include a project  
14 leaflet, newsletter, press releases and a trial website.  
15  
16  
17  
18  
19  
20  
21  
22  
23  
24  
25  
26  
27  
28  
29  
30  
31  
32  
33  
34  
35  
36  
37  
38  
39  
40  
41  
42  
43  
44  
45  
46  
47  
48  
49  
50  
51  
52  
53  
54  
55  
56  
57  
58  
59  
60

395 **REFERENCES**

- 1 Chan A-W, Tetzlaff JM, Altman DG, et al. SPIRIT 2013 statement: Defining standard protocol items for clinical trials. *Ann Intern Med* 2013;158(3):200–07.
- 2 Chan A-W, Tetzlaff JM, Gøtzsche PC, et al. SPIRIT 2013 explanation and elaboration: Guidance for protocols of clinical trials. *BMJ* 2013;346:e7586.
- 400 3 Elefteriades JA. Natural history of thoracic aortic aneurysms: Indications for surgery, and surgical versus nonsurgical risks. *Ann Thorac Surg* 2002;74(5):S1877-S1880.
- 4 Crawford ES, Crawford JL, Safi HJ, et al. Thoracoabdominal aortic aneurysms: preoperative and intraoperative factors determining immediate and long-term results of operations in 605 patients. *J Vasc Surg* 1986;3(3):389–404.
- 405 5 Elefteriades JA. Thoracic aortic aneurysm: reading the enemy's playbook. *Curr Probl Cardiol* 2008;33(5):203–77.
- 6 Frederick JR, Woo YJ. Thoracoabdominal aortic aneurysm. *Ann Cardiothorac Surg* 2012;1(3):277–85.
- 7 Miller C3, Porat EE, Estrera AL, et al. Number needed to treat: analyzing of the effectiveness of thoracoabdominal aortic repair. *Eur J Vasc Endovasc Surg* 2004;28(2):154–57.
- 410 8 Greenberg RK, Lu Q, Roselli EE, et al. Contemporary analysis of descending thoracic and thoracoabdominal aneurysm repair: a comparison of endovascular and open techniques. *Circulation* 2008;118(8):808–17.
- 9 Etz CD, Weigang E, Hartert M, et al. Contemporary spinal cord protection during thoracic and thoracoabdominal aortic surgery and endovascular aortic repair: a position paper of the vascular domain of the European Association for Cardio-Thoracic Surgery. *Eur J Cardiothorac Surg* 2015;47(6):943–57.
- 415 10 Conrad MF, Crawford RS, Davison JK, et al. Thoracoabdominal Aneurysm Repair: A 20-Year Perspective. *Ann Thorac Surg* 2007;83(2):S856-S861.
- 420 11 Etz CD, Luehr M, Kari FA, et al. Spinal cord perfusion after extensive segmental artery sacrifice: can paraplegia be prevented? *Eur J Cardiothorac Surg* 2007;31(4):643–48.
- 12 Etz CD, Kari FA, Mueller CS, et al. The collateral network concept: remodeling of the arterial collateral network after experimental segmental artery sacrifice. *J Thorac Cardiovasc Surg* 2011;141(4):1029–36.
- 425 13 Zoli S, Etz CD, Roder F, et al. Experimental two-stage simulated repair of extensive thoracoabdominal aneurysms reduces paraplegia risk. *Ann Thorac Surg* 2010;90(3):722–29.
- 14 Luehr M, Salameh A, Haunschild J, et al. Minimally invasive segmental artery coil embolization for preconditioning of the spinal cord collateral network before one-stage descending and thoracoabdominal aneurysm repair. *Innovations (Phila)* 2014;9(1):60–65.
- 430 15 Geisbusch S, Stefanovic A, Koruth JS, et al. Endovascular coil embolization of segmental arteries prevents paraplegia after subsequent thoracoabdominal aneurysm repair: an experimental model. *J Thorac Cardiovasc Surg* 2014;147(1):220–26.
- 16 Etz CD, Kari FA, Mueller CS, et al. The collateral network concept: A reassessment of the anatomy of spinal cord perfusion. *J Thorac Cardiovasc Surg* 2011;141(4):1020–28.
- 435 17 Etz CD, Halstead JC, Spielvogel D, et al. Thoracic and thoracoabdominal aneurysm repair: is reimplantation of spinal cord arteries a waste of time? *Ann Thorac Surg* 2006;82(5):1670–77.
- 18 Etz CD, Homann TM, Luehr M, et al. Spinal cord blood flow and ischemic injury after experimental sacrifice of thoracic and abdominal segmental arteries. *Eur J Cardiothorac Surg* 2008;33(6):1030–38.
- 440 19 Etz CD, Luehr M, Kari FA, et al. Paraplegia after extensive thoracic and thoracoabdominal aortic aneurysm repair: does critical spinal cord ischemia occur postoperatively? *J Thorac Cardiovasc Surg* 2008;135(2):324–30.
- 20 Etz CD, Debus ES, Mohr F-W, et al. First-in-man endovascular preconditioning of the paraspinal collateral network by segmental artery coil embolization to prevent ischemic spinal cord injury. *J Thorac Cardiovasc Surg* 2015;149(4):1074–79.
- 445



- 1  
2  
3 21 Branzan D, Etz CD, Moche M, et al. Ischaemic preconditioning of the spinal cord to prevent  
4 spinal cord ischaemia during endovascular repair of thoracoabdominal aortic aneurysm: First  
5 clinical experience. *EuroIntervention* 2018;14(7):828–35.
- 6  
7 22 Chiesa R, Melissano G, Marrocco-Trischitta MM, et al. Spinal cord ischemia after elective stent-  
8 450 graft repair of the thoracic aorta. *J Vasc Surg* 2005;42(1):11–17.
- 9 23 Grabenwöger M, Alfonso F, Bachet J, et al. Thoracic Endovascular Aortic Repair (TEVAR) for  
10 the treatment of aortic diseases: A position statement from the European Association for Cardio-  
11 Thoracic Surgery (EACTS) and the European Society of Cardiology (ESC), in collaboration  
12 with the European Association of Percutaneous Cardiovascular Interventions (EAPCI). *Eur J*  
13 455 *Cardiothorac Surg* 2012;42(1):17–24.
- 14 24 THE WHOQOL GROUP. Development of the World Health Organization WHOQOL-BREF  
15 Quality of Life Assessment. *Psychological Medicine* 1998;28(3):551–58.
- 16 25 Janssen MF, Pickard AS, Golicki D, et al. Measurement properties of the EQ-5D-5L compared  
17 to the EQ-5D-3L across eight patient groups: A multi-country study. *Qual Life Res*  
18 460 2013;22(7):1717–27.  
[https://www.ncbi.nlm.nih.gov/pmc/articles/PMC3764313/pdf/11136\\_2012\\_Article\\_322.pdf](https://www.ncbi.nlm.nih.gov/pmc/articles/PMC3764313/pdf/11136_2012_Article_322.pdf).
- 19 26 Ramsey SD, Willke RJ, Glick H, et al. Cost-effectiveness analysis alongside clinical trials II-An  
20 ISPOR Good Research Practices Task Force report. *Value Health* 2015;18(2):161–72.
- 21 27 Fehrenbacher JW, Siderys H, Terry C, et al. Early and late results of descending thoracic and  
22 thoracoabdominal aortic aneurysm open repair with deep hypothermia and circulatory arrest. *J*  
23 465 *Thorac Cardiovasc Surg* 2010;140(6, Supplement):S154-S160.
- 24 28 Zoli S, Roder F, Etz CD, et al. Predicting the Risk of Paraplegia After Thoracic and  
25 Thoracoabdominal Aneurysm Repair. *Ann Thorac Surg* 2010;90(4):1237–45.
- 26 29 Coselli JS, LeMaire SA, Preventza O, et al. Outcomes of 3309 thoracoabdominal aortic  
27 470 aneurysm repairs. *J Thorac Cardiovasc Surg* 2016;151(5):1323–37.
- 28 30 Katsargyris A, Oikonomou K, Kouvelos G, et al. Spinal cord ischemia after endovascular repair  
29 of thoracoabdominal aortic aneurysms with fenestrated and branched stent grafts. *J Vasc Surg*  
30 2015;62(6):1450–56.
- 31 31 Bisdas T, Panuccio G, Sugimoto M, et al. Risk factors for spinal cord ischemia after  
32 475 endovascular repair of thoracoabdominal aortic aneurysms. *J Vasc Surg* 2015;61(6):1408–16.
- 33 32 Dias NV, Sonesson B, Kristmundsson T, et al. Short-term outcome of spinal cord ischemia after  
34 endovascular repair of thoracoabdominal aortic aneurysms. *European Journal of Vascular and*  
35 *Endovascular Surgery* 2015;49(4):403–09.
- 36 33 Riley RD, Higgins JPT, Deeks JJ. Interpretation of random effects meta-analyses. *BMJ*  
37 480 2011;342:d549.
- 38 34 O'Brien PC, Fleming TR. A multiple testing procedure for clinical trials. *Biometrics*  
39 1979;35(3):549–56.
- 40 35 Hintze J. PASS. NCSS, LLC. Kaysville, Utah, USA.: PASS 11 2011.
- 41 36 Aitkin M. The Analysis of Unbalanced Cross-Classifications. *Journal of the Royal Statistical*  
42 485 *Society. Series A (General)* 1978;141(2):195.
- 43 37 Nelder JA. A Reformulation of Linear Models. *Journal of the Royal Statistical Society. Series A*  
44 *(General)* 1977;140(1):48.
- 45 38 Stenberg K, Lauer JA, Gkountouras G, et al. Econometric estimation of WHO-CHOICE  
46 country-specific costs for inpatient and outpatient health service delivery. *Cost Eff Resour Alloc*  
47 490 2018;16:11.
- 48 39 Ludwig K, Graf von der Schulenburg J-M, Greiner W. German Value Set for the EQ-5D-5L.  
49 *Pharmacoeconomics* 2018;36(6):663–74.  
50  
51  
52  
53  
54  
55  
56  
57  
58  
59  
60



### Authors' contributions

495 DP: study conception and design, statistical methods and sample size calculations, writing and  
reviewing of the manuscript. MC, TK, GM, KvA, JH: study design with particular focus on  
cardiovascular endpoints, reviewing of the manuscript. LL: study design with particular focus  
on radiological methods, reviewing of the manuscript. PN, KP: study design, ethics, data  
management, writing and reviewing of the manuscript. JP: study design with particular focus  
500 on neurological methods and endpoints, reviewing of the manuscript. DE: study design with  
particular focus on health economics and patient satisfaction, reviewing of the manuscript.  
NR: study design for portion on qualitative patient satisfaction, reviewing of the manuscript.  
CDE: research that lay foundation for trial, initial study conception, study design, writing and  
reviewing of the manuscript. All authors have read and approved the final manuscript.

### 505 Funding statement

This project has received funding from the European Union's Horizon 2020 research and  
innovation programme under grant agreement 733203 and from the German Research  
Foundation under grant number ET 127/2-1.

### Competing interests statement

510 The authors have no competing interests related to this trial.

### Figure Legends

515 **Figure 1:** Schematic portrayal of the participant timeline and visit schedule for the PAPAartis  
trial.

max. 6 months

BMJ Open

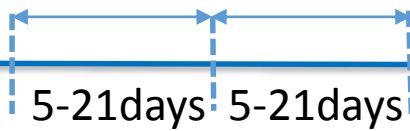

1  
2  
3  
4  
5  
6  
7  
8  
9  
10  
11  
12  
13  
14  
15  
16  
17  
18  
19  
20  
21  
22  
23  
24  
25  
26  
27  
28  
29  
30  
31  
32  
33  
34  
35  
36  
37  
38  
39  
40  
41

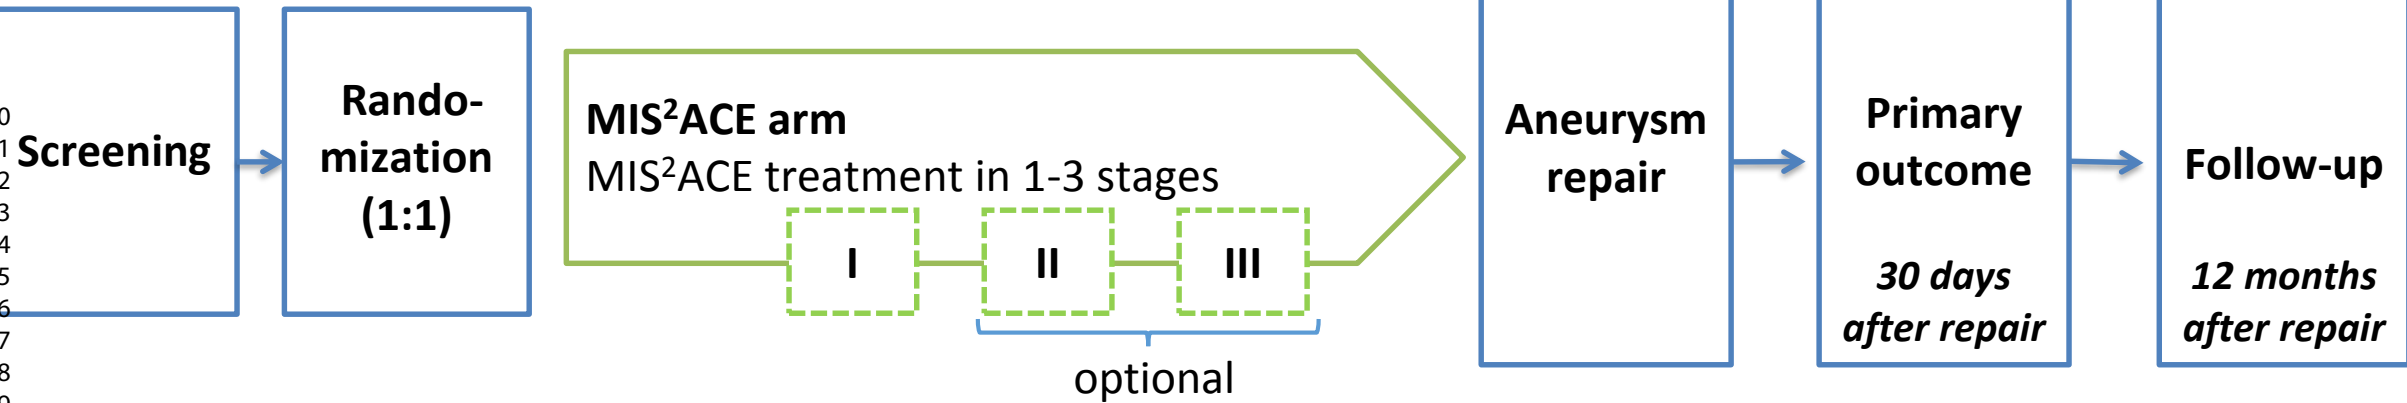

max. 6 months

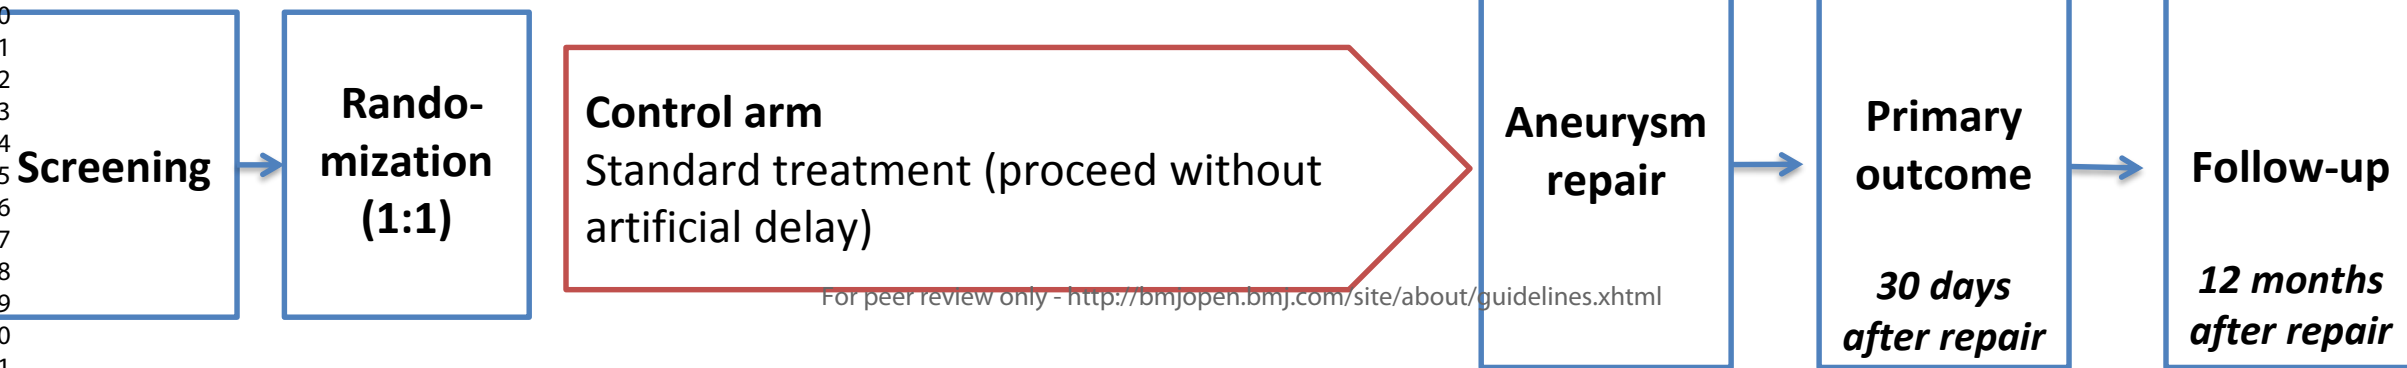

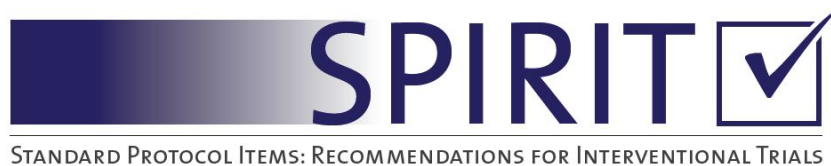

SPIRIT 2013 Checklist: Recommended items to address in a clinical trial protocol and related documents\*

| Section/item                      | Item No | Description                                                                                                                                                                                                                                                                                                           |
|-----------------------------------|---------|-----------------------------------------------------------------------------------------------------------------------------------------------------------------------------------------------------------------------------------------------------------------------------------------------------------------------|
| <b>Administrative information</b> |         |                                                                                                                                                                                                                                                                                                                       |
| Title                             | 1       | Descriptive title identifying the study design, population, interventions, and, if applicable, trial acronym<br><br><i>Title page</i>                                                                                                                                                                                 |
| Trial registration                | 2a      | Trial identifier and registry name. If not yet registered, name of intended registry<br><br><i>End of Abstract</i>                                                                                                                                                                                                    |
|                                   | 2b      | All items from the World Health Organization Trial Registration Data Set<br><br><i>Available through the <a href="http://clinicaltrials.gov">clinicaltrials.gov</a> website and in the full trial protocol</i>                                                                                                        |
| Protocol version                  | 3       | Date and version identifier<br><br><i>Not applicable</i>                                                                                                                                                                                                                                                              |
| Funding                           | 4       | Sources and types of financial, material, and other support<br><br><i>Lines 508-510</i>                                                                                                                                                                                                                               |
| Roles and responsibilities        | 5a      | Names, affiliations, and roles of protocol contributors<br><br><i>Lines 496-506</i>                                                                                                                                                                                                                                   |
|                                   | 5b      | Name and contact information for the trial sponsor<br><br><i>Not applicable (there is no legal "sponsor" function, but the coordinating investigator was named)</i>                                                                                                                                                   |
|                                   | 5c      | Role of study sponsor and funders, if any, in study design; collection, management, analysis, and interpretation of data; writing of the report; and the decision to submit the report for publication, including whether they will have ultimate authority over any of these activities<br><br><i>Not applicable</i> |

- 1  
2  
3  
4  
5  
6  
7  
8  
9
- 5d Composition, roles, and responsibilities of the coordinating centre, steering committee, endpoint adjudication committee, data management team, and other individuals or groups overseeing the trial, if applicable (see Item 21a for data monitoring committee)

*Described throughout paper*

10  
11

## Introduction

- 12  
13  
14  
15  
16
- Background and rationale 6a Description of research question and justification for undertaking the trial, including summary of relevant studies (published and unpublished) examining benefits and harms for each intervention

17  
18

*Line 32-44*

- 19  
20  
21
- 6b Explanation for choice of comparators

22  
23

*Lines 116-119*

- 24  
25
- Objectives 7 Specific objectives or hypotheses

26  
27

*Lines 45-47*

- 28  
29  
30  
31  
32
- Trial design 8 Description of trial design including type of trial (eg, parallel group, crossover, factorial, single group), allocation ratio, and framework (eg, superiority, equivalence, noninferiority, exploratory)

33  
34

*Lines 49-51*

35  
36

## Methods: Participants, interventions, and outcomes

- 37  
38  
39  
40  
41
- Study setting 9 Description of study settings (eg, community clinic, academic hospital) and list of countries where data will be collected. Reference to where list of study sites can be obtained

42  
43

*Lines 54-64*

- 44  
45  
46  
47  
48
- Eligibility criteria 10 Inclusion and exclusion criteria for participants. If applicable, eligibility criteria for study centres and individuals who will perform the interventions (eg, surgeons, psychotherapists)

49  
50

*Lines 66-89*

- 51  
52  
53  
54
- Interventions 11a Interventions for each group with sufficient detail to allow replication, including how and when they will be administered

55  
56  
57  
58  
59  
60

*Lines 91-118*

1  
2  
3  
4  
5  
6  
7  
8  
9  
10  
11  
12  
13  
14  
15  
16  
17  
18  
19  
20  
21  
22  
23  
24  
25  
26  
27  
28  
29  
30  
31  
32  
33  
34  
35  
36  
37  
38  
39  
40  
41  
42  
43  
44  
45  
46  
47  
48  
49  
50  
51  
52  
53  
54  
55  
56  
57  
58  
59  
60

- 11b Criteria for discontinuing or modifying allocated interventions for a given trial participant (eg, drug dose change in response to harms, participant request, or improving/worsening disease)
- Lines 119-121*
- 11c Strategies to improve adherence to intervention protocols, and any procedures for monitoring adherence (eg, drug tablet return, laboratory tests)
- Lines 309-317*
- 11d Relevant concomitant care and interventions that are permitted or prohibited during the trial
- Not applicable*
- Outcomes 12 Primary, secondary, and other outcomes, including the specific measurement variable (eg, systolic blood pressure), analysis metric (eg, change from baseline, final value, time to event), method of aggregation (eg, median, proportion), and time point for each outcome. Explanation of the clinical relevance of chosen efficacy and harm outcomes is strongly recommended
- Lines 124-176*
- Participant timeline 13 Time schedule of enrolment, interventions (including any run-ins and washouts), assessments, and visits for participants. A schematic diagram is highly recommended (see Figure)
- Figure 1*
- Sample size 14 Estimated number of participants needed to achieve study objectives and how it was determined, including clinical and statistical assumptions supporting any sample size calculations
- Lines 184-198*
- Recruitment 15 Strategies for achieving adequate participant enrolment to reach target sample size
- Lines 199-207*

## Methods: Assignment of interventions (for controlled trials)

### Allocation:

1  
2 Sequence generation 16a Method of generating the allocation sequence (eg, computer-generated random numbers), and list of any factors for stratification. To reduce predictability of a random sequence, details of any planned restriction (eg, blocking) should be provided in a separate document that is unavailable to those who enrol participants or assign interventions

3  
4  
5  
6  
7  
8  
9  
10  
11 *Lines 209-211*

12 Allocation concealment mechanism 16b Mechanism of implementing the allocation sequence (eg, central telephone; sequentially numbered, opaque, sealed envelopes), describing any steps to conceal the sequence until interventions are assigned

13  
14  
15  
16  
17  
18  
19 *Lines 213-214*

20 Implementation 16c Who will generate the allocation sequence, who will enrol participants, and who will assign participants to interventions

21  
22  
23  
24  
25 *Line 211*

26 Blinding (masking) 17a Who will be blinded after assignment to interventions (eg, trial participants, care providers, outcome assessors, data analysts), and how

27  
28  
29  
30  
31  
32 *Not applicable (discussed as limitation)*

33 17b If blinded, circumstances under which unblinding is permissible, and procedure for revealing a participant's allocated intervention during the trial

34  
35  
36  
37  
38  
39 *Not applicable*

#### 40 **Methods: Data collection, management, and analysis**

41  
42 Data collection methods 18a Plans for assessment and collection of outcome, baseline, and other trial data, including any related processes to promote data quality (eg, duplicate measurements, training of assessors) and a description of study instruments (eg, questionnaires, laboratory tests) along with their reliability and validity, if known. Reference to where data collection forms can be found, if not in the protocol

43  
44  
45  
46  
47  
48  
49  
50  
51  
52 *Lines 142, 219-227*

53 18b Plans to promote participant retention and complete follow-up, including list of any outcome data to be collected for participants who discontinue or deviate from intervention protocols

54  
55  
56  
57  
58  
59  
60 *Not applicable (since intervention always well documented and short-term and mortality data are expected to be very complete)*

1  
2  
3  
4  
5  
6  
7  
8  
9  
10  
11  
12  
13  
14  
15  
16  
17  
18  
19  
20  
21  
22  
23  
24  
25  
26  
27  
28  
29  
30  
31  
32  
33  
34  
35  
36  
37  
38  
39  
40  
41  
42  
43  
44  
45  
46  
47  
48  
49  
50  
51  
52  
53  
54  
55  
56  
57  
58  
59  
60

- Data management 19 Plans for data entry, coding, security, and storage, including any related processes to promote data quality (eg, double data entry; range checks for data values). Reference to where details of data management procedures can be found, if not in the protocol
- Lines 229-244*
- Statistical methods 20a Statistical methods for analysing primary and secondary outcomes. Reference to where other details of the statistical analysis plan can be found, if not in the protocol
- Lines 263-276*
- 20b Methods for any additional analyses (eg, subgroup and adjusted analyses)
- Lines 282-305*
- 20c Definition of analysis population relating to protocol non-adherence (eg, as randomised analysis), and any statistical methods to handle missing data (eg, multiple imputation)
- Lines 247-261*
- Methods: Monitoring**
- Data monitoring 21a Composition of data monitoring committee (DMC); summary of its role and reporting structure; statement of whether it is independent from the sponsor and competing interests; and reference to where further details about its charter can be found, if not in the protocol. Alternatively, an explanation of why a DMC is not needed
- Lines 365-376*
- 21b Description of any interim analyses and stopping guidelines, including who will have access to these interim results and make the final decision to terminate the trial
- Lines 194, 277-281, 371-372*
- Harms 22 Plans for collecting, assessing, reporting, and managing solicited and spontaneously reported adverse events and other unintended effects of trial interventions or trial conduct
- Lines 172-179, 342-345*



1  
2 Auditing 23 Frequency and procedures for auditing trial conduct, if any, and  
3 whether the process will be independent from investigators and the  
4 sponsor  
5

6  
7 *Lines 318-340, 365-380*  
8

9 **Ethics and dissemination**

10  
11 Research ethics 24 Plans for seeking research ethics committee/institutional review board  
12 approval (REC/IRB) approval  
13

14  
15 *Lines 357-361*  
16

17 Protocol amendments 25 Plans for communicating important protocol modifications (eg,  
18 changes to eligibility criteria, outcomes, analyses) to relevant parties  
19 (eg, investigators, REC/IRBs, trial participants, trial registries, journals,  
20 regulators)  
21

22  
23 *Line 362.*  
24

25 Consent or assent 26a Who will obtain informed consent or assent from potential trial  
26 participants or authorised surrogates, and how (see Item 32)  
27

28  
29 *Not applicable (part of trial protocol and delegation lists, but too  
30 technical for manuscript)*  
31

32 26b Additional consent provisions for collection and use of participant data  
33 and biological specimens in ancillary studies, if applicable  
34

35  
36 *Not applicable*  
37

38 Confidentiality 27 How personal information about potential and enrolled participants will  
39 be collected, shared, and maintained in order to protect confidentiality  
40 before, during, and after the trial  
41

42  
43 *Not applicable (part of full protocol, but too technical and detailed for  
44 this manuscript).*  
45

46 Declaration of interests 28 Financial and other competing interests for principal investigators for  
47 the overall trial and each study site  
48

49  
50 *Not applicable (site contracts are confidential).*  
51

52 Access to data 29 Statement of who will have access to the final trial dataset, and  
53 disclosure of contractual agreements that limit such access for  
54 investigators  
55

56  
57 *Not applicable (not regulated contractually).*  
58  
59  
60

|    |                   |     |                                                                                  |
|----|-------------------|-----|----------------------------------------------------------------------------------|
| 1  |                   |     |                                                                                  |
| 2  | Ancillary and     | 30  | Provisions, if any, for ancillary and post-trial care, and for                   |
| 3  | post-trial care   |     | compensation to those who suffer harm from trial participation                   |
| 4  |                   |     |                                                                                  |
| 5  |                   |     | <i>Not applicable (insurance provided for all patients however).</i>             |
| 6  |                   |     |                                                                                  |
| 7  | Dissemination     | 31a | Plans for investigators and sponsor to communicate trial results to              |
| 8  | policy            |     | participants, healthcare professionals, the public, and other relevant           |
| 9  |                   |     | groups (eg, via publication, reporting in results databases, or other            |
| 10 |                   |     | data sharing arrangements), including any publication restrictions               |
| 11 |                   |     |                                                                                  |
| 12 |                   |     | <i>Lines 382-394</i>                                                             |
| 13 |                   |     |                                                                                  |
| 14 |                   |     |                                                                                  |
| 15 |                   | 31b | Authorship eligibility guidelines and any intended use of professional           |
| 16 |                   |     | writers                                                                          |
| 17 |                   |     |                                                                                  |
| 18 |                   |     | <i>Not applicable (will be decided within consortium at later date).</i>         |
| 19 |                   |     |                                                                                  |
| 20 |                   |     |                                                                                  |
| 21 |                   | 31c | Plans, if any, for granting public access to the full protocol, participant-     |
| 22 |                   |     | level dataset, and statistical code                                              |
| 23 |                   |     |                                                                                  |
| 24 |                   |     | <i>Not applicable (will be decided within consortium at later date).</i>         |
| 25 |                   |     |                                                                                  |
| 26 |                   |     |                                                                                  |
| 27 | <b>Appendices</b> |     |                                                                                  |
| 28 |                   |     |                                                                                  |
| 29 | Informed consent  | 32  | Model consent form and other related documentation given to                      |
| 30 | materials         |     | participants and authorised surrogates                                           |
| 31 |                   |     |                                                                                  |
| 32 |                   |     | <i>Not applicable (part of full protocol, but too technical and detailed for</i> |
| 33 |                   |     | <i>this manuscript).</i>                                                         |
| 34 |                   |     |                                                                                  |
| 35 |                   |     |                                                                                  |
| 36 | Biological        | 33  | Plans for collection, laboratory evaluation, and storage of biological           |
| 37 | specimens         |     | specimens for genetic or molecular analysis in the current trial and for         |
| 38 |                   |     | future use in ancillary studies, if applicable                                   |
| 39 |                   |     |                                                                                  |
| 40 |                   |     | <i>Not applicable (part of full protocol, but too technical and detailed for</i> |
| 41 |                   |     | <i>this manuscript).</i>                                                         |
| 42 |                   |     |                                                                                  |
| 43 |                   |     |                                                                                  |

---

\*It is strongly recommended that this checklist be read in conjunction with the SPIRIT 2013 Explanation & Elaboration for important clarification on the items. Amendments to the protocol should be tracked and dated. The SPIRIT checklist is copyrighted by the SPIRIT Group under the Creative Commons "[Attribution-NonCommercial-NoDerivs 3.0 Unported](https://creativecommons.org/licenses/by-nc-nd/3.0/)" license.

# BMJ Open

## Paraplegia Prevention in Aortic Aneurysm Repair by Thoracoabdominal Staging with 'Minimally-Invasive Staged Segmental Artery Coil-Embolization' (MIS<sup>2</sup>ACE): Trial protocol for a Randomized Controlled Multicentre Trial

|                                 |                                                                                                                                                                                                                                                                                                                                                                                                                                                                                                                                                                                                                                                                                                                                                                                                                                                                                                                                                                                                                                         |
|---------------------------------|-----------------------------------------------------------------------------------------------------------------------------------------------------------------------------------------------------------------------------------------------------------------------------------------------------------------------------------------------------------------------------------------------------------------------------------------------------------------------------------------------------------------------------------------------------------------------------------------------------------------------------------------------------------------------------------------------------------------------------------------------------------------------------------------------------------------------------------------------------------------------------------------------------------------------------------------------------------------------------------------------------------------------------------------|
| Journal:                        | <i>BMJ Open</i>                                                                                                                                                                                                                                                                                                                                                                                                                                                                                                                                                                                                                                                                                                                                                                                                                                                                                                                                                                                                                         |
| Manuscript ID                   | bmjopen-2018-025488.R2                                                                                                                                                                                                                                                                                                                                                                                                                                                                                                                                                                                                                                                                                                                                                                                                                                                                                                                                                                                                                  |
| Article Type:                   | Protocol                                                                                                                                                                                                                                                                                                                                                                                                                                                                                                                                                                                                                                                                                                                                                                                                                                                                                                                                                                                                                                |
| Date Submitted by the Author:   | 30-Jan-2019                                                                                                                                                                                                                                                                                                                                                                                                                                                                                                                                                                                                                                                                                                                                                                                                                                                                                                                                                                                                                             |
| Complete List of Authors:       | Petroff, David; University of Leipzig, Clinical Trial Centre<br>Czerny, Martin; Universitäts-Herzzentrum Freiburg Bad Krozingen GmbH; Albert-Ludwigs-Universität Freiburg Medizinische Fakultät<br>Kölbl, Tilo; University heart center hamburg, Department of Vascular Medicine<br>Melissano, Germano; Università Vita Salute San Raffaele, Division of Vascular Surgery<br>Lonn, Lars; Rigshospitalet, Department of (Interventional) Radiology<br>Haunschild, Josephina; University Heart Center Leipzig, Department of Cardiac Surgery<br>von Aspern, Konstantin; University Heart Center Leipzig, Department of Cardiac Surgery<br>Neuhaus, Petra; University of Leipzig, Clinical Trial Centre<br>Pelz, Johann; Universitätsklinikum Leipzig, Department of Neurology<br>EPSTEIN, DAVID; Universidad de Granada - Campus de Cartuja, Economía Aplicada<br>Romo-Avilés, Nuria<br>Piotrowski, Katja; University of Leipzig, Clinical Trial Centre<br>Etz, Christian; University Heart Center Leipzig, Department of Cardiac Surgery |
| <b>Primary Subject Heading</b>: | Cardiovascular medicine                                                                                                                                                                                                                                                                                                                                                                                                                                                                                                                                                                                                                                                                                                                                                                                                                                                                                                                                                                                                                 |
| Secondary Subject Heading:      | Neurology                                                                                                                                                                                                                                                                                                                                                                                                                                                                                                                                                                                                                                                                                                                                                                                                                                                                                                                                                                                                                               |
| Keywords:                       | Thoracoabdominal aortic aneurysms, TAAA, spinal cord injury, SCI, segmental artery coil embolization, MISACE                                                                                                                                                                                                                                                                                                                                                                                                                                                                                                                                                                                                                                                                                                                                                                                                                                                                                                                            |
|                                 |                                                                                                                                                                                                                                                                                                                                                                                                                                                                                                                                                                                                                                                                                                                                                                                                                                                                                                                                                                                                                                         |

SCHOLARONE™  
Manuscripts

1  
2  
3 **Paraplegia Prevention in Aortic Aneurysm Repair by Thoracoabdominal**  
4 **Staging with ‘Minimally-Invasive Staged Segmental Artery Coil-**  
5 **Embolization’ (MIS<sup>2</sup>ACE): Trial protocol for a Randomized Controlled**  
6 **Multicentre Trial**  
7  
8  
9  
10

11 David Petroff,<sup>1</sup> Martin Czerny,<sup>2,3</sup> Tilo Kölbel,<sup>4</sup> Germano Melissano,<sup>5</sup> Lars Lonn,<sup>6</sup> Josephina  
12 Haunschild,<sup>7</sup> Konstantin von Aspern,<sup>7</sup> Petra Neuhaus,<sup>1</sup> Johann Pelz,<sup>8</sup> David Epstein,<sup>9</sup> Nuria  
13 Romo-Avilés,<sup>10</sup> Katja Piotrowski,<sup>1</sup> Christian D Etz<sup>7</sup>  
14  
15  
16

17 <sup>1</sup> Clinical Trial Centre, University of Leipzig, Germany

18 <sup>2</sup> University Heart Center Freiburg-Bad Krozingen, Germany

19 <sup>3</sup> Faculty of Medicine, Albert Ludwigs University Freiburg, Germany

20 <sup>4</sup> German Aortic Center Hamburg, Department of Vascular Medicine, University Heart  
21 Center, Hamburg, Germany

22 <sup>5</sup> Division of Vascular Surgery, "Vita-Salute" University, IRCCS San Raffaele Scientific  
23 Institute, Milan, Italy

24 <sup>6</sup> Department of (Interventional) Radiology, Rigshospitalet, National Hospital and University  
25 of Copenhagen, Denmark

26 <sup>7</sup> University Department of Cardiac Surgery, Leipzig Heart Center, Germany

27 <sup>8</sup> Department of Neurology, Leipzig University Hospital, Germany

28 <sup>9</sup> Department of Applied Economics, University of Granada, Spain.

29 <sup>10</sup> Department of Social Anthropology, University of Granada, Spain.  
30  
31  
32  
33  
34  
35  
36  
37  
38  
39  
40  
41  
42  
43

44 **Corresponding author:**

45 David Petroff (for the journal and questions regarding trial design)

46 Clinical Trial Centre, University of Leipzig

47 Haertelstr. 16-18, 04107 Leipzig, Germany

48 +49 341 9716354

49 [David.Petroff@zks.uni-leipzig.de](mailto:David.Petroff@zks.uni-leipzig.de)

50  
51 Christian Etz (for medical questions)

52 [Chrsitian.Etz@medizin.uni-leipzig.de](mailto:Chrsitian.Etz@medizin.uni-leipzig.de)  
53  
54  
55

56 **Word count:** 3956

57  
58 **Keywords:** Thoracoabdominal aortic aneurysms, TAAA, spinal cord injury, SCI, segmental  
59 artery coil embolization, MIS<sup>2</sup>ACE  
60

## ABSTRACT

**Introduction** Spinal cord injury (SCI) including permanent paraplegia constitutes a common complication after repair of thoracoabdominal aortic aneurysms. The staged-repair concept promises to provide protection by inducing arteriogenesis so that the collateral network can provide a robust blood supply to the spinal cord after intervention. Minimally invasive staged segmental artery coil embolization (MIS<sup>2</sup>ACE) has been proved recently to be a feasible enhanced approach to staged repair.

**Methods and analysis** This randomized controlled trial (RCT) uses a multi-centre, multinational, parallel group design, where 500 patients will be randomized in a 1:1 ratio to standard aneurysm repair or to MIS<sup>2</sup>ACE in 1-3 sessions followed by repair. Before randomization, physicians document whether open or endovascular repair is planned. The primary endpoint is successful aneurysm repair without substantial SCI 30 days after aneurysm repair. Secondary endpoints include any form of SCI, mortality (up to one year), length of stay in the intensive care unit (ICU), costs and quality of life adjusted years (QALYs). A generalized linear mixed model will be used with the logit link function and randomization arm, mode of repair (open or endovascular repair), the Crawford type and the euroSCORE II as fixed effects and the centre as a random effect. Safety endpoints include kidney failure, respiratory failure and embolic events (also from debris). A qualitative study will explore patient perceptions.

**Ethics and dissemination** This trial has been approved by the lead Ethics Committee from the University of Leipzig (435/17-ek) and will be reviewed by each of the Ethics Committees at the trial sites. A dedicated project is coordinating communication and dissemination of the trial.

**Trial registration number** NCT03434314

### Strengths and limitations of this study

- Large multicentre randomized controlled trial RCT in aortic surgery addressing a fundamental issue in thoracoabdominal aortic aneurysm TAAA repair
- Includes open and endovascular repair
- Provides 1-year data on SCI and mortality
- Looks at potential reductions in bleeding complications and endoleaks

- Cannot be blinded

## INTRODUCTION

This publication describes the study design and protocol of a clinical trial on Paraplegia Prevention in Aortic Aneurysm Repair by Thoracoabdominal Staging (“PAPAartis”) and follows the SPIRIT recommendations very closely (“Standard Protocol Items: Recommendations for Interventional Trials”).[1, 2]

### Background

Aortic aneurysms are permanent and localized dilations of particular portions of the aorta that grow unpredictably, but with a mean estimated rate of about two millimetres per year[3] and remain asymptomatic for long periods of time. Based on the aneurysm localization, one can distinguish between thoracic, abdominal and thoracoabdominal aortic aneurysms (TAAA). The latter are complex and generally categorized according to the Crawford classification (type I-IV), based on the anatomic extent of the aneurysm.[4–6]

A study comparing a historic cohort to a matched treated population showed that the dismal five-year survival rate of 13% given the natural course of the disease could be increased to 61% with open surgical repair.[7] Although successful aortic repair cures the disease, both open and endovascular modalities can result in paraplegia from spinal cord ischaemia and mortality is high. This particularly affects patients with aneurysms extending from the thoracic to the abdominal aorta and thus involving many segmental arteries (SAs) supplying the spinal cord. It has been assumed that paraplegia in open repair arises primarily due to temporary interruption of spinal cord blood supply during the operative procedure with a duration sufficient to damage cell bodies and nerve tracts in the spinal cord irreversibly. In endovascular repair, the chronic occlusion of several segmental arteries (as well as the temporary compromising of internal iliac blood supply during the procedure) induces paraplegia with a comparable incidence.[8] Various adjunctive perioperative neuroprotective strategies, such as motor/somatosensory evoked potential monitoring, meticulous perioperative blood pressure management, cerebrospinal fluid (CSF) drainage and even local spinal cord cooling, have been introduced to minimize ischaemic spinal cord injury (SCI).[9] These methods have achieved a notable decrease in the incidence of paraplegia and paraparesis, but it remains high with an incidence of up to 20% for Crawford type II aneurysms.[10]

## Rationale

Members of the study team have found that the deliberate staged occlusion of segmental arteries leading to the paraspinous collateral network and finally supplying the spinal cord can trigger arterial collateralization, thus stabilizing blood supply to the spinal cord from alternate inflow sources and potentially preventing ischaemia.[11–16] This approach was devised after years of research that included recognition of the body’s ability to tolerate segmental artery sacrifice[17] given haemodynamic stability[18, 19] along with the identification of the paraspinous arterial collateral network itself.[12, 16] One means of occluding arteries in the clinical setting has been termed ‘minimally invasive staged segmental artery coil embolization’ (MIS<sup>2</sup>ACE), which was proved feasible in 2015.[20] A consecutive case series of over 50 patients lends credence to its safety.[21] This is thus the ideal time to carry out such a trial – where the need to test efficacy, effectiveness and safety are paramount, but before it has gained acceptance despite lack of evidence.

## Objectives

The primary objective of the PAPAartis trial is to test the hypothesis that MIS<sup>2</sup>ACE can greatly reduce the incidence of ischaemic SCI and mortality compared to standard open surgical or endovascular thoracoabdominal aneurysm repair alone.

## Trial Design

PAPAartis is a multi-national, open label, randomized controlled trial. It has two parallel groups with equal allocation and the primary endpoint is to be tested in a superiority framework.



## METHODS AND ANALYSIS

### Study setting

To demonstrate the efficacy of MIS<sup>2</sup>ACE while minimizing risks, we chose participating sites with great expertise in the treatment of TAAA and tried to create a balance between those specializing in open and those in endovascular repair. The trial is jointly funded by the European Union as part of the Horizon 2020 programme and by the German Research Foundation, resulting in sites exclusively in Europe and with a strong emphasis on Germany. The recruiting sites (n=29) at commencement of the trial come from Austria (n=2), France (n=2), Germany (n=16), Italy (n=2), the Netherlands (n=1), Poland (n=2), Sweden (n=2), Switzerland (n=1) and the United Kingdom (n=1). In addition, Denmark provides an independent radiological core unit, Spain heads projects on health economics and patient satisfaction, the USA provide expert advice and Scotland heads a project on communication and dissemination. Patient recruitment will begin imminently and is planned to last two years.

### Eligibility criteria

#### *Inclusion criteria*

1. TAAA, Crawford type II or III (verified by radiological core unit)
2. planned open or endovascular repair of aneurysm within four months
3.  $\geq 18$  years old

The inclusion criteria are chosen to select a high risk (Crawford type II and III) population amenable to MIS<sup>2</sup>ACE therapy.

#### *Key exclusion criteria*

1. complicated (sub-) acute type B aortic dissection (but all chronic type B dissections will be included)
2. ruptured and urgent aneurysm (emergencies)
3. untreated aortic arch aneurysm (patients with a previous successful aortic arch aneurysm repair may be included independent of technique used)
4. bilaterally occluded iliac arteries or chronic total occlusion of left subclavian artery
5. pre-operative neurological deficits or spinal cord dysfunction
6. major untreated cardio-pulmonary disease
7. life-expectancy of less than one year
8. high risk for segmental artery embolism ('shaggy' aorta)

1  
2  
3 9. severe contrast agent allergy, severe reduction in glomerular filtration rate  
4  
5

6 The first two exclusion criteria were chosen since patients should not be subjected to  
7 85 additional risk as a result of the waiting time in the MIS<sup>2</sup>ACE arm before TAAA repair can be  
8 performed. The third exclusion criterion was chosen since these patients have considerable  
9 risk unrelated to the focus of the trial. Exclusion criterion 4 was chosen, since sufficient blood  
10 supply after MIS<sup>2</sup>ACE cannot be guaranteed on the one hand, and the prior occlusion implies  
11 that no additional treatment options are available in this anatomic region.  
12  
13  
14  
15

16 90 **Intervention**  
17

18 An overview of the trial is provided in Fig. 1. The treating physicians choose the mode of  
19 repair, after which the patient is randomized to the interventional or the control arm.  
20  
21

22 In the interventional arm (MIS<sup>2</sup>ACE), segmental arteries (SAs) will be occluded in one to  
23 three sessions some weeks before the aneurysm repair. Target SAs for coil/plug deployment  
24 will be identified considering the extent of the planned repair and individual SA anatomy. The  
25 95 occlusion of up to 7 SAs will be performed in a single session and conducted through a  
26 peripheral artery access (e.g. the common femoral artery) in local anaesthesia. Local  
27 anaesthesia is important so that patients can provide immediate feedback regarding potential  
28 neurological symptoms. Selected SAs will be catheterized (e.g. with a 5F catheter or 2.7F  
29 microcatheter). Microcoils or vascular plugs will be used for the occlusion itself, not however  
30 100 particles, which could cause unwanted microembolisms to the spinal cord directly. This will  
31 be performed in the proximal SA to ensure that the collateral network itself is not affected.  
32 The procedure may be done without spinal fluid drainage but this is left at the discretion of  
33 the centre. The length of the procedure, the amount of contrast dye and the dose of radiation  
34 105 will be documented exactly. The recommended interval between sessions is 21 days, with a  
35 strict safety minimum of 5 days.[11] Experts in endovascular catheterization in small vessels  
36 (e.g. cardiovascular surgeons, interventionalists, endovascular surgeons, interventional  
37 radiologists, paediatric cardiologists) will perform MIS<sup>2</sup>ACE. It is essential to maintain blood  
38 pressure above 140 mmHg, but for hypertensive patients, it is imperative that the post-  
39 110 operative pressure should not fall below their individual pre-operative systolic blood pressure  
40 during and after the procedure (invasive monitoring), ideally for at least 2 days. Anti-  
41 hypertensive drugs have to be adjusted accordingly. Therefore, the patient should stay in the  
42 IMCU for at least 48 hours, preferably longer. Reduction or even interruption of oral anti-  
43 hypertensive medication and use of low-dose vasopressors may be utilized and are preferable  
44 115 to volume therapy, which increases central venous pressure and thereby also CSF pressure.  
45  
46  
47  
48  
49  
50  
51  
52  
53  
54  
55  
56  
57  
58  
59  
60

1  
2  
3 In the control arm, treatment will be according to the optimal state-of-the art procedures at the  
4 local site. This ensures a real-world comparison in which the control arm is as strong as  
5 possible.  
6  
7

8  
9 As the trial proceeds, statistical monitoring and concomitant projects may identify need for  
10  
11 120 revisions to the intervention. These alterations will then be adopted with protocol  
12 amendments to optimize patient safety.  
13

## 14 **Endpoints**

### 15 *Primary endpoint*

16  
17  
18  
19 The primary endpoint is successful treatment of the aneurysm. We define “success” as (a) the  
20  
21 125 patient is alive and without substantial SCI 30 days after treatment, and (b) the aneurysm did  
22 not rupture and was excluded within six months of randomization.  
23

24  
25 Patients, who have not been treated within six months of randomization will be treated as  
26 failures to ensure that success/failure is defined for all randomized patients. This facilitates  
27 the intention to treat analysis (see below) and reduces the amount of missing data. During  
28  
29 recruitment, the Trial Steering Committee will ensure that time lapse alone leads only very  
30  
31 130 rarely to failure, otherwise this criterion will be reworked. The definition of success  
32 pertaining to mortality and SCI will be assessed 30 days after TAAA repair and “substantial  
33 SCI” means that the patient is unable to stand without assistance and is defined using the  
34 modified Tarlov scale[22] (see below) and assessed by a board certified neurologist whenever  
35  
36 possible:  
37  
38  
39 135

40  
41 0 – No lower extremity movement

42  
43 1 – Lower extremity motion without gravity

44  
45 2 – Lower extremity motion against gravity

46  
47 3 – Able to stand with assistance

48  
49 4 – Able to walk with assistance

50  
51 140 5 – Normal  
52

53  
54  
55 A training video describing this scale is provided for study personnel.

56  
57  
58 Treatment success for open repair is defined by complete resection and graft replacement in  
59 the absence of major related complications.  
60

1  
2  
3 145 *Secondary endpoints*  
4

5 For secondary endpoints, treatment success will be assessed and based on follow-up CT/MR  
6 images. Treatment success for endovascular repair is defined based on the position paper of  
7 the European Association for Cardio-Thoracic Surgery (EACTS) and the European Society of  
8 Cardiology (ESC), in collaboration with the European Association of Percutaneous  
9 Cardiovascular Interventions (EAPCI)[23] and takes into account upcoming guideline papers.  
10 Failure is defined as substantial progression of the aneurysm sac ( $> 3$  mm) or the presence of  
11 major related complications (e.g. type I/III endoleaks). Completion angiography and/or  
12 follow-up MRI/CT from patients with endovascular repair will be conducted as part of  
13 clinical routine and will be sent to Copenhagen for assessment.  
14  
15  
16  
17  
18  
19  
20

21 155 Note: The point in time “one year” refers to one year after TAAA repair. If patients retained  
22 in the full analysis set have not had a repair, then “30 days after TAAA repair” and “at one  
23 year” will be treated as 30 days and one year after randomization.  
24  
25  
26

- 27 1. Substantial SCI at 30 days after TAAA repair and at one year
- 28 2. SCI according to the modified Tarlov scale from TAAA repair treatment to one year
- 29 3. All-cause mortality at 30 days and one year after TAAA repair
- 30 31 160 4. Length of stay in intensive care unit and intermediate care unit after TAAA repair
- 32 5. Sub-group analyses for open repair and endovascular repair separately
- 33 6. Re-operation for bleeding and drainage volumes in the first 24 h and use of blood
- 34 products (only for open repair)
- 35 7. Cross-clamping times during open surgery
- 36 8. Residual aneurysm sac perfusion, i.e. type II endoleaks (only for endovascular repair)
- 37 9. Health-related quality of life will be collected using the WHOQOL-BREF[24] and the
- 38 EuroQoL EQ-5D-5L instruments.[25] Hospital and other healthcare resource use will
- 39 be collected. Healthcare costs, quality-adjusted life years (QALYs) and the
- 40 165 incremental cost-effectiveness ratio (ICER) over one year will be calculated.[26]
- 41  
42  
43  
44  
45  
46  
47  
48  
49 170

50 *Safety endpoints*

51 Beyond AE/SAE reporting and descriptive statistics on radiation exposure, the following  
52 issues will receive special attention: acute kidney injury (AKI), respiratory failure and  
53 embolic events (also from debris). AKI is defined using the MAKE criteria [27], comparing  
54 baseline to the time-point of the primary outcome, where we note that the nature of the trial  
55 and logistics of the visits preclude the use of MAKE at precisely 90 days (MAKE90). We also  
56 175 record new dialysis separately and deterioration in chronic kidney disease (CKD) stage by at  
57  
58  
59  
60

1  
2  
3 least two stages. Acute and chronic kidney disease will be distinguished. Having identified  
4 particular safety risks in the trial aids us in collecting appropriate data, assessing and reporting  
5 these harms, as recommended by SPIRIT. [1, 2] We do not use these to define stopping  
6  
7 180 criteria however, which is left at the discretion of the Data Monitoring Committee.  
8  
9

### 10 **Participant timeline**

11  
12 Please refer to Fig. 1 for details of the visit schedule and participant timeline.  
13  
14

### 15 **Sample size and recruitment**

16  
17 185 Estimates of effect size are difficult for several reasons. Foremost, there are large  
18 discrepancies between outcome rates quoted in the literature. Moreover, the impact of recent  
19 improvements in techniques on outcomes cannot yet be quantified accurately and, finally the  
20 effect size depends on the improvement due to the trial intervention, which, in turn, depends  
21 on anatomy, post-repair management and other complex factors. Taking a random effects  
22 model of the data from large recent publications for open [10, 28–30] and endovascular repair  
23 [31–33] one finds an estimated incidence of 18% (95% prediction interval 15% to 23%) for  
24 open repair and a very uncertain 24% (2 to 79)% for endovascular repair. The prediction  
25 interval as opposed to the confidence interval provides the correct bounds for what can be  
26 190 expected in the trial.[34] The resources and time available to the study allow for the  
27 recruitment of 500 patients. Assuming success rates of 80% in the control arm and 90% in the  
28 intervention arm and using a group-sequential design [35] with two interim analyses, this then  
29 implies a power of just over 87%.[36] The definitions of the primary endpoint and the full  
30 analysis set imply that only very few dropouts are to be expected for this analysis and that  
31 compliance will not be a problem. The severity of the therapy and recovery times mean that  
32 loss to follow-up is not expected to be a major factor.  
33  
34 195  
35  
36  
37  
38  
39  
40  
41  
42  
43 200  
44

45 The planned recruitment is between 8 and 9 patients per site per year. This is roughly half the  
46 number of patients that meet the inclusion criteria. However, slow recruitment plagues many  
47 trials and mitigation strategies have already been developed. A list of interested recruitment  
48 sites ( $n > 10$ ) is being collected to expand the consortium. Statistical monitoring will be used  
49 to identify reasons for screened patients not being included in the trial so that minor and  
50 clinically justified amendments to the trial protocol can address these issues, e.g. through  
51 adjustments to the inclusion and exclusion criteria. Finally, a newsletter including recruitment  
52 205 by site will be distributed at regular intervals to spawn healthy competition among the team  
53 members.  
54  
55  
56  
57  
58  
59  
60

1  
2  
3 **210 Randomization**  
4

5 Patients will be randomized in a 1:1 ratio to the intervention and control arms with a random  
6 number generator. Randomization will be performed online at the recruitment centres with a  
7 tool prepared and hosted by the Clinical Trial Centre Leipzig  
8

9  
10  
11 Some of the centres are expected to recruit a very small number of patients, meaning that  
12  
13 **215** block randomization stratified by centre is unfeasible. Although minimization schemes could  
14 be used to attain roughly balanced allocation of patients, even at the centre level, there is  
15 controversy about the methods needed to analyse such trials. To avoid potential complexities  
16 in analysis, we have thus opted for a very simple randomization scheme, knowing that small  
17 imbalances in the number of patients per arm are to be expected.  
18  
19  
20

21  
22 **220 Selected data collection methods**  
23

24 Neurological examinations will be performed by board certified neurologists whenever  
25 possible. If such an examination is made upon discharge and no signs of impairment are  
26 found, then verification that this holds at 30 days is only required by telephone. Any signs of  
27 impairment necessitate a full examination at 30 days however.  
28  
29

30  
31  
32 **225** If the assessment of Crawford classification or successful treatment carried out by the  
33 radiological unit in Copenhagen should disagree with the treating physician's opinion, the  
34 blinded independent Endpoint Committee will make the final decision. The definition of  
35 success does not necessarily require that the MRI/CT be made within six months of  
36 randomization. Later verification of success is acceptable.  
37  
38  
39

40  
41 **230 Data management**  
42

43 The EDC tool SecuTrial®, developed and distributed by interActive Systems GmbH, is used  
44 for creation of the study database. Data entry uses eCRF data entry masks and data changes  
45 are tracked automatically including date, time and person who entered/changed information  
46 (audit trail). Major corrections or major missing data have to be explained.  
47  
48  
49

50  
51 **235** The information entered into the eCRF by the investigator or an authorised member of the  
52 study team is systematically checked for completeness, consistency and plausibility by  
53 routines implemented in the database, such that discrepancies can be dealt with at data entry.  
54 Errors and warnings are listed in a validation report and can be resolved at any time during  
55 the data entry process. On completion of data entry, the site staff flags the eCRF-pages as  
56  
57  
58  
59  
60 **240** 'data entry completed'.

1  
2  
3 Throughout the study, a backup of all data is made daily. Unauthorised access to patient data  
4 is prevented by the access concept of the study database, which is based on strict file system  
5 permission.  
6  
7

8  
9 At the end of the study, once the database is complete and accurate, the database will be  
10  
11 245 locked. Subsequent changes to the database are possible only by joint written agreement  
12 between co-ordinating investigator, trial statistician and data manager.  
13  
14

## 15 **Statistical methods**

### 16 *Analysis Sets*

17  
18  
19 If patients retract informed consent before any procedure is performed (repair or SA  
20  
21 250 occlusion), they will be excluded from the primary analysis, since we expect some control  
22 arm patients to be dissatisfied with their assigned treatment, retract consent, and seek  
23 MIS<sup>2</sup>ACE outside of the trial. Including them would be anti-conservative. The full analysis  
24 set (FAS) includes all randomized patients that have had a session for occluding segmental  
25 arteries (intervention arm) or have had a repair procedure (conventional arm). Randomized  
26  
27 255 patients whose aneurysm ruptures or who die from any cause will be included in the FAS,  
28 irrespective of the above stipulations.  
29  
30  
31  
32  
33

34 If a sufficiently large number of patients violate the trial protocol, particularly regarding the  
35 trial intervention, then a per protocol analysis will be performed using the set of patients that  
36 conformed to the major terms in the protocol. A precise definition of the per protocol set will  
37  
38 260 be provided in the statistical analysis plan.  
39  
40

41 Patients are generally analysed regarding safety according to treatment received. In our case,  
42 an undue delay between randomization and treatment is a risk factor, meaning that such  
43 patients will be included in the safety analyses even if they have not yet received treatment.  
44  
45  
46

### 47 *Statistical Analysis*

48  
49 265 The primary analysis is an intention to treat (ITT) analysis based on the FAS and makes use  
50 of a generalized linear mixed model with the logit link function. The success/failure of  
51 treatment will be the dependent variable. The assigned randomization arm, mode of repair  
52 (open or endovascular repair), the Crawford type and the euroSCORE II are fixed effects and  
53 the centre will be treated as a random effect. The euroSCORE II already takes age, sex and  
54  
55 270 other relevant factors into account. The interaction term between the randomization arm and  
56 the other fixed effects will only be included if evidence for a strong interaction effect are seen,  
57  
58  
59  
60



1  
2  
3 since this would otherwise lead to a substantial loss of power.[37, 38] As a supplementary  
4 analysis, an analogous mixed model will be performed with a unity link function to provide  
5 estimates and confidence intervals for absolute risk differences.  
6  
7

8  
9 275 The definitions of the full analysis set and the primary endpoint are chosen so that almost no  
10 missing data are expected. If success cannot be ascertained with certainty, the patient will be  
11 treated as a failure. Sensitivity analyses will be used to gauge the effect of missing data on the  
12 estimates and conclusions drawn.  
13  
14

15  
16 Interim analyses are planned 30 days after 50% of patients (n=250) and 75% (n=375) have  
17  
18 280 been treated for the aneurysm. The primary endpoint will be analysed and randomization can  
19 be terminated for efficacy if a p-value of 0.0030 (first interim analysis) or 0.018 (second  
20 interim analysis) is reached. The p-value for demonstrating efficacy in the final analysis is  
21 0.044.  
22  
23  
24

25  
26 Analysis of binary secondary outcomes will be treated on the same footing as the primary  
27  
28 285 analysis. Mortality at 30 days will be treated as binary as opposed to time-to-event, since  
29 prolonging life in the post-operative phase for a matter of days is not considered clinically  
30 relevant. Subgroup analyses of the two Crawford types and of the two modes of repair will be  
31 presented in the form of contingency tables. Mixed model Cox regression with covariates  
32 euroSCOREII, Crawford type and mode of repair will be used for one-year mortality with  
33 randomization arm as the independent variable of interest and centre as a random effect. If the  
34  
35 290 assumption of proportional hazards is violated substantially, a logistic regression will be used.  
36 Kaplan-Meier curves will be used to represent the data.  
37  
38  
39  
40  
41

42  
43 In explorative analyses, the number of patent segmental arteries and the number occluded will  
44 be taken into account with respect to SCI and mortality. The anatomical position of the  
45  
46 295 segmental arteries may also be used.  
47

48 ICU-time and ICMU-time will be analysed with a linear mixed effects model with the same  
49 fixed and random effects as in the primary analysis and may be log transformed if warranted.  
50 Re-operation for bleeding and type II endoleaks will be presented for the subgroups of  
51 patients treated with open or endovascular repair, respectively.  
52  
53

54  
55 300 Descriptive statistics will be used for further safety outcomes along with odds ratios  
56 according to treatment received, as appropriate.  
57  
58

59 Total mean cost per patient over one year will be estimated by multiplying healthcare  
60 resource use collected in the trial by unit costs from the country health system.[39] QALYs

1  
2  
3 will be calculated in each treatment group using the EQ-5D-5L value set.[40] The ICER will  
4  
5 305 be calculated, and will inform whether MIS<sup>2</sup>ACE is cost-effective on average for patients with  
6  
7 TAAA Crawford type II or III. Bootstrap methods will be used to characterize  
8  
9 uncertainty.[26]

10  
11 Further details will be provided in a statistical analysis plan.

### 12 13 **Statistical monitoring**

14  
15 310 The trial conduct will be closely supervised by means of central and statistical monitoring.  
16  
17 The objectives are a) to detect safety relevant signals as soon as possible, b) to detect non-  
18  
19 compliance and relevant protocol violations and to prevent their future occurrence by prompt  
20  
21 reaction, c) to prevent missing visits or measurements by prompt reminders and d) to explore  
22  
23 means of improving on the MIS<sup>2</sup>ACE procedure.

24  
25 315 Statistical and central monitoring will start immediately after inclusion of the first patient. The  
26  
27 relevant reports and descriptive statistics will be updated and discussed at the regular  
28  
29 meetings of the Leipzig study team. Problems and abnormalities will be presented at regular  
30  
31 intervals to the co-ordinating investigator.

### 32 33 **On-site monitoring**

34  
35 320 A risk-based monitoring strategy will be implemented as required by ICH E6 (Chapter 5.0)  
36  
37 According to the risk analysis, treatment delivery parameters, adverse events, follow-up  
38  
39 information, data transmission and protection and informed consent documents comprise risk-  
40  
41 bearing trial aspects and will be monitored.

42  
43 Prior to recruitment, each participating centre will receive a site initiation visit, during which  
44  
45 325 the trial protocol (if necessary) and the eCRFs will be reviewed with centre staff and any  
46  
47 necessary training will be provided. During the study, trial monitors will maintain regular  
48  
49 contact with trial centre staff (by telephone/fax/email/post) to track the progress of the trial,  
50  
51 respond to any problems, and provide general assistance and support.

52  
53 330 The first regular monitoring visit at a site will take place after the randomization of the site's  
54  
55 first patient to check protocol compliance and to prevent further systematic errors due to  
56  
57 misunderstandings. Trial site visits will take place on a regular basis. The frequency of  
58  
59 monitoring visits will depend on the trial site's recruitment rate as well as on potential  
60  
61 problems detected during previous on-site visits or by central monitoring.

1  
2  
3 Prior to every scheduled on-site visit, the monitor will receive summaries of the site's patient  
4 data already documented in the database, and if applicable with data indicating possible  
5 335 data already documented in the database, and if applicable with data indicating possible  
6 protocol deviations or inconsistencies. During the visits, the monitor will a) check informed  
7 consent forms of all patients enrolled, b) perform source data verification of key data in a  
8 random sample of at least 20% of the site's patients, c) perform targeted source data  
9 verification for patients with possible deviations, d) discuss open queries raised by data  
10 management or drug safety personnel, e) check essential parts of the investigator site file, f)  
11 340 check source data for AEs or SAEs, which have not been properly reported in the CRF/eCRF  
12 and g) check for major GCP-breaches and/or protocol violations.  
13  
14  
15  
16  
17  
18

### 19 **Harms**

20  
21 Safety endpoints related directly to MIS<sup>2</sup>ACE include kidney failure, respiratory failure and  
22 embolic events (also from debris). These endpoints will be listed according to treatment  
23 345 received with a breakdown according to the number of MIS<sup>2</sup>ACE sessions. In addition, data  
24 on radiation exposure will be collected and presented descriptively.  
25  
26  
27  
28

### 29 **Patient and Public Involvement**

30  
31 The trial protocol was developed in part by physicians with years of experience in treating  
32 TAAA patients. Their experience indicated that paraplegia is the greatest concern that patients  
33 350 have when deliberating on whether or not to be treated, and was thus chosen along with  
34 mortality for the primary outcome. A qualitative study will recruit about 30 patients after  
35 surgical wound healing for one-on-one in-depth interviews in different sites of the trial.  
36 Purposive sampling will be used to select information-rich cases to be interviewed, according  
37 to criteria of clinical outcome, age, gender and other patient social variables as social class or  
38 ethnicity. The finalization of the data collection process will be determined following the  
39 principle of theoretical saturation. Interviews will take place with an experienced qualitative  
40 researcher in the patient's own language in a mutually convenient, private comfortable place.  
41 A literature review will be conducted to broadly inform the interview guide, though patients  
42 355 will be encouraged to speak freely. The goal is for the patient to express in his or her own words  
43 the impact on their life of diagnosis and treatment, and look at changes that occur in quality of  
44 life, family, work, lifestyle and social environment from an ethnographic standpoint. The  
45 interviews will be recorded and transcribed literally. Summative content analysis will be  
46 performed using NVivo<sup>TM</sup> software (QSR International, Melbourne, Australia). Patients and  
47 the public have not yet been involved directly in the trial.  
48  
49  
50  
51 360  
52  
53  
54  
55  
56  
57  
58  
59  
60

## ETHICS AND DISSEMINATION

### Approval and registration

The trial protocol and the informed consent form have been reviewed and approved by the lead Ethics Committee from the University of Leipzig (435/17-ek) and will be reviewed by each of the Ethics Committees at the trial sites. The Federal Office for Radiation Protection in Germany has also approved the additional radiation use in the intervention group (Z5-22462/2 – 2017-073). The trial has been registered with clinicaltrials.gov (NCT03434314).

Amendments to the protocol will be reviewed by Ethics Committees. Informed consent will be obtained before collecting any patient data and patient information.

### External boards

A Data Monitoring Committee (DMC) has been established to oversee patient safety and data quality in the trial. It consists of three members with expertise in aortic surgery, neurology and medical statistics. The DMC charter states that its role is to “safeguard the interests of trial participants, assess the safety and efficacy of the interventions during the trial, and assist and advise the trial steering committee to protect the validity and credibility of the trial. In order to do this, the DMC evaluates the results of the regular reports and their influence on the risk assessment for the patients as well as for the integrity of the trial. The DMC gives its recommendations at regular intervals as to whether the continuation of the trial is justifiable.”

Only the trial statistician and the DMC members will have access to the interim analyses until the end of the trial. At the inaugural meeting the members of the DMC will be asked to discuss whether SAEs related to the MIS<sup>2</sup>ACE procedure should be sent to them without delay.

An expert advisory board consisting of four international experts on TAAA repair provide the active trial members with independent advice regarding trial design and conduct. It meets with leading members of the consortium on an annual basis and is kept abreast of the trial’s progress.

### Dissemination

One project partner (MODUS Research and Innovation, Edinburgh, Scotland) has a project dedicated to communication and dissemination. Key channels, tools and target audiences for dissemination and use of project results will be identified in a Communication and Dissemination Plan. The dissemination activities will be two-fold: basic communication about

1  
2  
3 the project to the public and specific dissemination to four target communities. One objective  
4 of the dissemination plan will be to support the project partners with the clinical recruitment.  
5  
6 The other objective will be to reach out to wide audiences outside the project consortium at  
7  
8 400 national, European and international levels (medical and health professionals, academics,  
9  
10 medical and biomedical industries, policy makers, EU regulators (e.g. the European  
11  
12 Medicines Agency), patients groups, health NGOs, civil societies, scientific and lay media.  
13  
14 The dissemination vehicles will be seminars, medical conferences and publications, project  
15  
16 partners' individual communication streams. Dissemination material may include a project  
17 405 leaflet, newsletter, press releases and a trial website.  
18  
19  
20  
21  
22  
23  
24  
25  
26  
27  
28  
29  
30  
31  
32  
33  
34  
35  
36  
37  
38  
39  
40  
41  
42  
43  
44  
45  
46  
47  
48  
49  
50  
51  
52  
53  
54  
55  
56  
57  
58  
59  
60

## REFERENCES

- 1 Chan A-W, Tetzlaff JM, Altman DG, et al. SPIRIT 2013 statement: Defining standard protocol items for clinical trials. *Ann Intern Med* 2013;158(3):200–07.
- 2 Chan A-W, Tetzlaff JM, Gøtzsche PC, et al. SPIRIT 2013 explanation and elaboration: Guidance for protocols of clinical trials. *BMJ* 2013;346:e7586.
- 3 Elefteriades JA. Natural history of thoracic aortic aneurysms: Indications for surgery, and surgical versus nonsurgical risks. *Ann Thorac Surg* 2002;74(5):S1877-S1880.
- 4 Crawford ES, Crawford JL, Safi HJ, et al. Thoracoabdominal aortic aneurysms: preoperative and intraoperative factors determining immediate and long-term results of operations in 605 patients. *J Vasc Surg* 1986;3(3):389–404.
- 5 Elefteriades JA. Thoracic aortic aneurysm: reading the enemy's playbook. *Curr Probl Cardiol* 2008;33(5):203–77.
- 6 Frederick JR, Woo YJ. Thoracoabdominal aortic aneurysm. *Ann Cardiothorac Surg* 2012;1(3):277–85.
- 7 Miller C3, Porat EE, Estrera AL, et al. Number needed to treat: analyzing of the effectiveness of thoracoabdominal aortic repair. *Eur J Vasc Endovasc Surg* 2004;28(2):154–57.
- 8 Greenberg RK, Lu Q, Roselli EE, et al. Contemporary analysis of descending thoracic and thoracoabdominal aneurysm repair: a comparison of endovascular and open techniques. *Circulation* 2008;118(8):808–17.
- 9 Etz CD, Weigang E, Hartert M, et al. Contemporary spinal cord protection during thoracic and thoracoabdominal aortic surgery and endovascular aortic repair: a position paper of the vascular domain of the European Association for Cardio-Thoracic Surgery. *Eur J Cardiothorac Surg* 2015;47(6):943–57.
- 10 Conrad MF, Crawford RS, Davison JK, et al. Thoracoabdominal Aneurysm Repair: A 20-Year Perspective. *Ann Thorac Surg* 2007;83(2):S856-S861.
- 11 Etz CD, Luehr M, Kari FA, et al. Spinal cord perfusion after extensive segmental artery sacrifice: can paraplegia be prevented? *Eur J Cardiothorac Surg* 2007;31(4):643–48.
- 12 Etz CD, Kari FA, Mueller CS, et al. The collateral network concept: remodeling of the arterial collateral network after experimental segmental artery sacrifice. *J Thorac Cardiovasc Surg* 2011;141(4):1029–36.
- 13 Zoli S, Etz CD, Roder F, et al. Experimental two-stage simulated repair of extensive thoracoabdominal aneurysms reduces paraplegia risk. *Ann Thorac Surg* 2010;90(3):722–29.

- 1  
2  
3 440 14 Luehr M, Salameh A, Haunschild J, et al. Minimally invasive segmental artery coil  
4 embolization for preconditioning of the spinal cord collateral network before one-stage  
5 descending and thoracoabdominal aneurysm repair. *Innovations (Phila)* 2014;9(1):60–  
6 65.  
7  
8  
9  
10 15 Geisbusch S, Stefanovic A, Koruth JS, et al. Endovascular coil embolization of  
11 segmental arteries prevents paraplegia after subsequent thoracoabdominal aneurysm  
12 445 repair: an experimental model. *J Thorac Cardiovasc Surg* 2014;147(1):220–26.  
13  
14  
15 16 Etz CD, Kari FA, Mueller CS, et al. The collateral network concept: A reassessment of  
16 the anatomy of spinal cord perfusion. *J Thorac Cardiovasc Surg* 2011;141(4):1020–28.  
17  
18 17 Etz CD, Halstead JC, Spielvogel D, et al. Thoracic and thoracoabdominal aneurysm  
19 repair: is reimplantation of spinal cord arteries a waste of time? *Ann Thorac Surg*  
20 450 2006;82(5):1670–77.  
21  
22  
23 18 Etz CD, Homann TM, Luehr M, et al. Spinal cord blood flow and ischemic injury after  
24 experimental sacrifice of thoracic and abdominal segmental arteries. *Eur J Cardiothorac*  
25 *Surg* 2008;33(6):1030–38.  
26  
27 455 19 Etz CD, Luehr M, Kari FA, et al. Paraplegia after extensive thoracic and  
28 thoracoabdominal aortic aneurysm repair: does critical spinal cord ischemia occur  
29 postoperatively? *J Thorac Cardiovasc Surg* 2008;135(2):324–30.  
30  
31  
32 20 Etz CD, Debus ES, Mohr F-W, et al. First-in-man endovascular preconditioning of the  
33 paraspinous collateral network by segmental artery coil embolization to prevent ischemic  
34 spinal cord injury. *J Thorac Cardiovasc Surg* 2015;149(4):1074–79.  
35 460  
36  
37 21 Branzan D, Etz CD, Moche M, et al. Ischaemic preconditioning of the spinal cord to  
38 prevent spinal cord ischaemia during endovascular repair of thoracoabdominal aortic  
39 aneurysm: First clinical experience. *EuroIntervention* 2018;14(7):828–35.  
40  
41 22 Chiesa R, Melissano G, Marrocco-Trischitta MM, et al. Spinal cord ischemia after  
42 elective stent-graft repair of the thoracic aorta. *J Vasc Surg* 2005;42(1):11–17.  
43 465  
44  
45 23 Grabenwöger M, Alfonso F, Bachet J, et al. Thoracic Endovascular Aortic Repair  
46 (TEVAR) for the treatment of aortic diseases: A position statement from the European  
47 Association for Cardio-Thoracic Surgery (EACTS) and the European Society of  
48 Cardiology (ESC), in collaboration with the European Association of Percutaneous  
49 Cardiovascular Interventions (EAPCI). *Eur J Cardiothorac Surg* 2012;42(1):17–24.  
50 470  
51  
52 24 THE WHOQOL GROUP. Development of the World Health Organization WHOQOL-  
53 BREF Quality of Life Assessment. *Psychological Medicine* 1998;28(3):551–58.  
54  
55  
56  
57  
58  
59  
60



- 1  
2  
3 25 Janssen MF, Pickard AS, Golicki D, et al. Measurement properties of the EQ-5D-5L  
4 compared to the EQ-5D-3L across eight patient groups: A multi-country study. *Qual*  
5 *Life Res* 2013;22(7):1717–27.  
6 475  
7 [https://www.ncbi.nlm.nih.gov/pmc/articles/PMC3764313/pdf/11136\\_2012\\_Article\\_322.](https://www.ncbi.nlm.nih.gov/pmc/articles/PMC3764313/pdf/11136_2012_Article_322.pdf)  
8 pdf.  
9  
10  
11 26 Ramsey SD, Willke RJ, Glick H, et al. Cost-effectiveness analysis alongside clinical  
12 trials II-An ISPOR Good Research Practices Task Force report. *Value Health*  
13 480 2015;18(2):161–72.  
14  
15 27 Billings FT, Shaw AD. Clinical trial endpoints in acute kidney injury. *Nephron Clin*  
16 *Pract* 2014;127(1-4):89–93.  
17  
18 28 Fehrenbacher JW, Siderys H, Terry C, et al. Early and late results of descending thoracic  
19 and thoracoabdominal aortic aneurysm open repair with deep hypothermia and  
20 circulatory arrest. *J Thorac Cardiovasc Surg* 2010;140(6, Supplement):S154-S160.  
21 485  
22 29 Zoli S, Roder F, Etz CD, et al. Predicting the Risk of Paraplegia After Thoracic and  
23 Thoracoabdominal Aneurysm Repair. *Ann Thorac Surg* 2010;90(4):1237–45.  
24  
25 30 Coselli JS, LeMaire SA, Preventza O, et al. Outcomes of 3309 thoracoabdominal aortic  
26 aneurysm repairs. *J Thorac Cardiovasc Surg* 2016;151(5):1323–37.  
27  
28 490 31 Katsargyris A, Oikonomou K, Kouvelos G, et al. Spinal cord ischemia after  
29 endovascular repair of thoracoabdominal aortic aneurysms with fenestrated and  
30 branched stent grafts. *J Vasc Surg* 2015;62(6):1450–56.  
31  
32 32 Bisdas T, Panuccio G, Sugimoto M, et al. Risk factors for spinal cord ischemia after  
33 endovascular repair of thoracoabdominal aortic aneurysms. *J Vasc Surg*  
34 495 2015;61(6):1408–16.  
35  
36 33 Dias NV, Sonesson B, Kristmundsson T, et al. Short-term outcome of spinal cord  
37 ischemia after endovascular repair of thoracoabdominal aortic aneurysms. *European*  
38 *Journal of Vascular and Endovascular Surgery* 2015;49(4):403–09.  
39  
40 34 Riley RD, Higgins JPT, Deeks JJ. Interpretation of random effects meta-analyses. *BMJ*  
41 500 2011;342:d549.  
42  
43 35 O'Brien PC, Fleming TR. A multiple testing procedure for clinical trials. *Biometrics*  
44 1979;35(3):549–56.  
45  
46 36 Hintze J. PASS. NCSS, LLC. Kaysville, Utah, USA.: PASS 11 2011.  
47  
48 37 Aitkin M. The Analysis of Unbalanced Cross-Classifications. *Journal of the Royal*  
49 *Statistical Society. Series A (General)* 1978;141(2):195.  
50 505  
51  
52  
53  
54  
55  
56  
57  
58  
59  
60



- 1  
2  
3 38 Nelder JA. A Reformulation of Linear Models. *Journal of the Royal Statistical Society.*  
4 *Series A (General)* 1977;140(1):48.  
5  
6 39 Stenberg K, Lauer JA, Gkountouras G, et al. Econometric estimation of WHO-CHOICE  
7 country-specific costs for inpatient and outpatient health service delivery. *Cost Eff*  
8 *Resour Alloc* 2018;16:11.  
9  
10 510 40 Ludwig K, Graf von der Schulenburg J-M, Greiner W. German Value Set for the EQ-  
11 5D-5L. *Pharmacoeconomics* 2018;36(6):663–74.  
12  
13  
14  
15  
16  
17  
18  
19  
20  
21  
22  
23  
24  
25  
26  
27  
28  
29  
30  
31  
32  
33  
34  
35  
36  
37  
38  
39  
40  
41  
42  
43  
44  
45  
46  
47  
48  
49  
50  
51  
52  
53  
54  
55  
56  
57  
58  
59  
60

For peer review only

### Authors' contributions

515 DP: study conception and design, statistical methods and sample size calculations, writing and  
reviewing of the manuscript. MC, TK, GM, KvA, JH: study design with particular focus on  
cardiovascular endpoints, reviewing of the manuscript. LL: study design with particular focus  
on radiological methods, reviewing of the manuscript. PN, KP: study design, ethics, data  
management, writing and reviewing of the manuscript. JP: study design with particular focus  
520 on neurological methods and endpoints, reviewing of the manuscript. DE: study design with  
particular focus on health economics and patient satisfaction, reviewing of the manuscript.  
NR: study design for portion on qualitative patient satisfaction, reviewing of the manuscript.  
CDE: research that lay foundation for trial, initial study conception, study design, writing and  
reviewing of the manuscript. All authors have read and approved the final manuscript.

### 525 Funding statement

This project has received funding from the European Union's Horizon 2020 research and  
innovation programme under grant agreement 733203 and from the German Research  
Foundation under grant number ET 127/2-1.

### Competing interests statement

530 The authors have no competing interests related to this trial.

### License statement

I, the Submitting Author has the right to grant and does grant on behalf of all authors of the  
Work (as defined in the below author licence), an exclusive licence and/or a non-exclusive  
licence for contributions from authors who are: i) UK Crown employees; ii) where BMJ has  
535 agreed a CC-BY licence shall apply, and/or iii) in accordance with the terms applicable for  
US Federal Government officers or employees acting as part of their official duties; on a  
worldwide, perpetual, irrevocable, royalty-free basis to BMJ Publishing Group Ltd ("BMJ")  
its licensees and where the relevant Journal is co-owned by BMJ to the co-owners of the  
Journal, to publish the Work in BMJ Open and any other BMJ products and to exploit all  
540 rights, as set out in our licence.

The Submitting Author accepts and understands that any supply made under these terms is  
made by BMJ to the Submitting Author unless you are acting as an employee on behalf of  
your employer or a postgraduate student of an affiliated institution which is paying any  
applicable article publishing charge ("APC") for Open Access articles. Where the Submitting

1  
2  
3 545 Author wishes to make the Work available on an Open Access basis (and intends to pay the  
4 relevant APC), the terms of reuse of such Open Access shall be governed by a Creative  
5 Commons licence – details of these licences and which Creative Commons licence will apply  
6 to this Work are set out in our licence referred to above.  
7  
8  
9

10  
11  
12  
13 550 **Figure Legends**

14  
15  
16 **Figure 1:** Schematic portrayal of the participant timeline and visit schedule for the PAPAartis  
17 trial.  
18  
19  
20  
21  
22  
23  
24  
25  
26  
27  
28  
29  
30  
31  
32  
33  
34  
35  
36  
37  
38  
39  
40  
41  
42  
43  
44  
45  
46  
47  
48  
49  
50  
51  
52  
53  
54  
55  
56  
57  
58  
59  
60

max. 6 months

BMJ Open

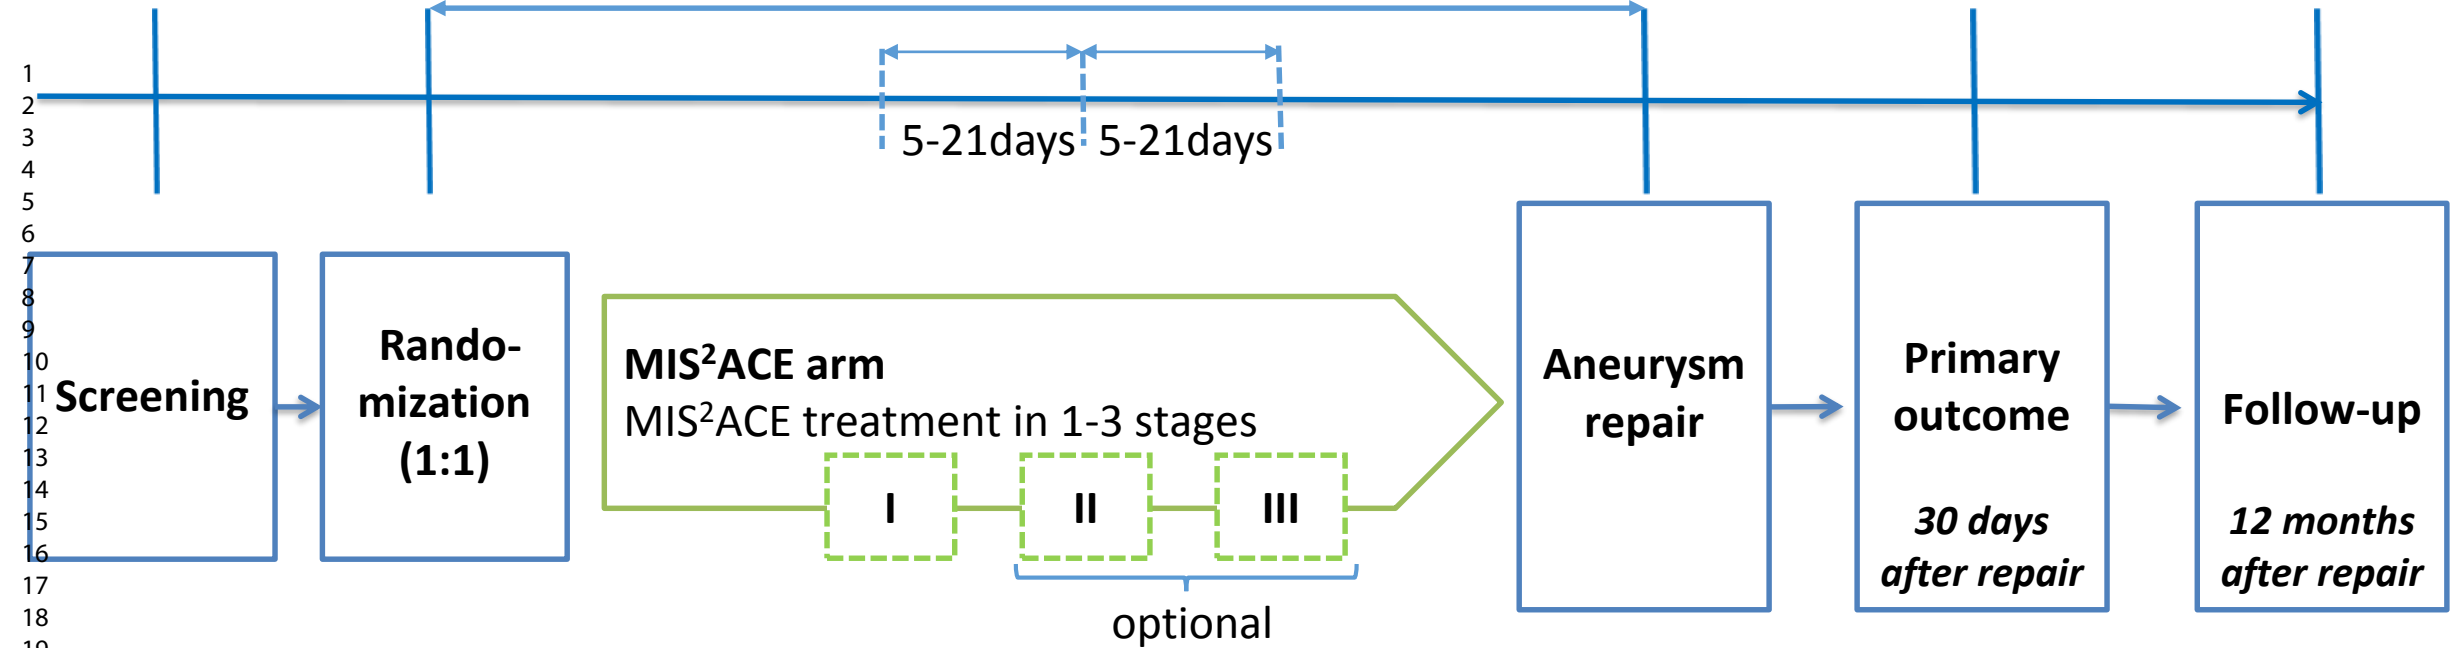

max. 6 months

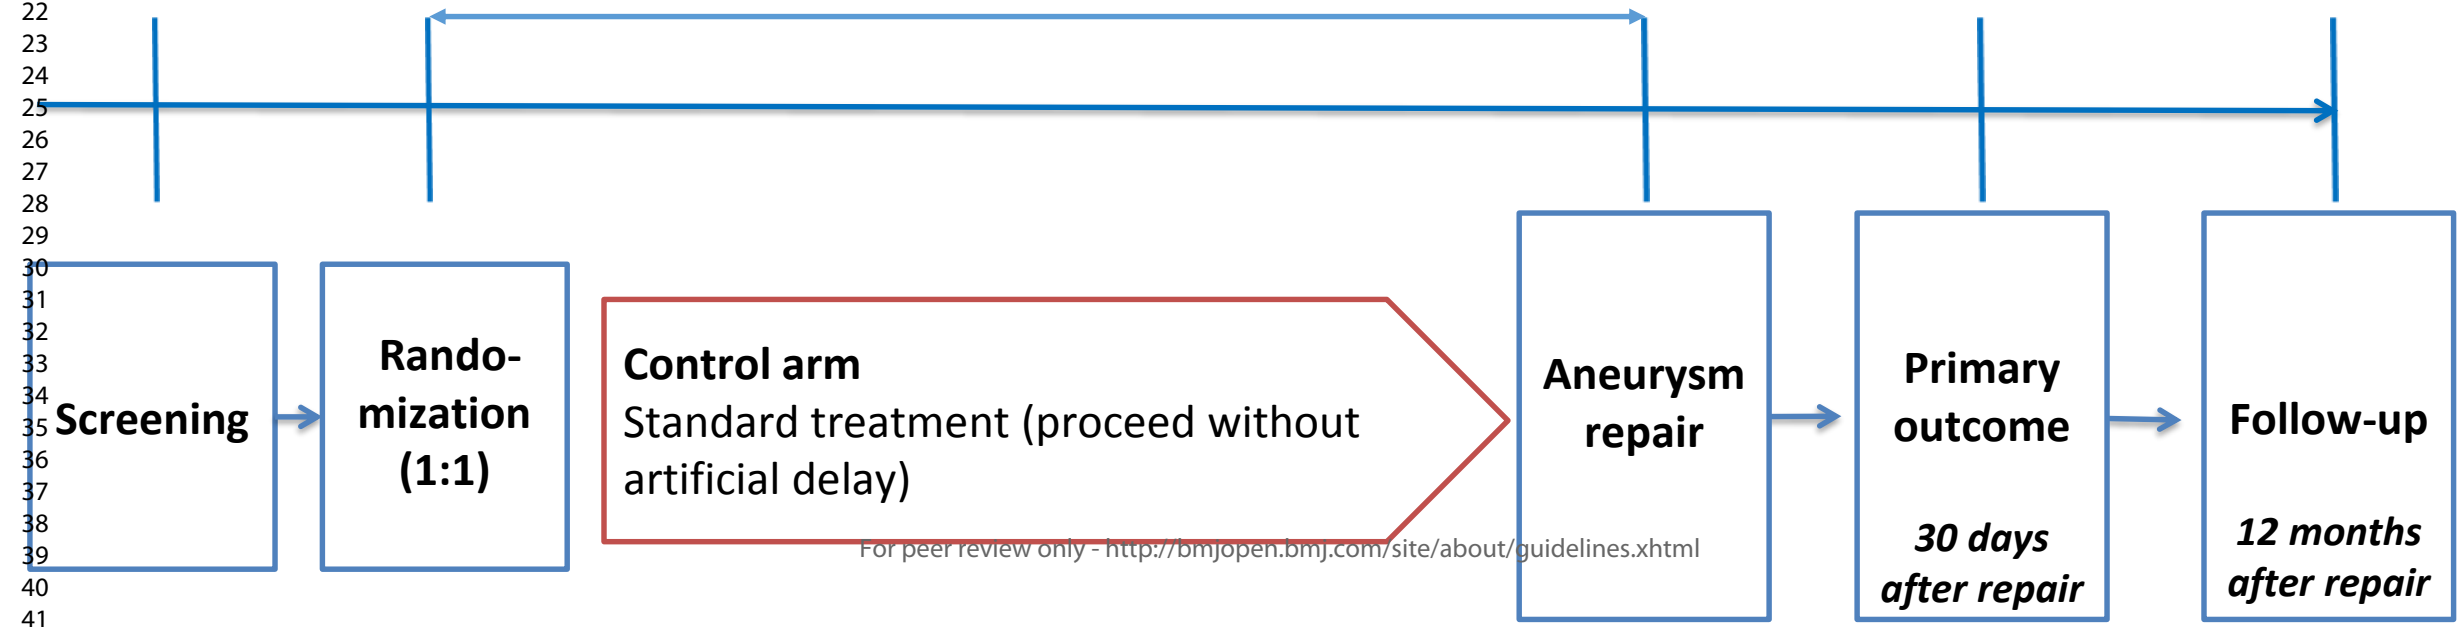

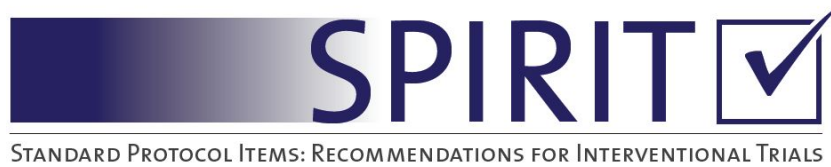

SPIRIT 2013 Checklist: Recommended items to address in a clinical trial protocol and related documents\*

| Section/item                      | Item No | Description                                                                                                                                                                                                                                                                                                           |
|-----------------------------------|---------|-----------------------------------------------------------------------------------------------------------------------------------------------------------------------------------------------------------------------------------------------------------------------------------------------------------------------|
| <b>Administrative information</b> |         |                                                                                                                                                                                                                                                                                                                       |
| Title                             | 1       | Descriptive title identifying the study design, population, interventions, and, if applicable, trial acronym<br><br><i>Title page</i>                                                                                                                                                                                 |
| Trial registration                | 2a      | Trial identifier and registry name. If not yet registered, name of intended registry<br><br><i>End of Abstract</i>                                                                                                                                                                                                    |
|                                   | 2b      | All items from the World Health Organization Trial Registration Data Set<br><br><i>Available through the <a href="http://clinicaltrials.gov">clinicaltrials.gov</a> website and in the full trial protocol</i>                                                                                                        |
| Protocol version                  | 3       | Date and version identifier<br><br><i>Not applicable</i>                                                                                                                                                                                                                                                              |
| Funding                           | 4       | Sources and types of financial, material, and other support<br><br><i>Lines 508-510</i>                                                                                                                                                                                                                               |
| Roles and responsibilities        | 5a      | Names, affiliations, and roles of protocol contributors<br><br><i>Lines 496-506</i>                                                                                                                                                                                                                                   |
|                                   | 5b      | Name and contact information for the trial sponsor<br><br><i>Not applicable (there is no legal "sponsor" function, but the coordinating investigator was named)</i>                                                                                                                                                   |
|                                   | 5c      | Role of study sponsor and funders, if any, in study design; collection, management, analysis, and interpretation of data; writing of the report; and the decision to submit the report for publication, including whether they will have ultimate authority over any of these activities<br><br><i>Not applicable</i> |

- 1  
2  
3  
4  
5  
6  
7  
8  
9
- 5d Composition, roles, and responsibilities of the coordinating centre, steering committee, endpoint adjudication committee, data management team, and other individuals or groups overseeing the trial, if applicable (see Item 21a for data monitoring committee)

*Described throughout paper*

10  
11

## Introduction

- 12  
13  
14  
15  
16
- Background and rationale 6a Description of research question and justification for undertaking the trial, including summary of relevant studies (published and unpublished) examining benefits and harms for each intervention

17  
18

*Line 32-44*

- 19  
20  
21
- 6b Explanation for choice of comparators

22  
23

*Lines 116-119*

- 24  
25
- Objectives 7 Specific objectives or hypotheses

26  
27

*Lines 45-47*

- 28  
29  
30  
31  
32
- Trial design 8 Description of trial design including type of trial (eg, parallel group, crossover, factorial, single group), allocation ratio, and framework (eg, superiority, equivalence, noninferiority, exploratory)

33  
34

*Lines 49-51*

35  
36

## Methods: Participants, interventions, and outcomes

- 37  
38  
39  
40  
41
- Study setting 9 Description of study settings (eg, community clinic, academic hospital) and list of countries where data will be collected. Reference to where list of study sites can be obtained

42  
43

*Lines 54-64*

- 44  
45  
46  
47  
48
- Eligibility criteria 10 Inclusion and exclusion criteria for participants. If applicable, eligibility criteria for study centres and individuals who will perform the interventions (eg, surgeons, psychotherapists)

49  
50

*Lines 66-89*

- 51  
52  
53  
54
- Interventions 11a Interventions for each group with sufficient detail to allow replication, including how and when they will be administered

55  
56  
57  
58  
59  
60

*Lines 91-118*

|    |             |     |                                                                       |
|----|-------------|-----|-----------------------------------------------------------------------|
| 1  |             |     |                                                                       |
| 2  |             | 11b | Criteria for discontinuing or modifying allocated interventions for a |
| 3  |             |     | given trial participant (eg, drug dose change in response to harms,   |
| 4  |             |     | participant request, or improving/worsening disease)                  |
| 5  |             |     |                                                                       |
| 6  |             |     | <i>Lines 119-121</i>                                                  |
| 7  |             |     |                                                                       |
| 8  |             | 11c | Strategies to improve adherence to intervention protocols, and any    |
| 9  |             |     | procedures for monitoring adherence (eg, drug tablet return,          |
| 10 |             |     | laboratory tests)                                                     |
| 11 |             |     |                                                                       |
| 12 |             |     | <i>Lines 309-317</i>                                                  |
| 13 |             |     |                                                                       |
| 14 |             | 11d | Relevant concomitant care and interventions that are permitted or     |
| 15 |             |     | prohibited during the trial                                           |
| 16 |             |     |                                                                       |
| 17 |             |     | <i>Not applicable</i>                                                 |
| 18 |             |     |                                                                       |
| 19 |             |     |                                                                       |
| 20 |             |     |                                                                       |
| 21 | Outcomes    | 12  | Primary, secondary, and other outcomes, including the specific        |
| 22 |             |     | measurement variable (eg, systolic blood pressure), analysis metric   |
| 23 |             |     | (eg, change from baseline, final value, time to event), method of     |
| 24 |             |     | aggregation (eg, median, proportion), and time point for each         |
| 25 |             |     | outcome. Explanation of the clinical relevance of chosen efficacy and |
| 26 |             |     | harm outcomes is strongly recommended                                 |
| 27 |             |     |                                                                       |
| 28 |             |     | <i>Lines 124-176</i>                                                  |
| 29 |             |     |                                                                       |
| 30 |             |     |                                                                       |
| 31 |             |     |                                                                       |
| 32 | Participant | 13  | Time schedule of enrolment, interventions (including any run-ins and  |
| 33 | timeline    |     | washouts), assessments, and visits for participants. A schematic      |
| 34 |             |     | diagram is highly recommended (see Figure)                            |
| 35 |             |     |                                                                       |
| 36 |             |     | <i>Figure 1</i>                                                       |
| 37 |             |     |                                                                       |
| 38 |             |     |                                                                       |
| 39 | Sample size | 14  | Estimated number of participants needed to achieve study objectives   |
| 40 |             |     | and how it was determined, including clinical and statistical         |
| 41 |             |     | assumptions supporting any sample size calculations                   |
| 42 |             |     |                                                                       |
| 43 |             |     | <i>Lines 184-198</i>                                                  |
| 44 |             |     |                                                                       |
| 45 |             |     |                                                                       |
| 46 | Recruitment | 15  | Strategies for achieving adequate participant enrolment to reach      |
| 47 |             |     | target sample size                                                    |
| 48 |             |     |                                                                       |
| 49 |             |     | <i>Lines 199-207</i>                                                  |
| 50 |             |     |                                                                       |

## Methods: Assignment of interventions (for controlled trials)

### Allocation:

|    |                                                           |     |                                                                             |
|----|-----------------------------------------------------------|-----|-----------------------------------------------------------------------------|
| 1  |                                                           |     |                                                                             |
| 2  | Sequence                                                  | 16a | Method of generating the allocation sequence (eg, computer-                 |
| 3  | generation                                                |     | generated random numbers), and list of any factors for stratification.      |
| 4  |                                                           |     | To reduce predictability of a random sequence, details of any planned       |
| 5  |                                                           |     | restriction (eg, blocking) should be provided in a separate document        |
| 6  |                                                           |     | that is unavailable to those who enrol participants or assign               |
| 7  |                                                           |     | interventions                                                               |
| 8  |                                                           |     |                                                                             |
| 9  |                                                           |     |                                                                             |
| 10 |                                                           |     | <i>Lines 209-211</i>                                                        |
| 11 |                                                           |     |                                                                             |
| 12 | Allocation                                                | 16b | Mechanism of implementing the allocation sequence (eg, central              |
| 13 | concealment                                               |     | telephone; sequentially numbered, opaque, sealed envelopes),                |
| 14 | mechanism                                                 |     | describing any steps to conceal the sequence until interventions are        |
| 15 |                                                           |     | assigned                                                                    |
| 16 |                                                           |     |                                                                             |
| 17 |                                                           |     |                                                                             |
| 18 |                                                           |     | <i>Lines 213-214</i>                                                        |
| 19 |                                                           |     |                                                                             |
| 20 | Implementation                                            | 16c | Who will generate the allocation sequence, who will enrol participants,     |
| 21 |                                                           |     | and who will assign participants to interventions                           |
| 22 |                                                           |     |                                                                             |
| 23 |                                                           |     |                                                                             |
| 24 |                                                           |     | <i>Line 211</i>                                                             |
| 25 |                                                           |     |                                                                             |
| 26 | Blinding                                                  | 17a | Who will be blinded after assignment to interventions (eg, trial            |
| 27 | (masking)                                                 |     | participants, care providers, outcome assessors, data analysts), and        |
| 28 |                                                           |     | how                                                                         |
| 29 |                                                           |     |                                                                             |
| 30 |                                                           |     |                                                                             |
| 31 |                                                           |     | <i>Not applicable (discussed as limitation)</i>                             |
| 32 |                                                           |     |                                                                             |
| 33 |                                                           | 17b | If blinded, circumstances under which unblinding is permissible, and        |
| 34 |                                                           |     | procedure for revealing a participant's allocated intervention during       |
| 35 |                                                           |     | the trial                                                                   |
| 36 |                                                           |     |                                                                             |
| 37 |                                                           |     |                                                                             |
| 38 |                                                           |     | <i>Not applicable</i>                                                       |
| 39 |                                                           |     |                                                                             |
| 40 | <b>Methods: Data collection, management, and analysis</b> |     |                                                                             |
| 41 |                                                           |     |                                                                             |
| 42 | Data collection                                           | 18a | Plans for assessment and collection of outcome, baseline, and other         |
| 43 | methods                                                   |     | trial data, including any related processes to promote data quality (eg,    |
| 44 |                                                           |     | duplicate measurements, training of assessors) and a description of         |
| 45 |                                                           |     | study instruments (eg, questionnaires, laboratory tests) along with         |
| 46 |                                                           |     | their reliability and validity, if known. Reference to where data           |
| 47 |                                                           |     | collection forms can be found, if not in the protocol                       |
| 48 |                                                           |     |                                                                             |
| 49 |                                                           |     |                                                                             |
| 50 |                                                           |     |                                                                             |
| 51 |                                                           |     | <i>Lines 142, 219-227</i>                                                   |
| 52 |                                                           |     |                                                                             |
| 53 |                                                           | 18b | Plans to promote participant retention and complete follow-up,              |
| 54 |                                                           |     | including list of any outcome data to be collected for participants who     |
| 55 |                                                           |     | discontinue or deviate from intervention protocols                          |
| 56 |                                                           |     |                                                                             |
| 57 |                                                           |     |                                                                             |
| 58 |                                                           |     | <i>Not applicable (since intervention always well documented and short-</i> |
| 59 |                                                           |     | <i>term and mortality data are expected to be very complete)</i>            |
| 60 |                                                           |     |                                                                             |



- 1  
2  
3  
4  
5  
6  
7  
8  
9  
10  
11  
12  
13  
14  
15  
16  
17  
18  
19  
20  
21  
22  
23  
24  
25  
26  
27  
28  
29  
30  
31  
32  
33  
34  
35  
36  
37  
38  
39  
40  
41  
42  
43  
44  
45  
46  
47  
48  
49  
50  
51  
52  
53  
54  
55  
56  
57  
58  
59  
60
- Data management 19 Plans for data entry, coding, security, and storage, including any related processes to promote data quality (eg, double data entry; range checks for data values). Reference to where details of data management procedures can be found, if not in the protocol
- Lines 229-244*
- Statistical methods 20a Statistical methods for analysing primary and secondary outcomes. Reference to where other details of the statistical analysis plan can be found, if not in the protocol
- Lines 263-276*
- 20b Methods for any additional analyses (eg, subgroup and adjusted analyses)
- Lines 282-305*
- 20c Definition of analysis population relating to protocol non-adherence (eg, as randomised analysis), and any statistical methods to handle missing data (eg, multiple imputation)
- Lines 247-261*
- Methods: Monitoring**
- Data monitoring 21a Composition of data monitoring committee (DMC); summary of its role and reporting structure; statement of whether it is independent from the sponsor and competing interests; and reference to where further details about its charter can be found, if not in the protocol. Alternatively, an explanation of why a DMC is not needed
- Lines 365-376*
- 21b Description of any interim analyses and stopping guidelines, including who will have access to these interim results and make the final decision to terminate the trial
- Lines 194, 277-281, 371-372*
- Harms 22 Plans for collecting, assessing, reporting, and managing solicited and spontaneously reported adverse events and other unintended effects of trial interventions or trial conduct
- Lines 172-179, 342-345*

|    |                                 |     |                                                                                  |
|----|---------------------------------|-----|----------------------------------------------------------------------------------|
| 1  |                                 |     |                                                                                  |
| 2  | Auditing                        | 23  | Frequency and procedures for auditing trial conduct, if any, and                 |
| 3  |                                 |     | whether the process will be independent from investigators and the               |
| 4  |                                 |     | sponsor                                                                          |
| 5  |                                 |     |                                                                                  |
| 6  |                                 |     |                                                                                  |
| 7  |                                 |     | <i>Lines 318-340, 365-380</i>                                                    |
| 8  |                                 |     |                                                                                  |
| 9  | <b>Ethics and dissemination</b> |     |                                                                                  |
| 10 |                                 |     |                                                                                  |
| 11 | Research ethics approval        | 24  | Plans for seeking research ethics committee/institutional review board           |
| 12 |                                 |     | (REC/IRB) approval                                                               |
| 13 |                                 |     |                                                                                  |
| 14 |                                 |     |                                                                                  |
| 15 |                                 |     | <i>Lines 357-361</i>                                                             |
| 16 |                                 |     |                                                                                  |
| 17 | Protocol amendments             | 25  | Plans for communicating important protocol modifications (eg,                    |
| 18 |                                 |     | changes to eligibility criteria, outcomes, analyses) to relevant parties         |
| 19 |                                 |     | (eg, investigators, REC/IRBs, trial participants, trial registries, journals,    |
| 20 |                                 |     | regulators)                                                                      |
| 21 |                                 |     |                                                                                  |
| 22 |                                 |     |                                                                                  |
| 23 |                                 |     | <i>Line 362.</i>                                                                 |
| 24 |                                 |     |                                                                                  |
| 25 | Consent or assent               | 26a | Who will obtain informed consent or assent from potential trial                  |
| 26 |                                 |     | participants or authorised surrogates, and how (see Item 32)                     |
| 27 |                                 |     |                                                                                  |
| 28 |                                 |     |                                                                                  |
| 29 |                                 |     | <i>Not applicable (part of trial protocol and delegation lists, but too</i>      |
| 30 |                                 |     | <i>technical for manuscript)</i>                                                 |
| 31 |                                 |     |                                                                                  |
| 32 |                                 | 26b | Additional consent provisions for collection and use of participant data         |
| 33 |                                 |     | and biological specimens in ancillary studies, if applicable                     |
| 34 |                                 |     |                                                                                  |
| 35 |                                 |     | <i>Not applicable</i>                                                            |
| 36 |                                 |     |                                                                                  |
| 37 | Confidentiality                 | 27  | How personal information about potential and enrolled participants will          |
| 38 |                                 |     | be collected, shared, and maintained in order to protect confidentiality         |
| 39 |                                 |     | before, during, and after the trial                                              |
| 40 |                                 |     |                                                                                  |
| 41 |                                 |     |                                                                                  |
| 42 |                                 |     | <i>Not applicable (part of full protocol, but too technical and detailed for</i> |
| 43 |                                 |     | <i>this manuscript).</i>                                                         |
| 44 |                                 |     |                                                                                  |
| 45 | Declaration of interests        | 28  | Financial and other competing interests for principal investigators for          |
| 46 |                                 |     | the overall trial and each study site                                            |
| 47 |                                 |     |                                                                                  |
| 48 |                                 |     |                                                                                  |
| 49 |                                 |     | <i>Not applicable (site contracts are confidential).</i>                         |
| 50 |                                 |     |                                                                                  |
| 51 | Access to data                  | 29  | Statement of who will have access to the final trial dataset, and                |
| 52 |                                 |     | disclosure of contractual agreements that limit such access for                  |
| 53 |                                 |     | investigators                                                                    |
| 54 |                                 |     |                                                                                  |
| 55 |                                 |     |                                                                                  |
| 56 |                                 |     | <i>Not applicable (not regulated contractually).</i>                             |
| 57 |                                 |     |                                                                                  |
| 58 |                                 |     |                                                                                  |
| 59 |                                 |     |                                                                                  |
| 60 |                                 |     |                                                                                  |

|    |                   |     |                                                                                  |
|----|-------------------|-----|----------------------------------------------------------------------------------|
| 1  |                   |     |                                                                                  |
| 2  | Ancillary and     | 30  | Provisions, if any, for ancillary and post-trial care, and for                   |
| 3  | post-trial care   |     | compensation to those who suffer harm from trial participation                   |
| 4  |                   |     |                                                                                  |
| 5  |                   |     | <i>Not applicable (insurance provided for all patients however).</i>             |
| 6  |                   |     |                                                                                  |
| 7  | Dissemination     | 31a | Plans for investigators and sponsor to communicate trial results to              |
| 8  | policy            |     | participants, healthcare professionals, the public, and other relevant           |
| 9  |                   |     | groups (eg, via publication, reporting in results databases, or other            |
| 10 |                   |     | data sharing arrangements), including any publication restrictions               |
| 11 |                   |     |                                                                                  |
| 12 |                   |     | <i>Lines 382-394</i>                                                             |
| 13 |                   |     |                                                                                  |
| 14 |                   |     |                                                                                  |
| 15 |                   | 31b | Authorship eligibility guidelines and any intended use of professional           |
| 16 |                   |     | writers                                                                          |
| 17 |                   |     |                                                                                  |
| 18 |                   |     | <i>Not applicable (will be decided within consortium at later date).</i>         |
| 19 |                   |     |                                                                                  |
| 20 |                   |     |                                                                                  |
| 21 |                   | 31c | Plans, if any, for granting public access to the full protocol, participant-     |
| 22 |                   |     | level dataset, and statistical code                                              |
| 23 |                   |     |                                                                                  |
| 24 |                   |     | <i>Not applicable (will be decided within consortium at later date).</i>         |
| 25 |                   |     |                                                                                  |
| 26 |                   |     |                                                                                  |
| 27 | <b>Appendices</b> |     |                                                                                  |
| 28 |                   |     |                                                                                  |
| 29 | Informed consent  | 32  | Model consent form and other related documentation given to                      |
| 30 | materials         |     | participants and authorised surrogates                                           |
| 31 |                   |     |                                                                                  |
| 32 |                   |     | <i>Not applicable (part of full protocol, but too technical and detailed for</i> |
| 33 |                   |     | <i>this manuscript).</i>                                                         |
| 34 |                   |     |                                                                                  |
| 35 |                   |     |                                                                                  |
| 36 | Biological        | 33  | Plans for collection, laboratory evaluation, and storage of biological           |
| 37 | specimens         |     | specimens for genetic or molecular analysis in the current trial and for         |
| 38 |                   |     | future use in ancillary studies, if applicable                                   |
| 39 |                   |     |                                                                                  |
| 40 |                   |     | <i>Not applicable (part of full protocol, but too technical and detailed for</i> |
| 41 |                   |     | <i>this manuscript).</i>                                                         |
| 42 |                   |     |                                                                                  |
| 43 |                   |     |                                                                                  |

---

\*It is strongly recommended that this checklist be read in conjunction with the SPIRIT 2013 Explanation & Elaboration for important clarification on the items. Amendments to the protocol should be tracked and dated. The SPIRIT checklist is copyrighted by the SPIRIT Group under the Creative Commons "[Attribution-NonCommercial-NoDerivs 3.0 Unported](https://creativecommons.org/licenses/by-nc-nd/3.0/)" license.

# BMJ Open

## Paraplegia Prevention in Aortic Aneurysm Repair by Thoracoabdominal Staging with 'Minimally-Invasive Staged Segmental Artery Coil-Embolization' (MIS<sup>2</sup>ACE): Trial protocol for a Randomized Controlled Multicentre Trial

|                                 |                                                                                                                                                                                                                                                                                                                                                                                                                                                                                                                                                                                                                                                                                                                                                                                                                                                                                                                                                                                                                                         |
|---------------------------------|-----------------------------------------------------------------------------------------------------------------------------------------------------------------------------------------------------------------------------------------------------------------------------------------------------------------------------------------------------------------------------------------------------------------------------------------------------------------------------------------------------------------------------------------------------------------------------------------------------------------------------------------------------------------------------------------------------------------------------------------------------------------------------------------------------------------------------------------------------------------------------------------------------------------------------------------------------------------------------------------------------------------------------------------|
| Journal:                        | <i>BMJ Open</i>                                                                                                                                                                                                                                                                                                                                                                                                                                                                                                                                                                                                                                                                                                                                                                                                                                                                                                                                                                                                                         |
| Manuscript ID                   | bmjopen-2018-025488.R3                                                                                                                                                                                                                                                                                                                                                                                                                                                                                                                                                                                                                                                                                                                                                                                                                                                                                                                                                                                                                  |
| Article Type:                   | Protocol                                                                                                                                                                                                                                                                                                                                                                                                                                                                                                                                                                                                                                                                                                                                                                                                                                                                                                                                                                                                                                |
| Date Submitted by the Author:   | 02-Feb-2019                                                                                                                                                                                                                                                                                                                                                                                                                                                                                                                                                                                                                                                                                                                                                                                                                                                                                                                                                                                                                             |
| Complete List of Authors:       | Petroff, David; University of Leipzig, Clinical Trial Centre<br>Czerny, Martin; Universitäts-Herzzentrum Freiburg Bad Krozingen GmbH; Albert-Ludwigs-Universität Freiburg Medizinische Fakultät<br>Kölbl, Tilo; University heart center hamburg, Department of Vascular Medicine<br>Melissano, Germano; Università Vita Salute San Raffaele, Division of Vascular Surgery<br>Lonn, Lars; Rigshospitalet, Department of (Interventional) Radiology<br>Haunschild, Josephina; University Heart Center Leipzig, Department of Cardiac Surgery<br>von Aspern, Konstantin; University Heart Center Leipzig, Department of Cardiac Surgery<br>Neuhaus, Petra; University of Leipzig, Clinical Trial Centre<br>Pelz, Johann; Universitätsklinikum Leipzig, Department of Neurology<br>EPSTEIN, DAVID; Universidad de Granada - Campus de Cartuja, Economía Aplicada<br>Romo-Avilés, Nuria<br>Piotrowski, Katja; University of Leipzig, Clinical Trial Centre<br>Etz, Christian; University Heart Center Leipzig, Department of Cardiac Surgery |
| <b>Primary Subject Heading</b>: | Cardiovascular medicine                                                                                                                                                                                                                                                                                                                                                                                                                                                                                                                                                                                                                                                                                                                                                                                                                                                                                                                                                                                                                 |
| Secondary Subject Heading:      | Neurology                                                                                                                                                                                                                                                                                                                                                                                                                                                                                                                                                                                                                                                                                                                                                                                                                                                                                                                                                                                                                               |
| Keywords:                       | Thoracoabdominal aortic aneurysms, TAAA, spinal cord injury, SCI, segmental artery coil embolization, MISACE                                                                                                                                                                                                                                                                                                                                                                                                                                                                                                                                                                                                                                                                                                                                                                                                                                                                                                                            |
|                                 |                                                                                                                                                                                                                                                                                                                                                                                                                                                                                                                                                                                                                                                                                                                                                                                                                                                                                                                                                                                                                                         |

SCHOLARONE™  
Manuscripts

1  
2  
3 **Paraplegia Prevention in Aortic Aneurysm Repair by Thoracoabdominal**  
4 **Staging with ‘Minimally-Invasive Staged Segmental Artery Coil-**  
5 **Embolization’ (MIS<sup>2</sup>ACE): Trial protocol for a Randomized Controlled**  
6 **Multicentre Trial**  
7  
8  
9  
10

11 David Petroff,<sup>1</sup> Martin Czerny,<sup>2,3</sup> Tilo Kölbel,<sup>4</sup> Germano Melissano,<sup>5</sup> Lars Lonn,<sup>6</sup> Josephina  
12 Haunschild,<sup>7</sup> Konstantin von Aspern,<sup>7</sup> Petra Neuhaus,<sup>1</sup> Johann Pelz,<sup>8</sup> David Epstein,<sup>9</sup> Nuria  
13 Romo-Avilés,<sup>10</sup> Katja Piotrowski,<sup>1</sup> Christian D Etz<sup>7</sup>  
14  
15  
16

17 <sup>1</sup> Clinical Trial Centre, University of Leipzig, Germany

18 <sup>2</sup> University Heart Center Freiburg-Bad Krozingen, Germany

19 <sup>3</sup> Faculty of Medicine, Albert Ludwigs University Freiburg, Germany

20 <sup>4</sup> German Aortic Center Hamburg, Department of Vascular Medicine, University Heart  
21 Center, Hamburg, Germany

22 <sup>5</sup> Division of Vascular Surgery, "Vita-Salute" University, IRCCS San Raffaele Scientific  
23 Institute, Milan, Italy

24 <sup>6</sup> Department of (Interventional) Radiology, Rigshospitalet, National Hospital and University  
25 of Copenhagen, Denmark

26 <sup>7</sup> University Department of Cardiac Surgery, Leipzig Heart Center, Germany

27 <sup>8</sup> Department of Neurology, Leipzig University Hospital, Germany

28 <sup>9</sup> Department of Applied Economics, University of Granada, Spain.

29 <sup>10</sup> Department of Social Anthropology, University of Granada, Spain.  
30  
31  
32  
33  
34  
35  
36  
37  
38  
39  
40  
41  
42  
43

44 **Corresponding author:**

45 David Petroff (for the journal and questions regarding trial design)

46 Clinical Trial Centre, University of Leipzig

47 Haertelstr. 16-18, 04107 Leipzig, Germany

48 +49 341 9716354

49 [David.Petroff@zks.uni-leipzig.de](mailto:David.Petroff@zks.uni-leipzig.de)

50  
51 Christian Etz (for medical questions)

52 [Chrstitian.Etz@medizin.uni-leipzig.de](mailto:Chrstitian.Etz@medizin.uni-leipzig.de)  
53  
54  
55

56 **Word count:** 3956

57  
58 **Keywords:** Thoracoabdominal aortic aneurysms, TAAA, spinal cord injury, SCI, segmental  
59 artery coil embolization, MIS<sup>2</sup>ACE  
60

## ABSTRACT

**Introduction** Spinal cord injury (SCI) including permanent paraplegia constitutes a common complication after repair of thoracoabdominal aortic aneurysms. The staged-repair concept promises to provide protection by inducing arteriogenesis so that the collateral network can provide a robust blood supply to the spinal cord after intervention. Minimally invasive staged segmental artery coil embolization (MIS<sup>2</sup>ACE) has been proved recently to be a feasible enhanced approach to staged repair.

**Methods and analysis** This randomized controlled trial (RCT) uses a multi-centre, multinational, parallel group design, where 500 patients will be randomized in a 1:1 ratio to standard aneurysm repair or to MIS<sup>2</sup>ACE in 1-3 sessions followed by repair. Before randomization, physicians document whether open or endovascular repair is planned. The primary endpoint is successful aneurysm repair without substantial SCI 30 days after aneurysm repair. Secondary endpoints include any form of SCI, mortality (up to one year), length of stay in the intensive care unit (ICU), costs and quality of life adjusted years (QALYs). A generalized linear mixed model will be used with the logit link function and randomization arm, mode of repair (open or endovascular repair), the Crawford type and the euroSCORE II as fixed effects and the centre as a random effect. Safety endpoints include kidney failure, respiratory failure and embolic events (also from debris). A qualitative study will explore patient perceptions.

**Ethics and dissemination** This trial has been approved by the lead Ethics Committee from the University of Leipzig (435/17-ek) and will be reviewed by each of the Ethics Committees at the trial sites. A dedicated project is coordinating communication and dissemination of the trial.

**Trial registration number** NCT03434314

### Strengths and limitations of this study

- This is a particularly large multicentre randomized controlled trial (RCT) in aortic surgery addressing a fundamental issue in thoracoabdominal aortic aneurysm (TAAA) repair.
- The trial includes open and endovascular repair.
- It provides important 1-year data on SCI and mortality.

- PAPAartis looks at potential reductions in bleeding complications and endoleaks.
- Because of the nature of the intervention, it cannot be blinded.

## INTRODUCTION

This publication describes the study design and protocol of a clinical trial on Paraplegia Prevention in Aortic Aneurysm Repair by Thoracoabdominal Staging (“PAPAartis”) and follows the SPIRIT recommendations very closely (“Standard Protocol Items: Recommendations for Interventional Trials”).[1, 2]

### Background

Aortic aneurysms are permanent and localized dilations of particular portions of the aorta that grow unpredictably, but with a mean estimated rate of about two millimetres per year[3] and remain asymptomatic for long periods of time. Based on the aneurysm localization, one can distinguish between thoracic, abdominal and thoracoabdominal aortic aneurysms (TAAA). The latter are complex and generally categorized according to the Crawford classification (type I-IV), based on the anatomic extent of the aneurysm.[4–6]

A study comparing a historic cohort to a matched treated population showed that the dismal five-year survival rate of 13% given the natural course of the disease could be increased to 61% with open surgical repair.[7] Although successful aortic repair cures the disease, both open and endovascular modalities can result in paraplegia from spinal cord ischaemia and mortality is high. This particularly affects patients with aneurysms extending from the thoracic to the abdominal aorta and thus involving many segmental arteries (SAs) supplying the spinal cord. It has been assumed that paraplegia in open repair arises primarily due to temporary interruption of spinal cord blood supply during the operative procedure with a duration sufficient to damage cell bodies and nerve tracts in the spinal cord irreversibly. In endovascular repair, the chronic occlusion of several segmental arteries (as well as the temporary compromising of internal iliac blood supply during the procedure) induces paraplegia with a comparable incidence.[8] Various adjunctive perioperative neuroprotective strategies, such as motor/somatosensory evoked potential monitoring, meticulous perioperative blood pressure management, cerebrospinal fluid (CSF) drainage and even local spinal cord cooling, have been introduced to minimize ischaemic spinal cord injury (SCI).[9] These methods have achieved a notable decrease in the incidence of paraplegia and

1  
2  
3 paraparesis, but it remains high with an incidence of up to 20% for Crawford type II  
4  
5 30 aneurysms.[10]  
6

### 7 **Rationale**

8  
9 Members of the study team have found that the deliberate staged occlusion of segmental  
10  
11 arteries leading to the paraspinous collateral network and finally supplying the spinal cord can  
12  
13 trigger arterial collateralization, thus stabilizing blood supply to the spinal cord from alternate  
14  
15 35 inflow sources and potentially preventing ischaemia.[11–16] This approach was devised after  
16  
17 years of research that included recognition of the body's ability to tolerate segmental artery  
18  
19 sacrifice[17] given haemodynamic stability[18, 19] along with the identification of the  
20  
21 paraspinous arterial collateral network itself.[12, 16] One means of occluding arteries in the  
22  
23 clinical setting has been termed 'minimally invasive staged segmental artery coil  
24  
25 40 embolization' (MIS<sup>2</sup>ACE), which was proved feasible in 2015.[20] A consecutive case series  
26  
27 of over 50 patients lends credence to its safety.[21] This is thus the ideal time to carry out  
28  
29 such a trial – where the need to test efficacy, effectiveness and safety are paramount, but  
30  
31 before it has gained acceptance despite lack of evidence.

### 32 **Objectives**

33  
34 45 The primary objective of the PAPAartis trial is to test the hypothesis that MIS<sup>2</sup>ACE can  
35  
36 greatly reduce the incidence of ischaemic SCI and mortality compared to standard open  
37  
38 surgical or endovascular thoracoabdominal aneurysm repair alone.

### 39 **Trial Design**

40  
41 PAPAartis is a multi-national, open label, randomized controlled trial. It has two parallel  
42  
43 50 groups with equal allocation and the primary endpoint is to be tested in a superiority  
44  
45 framework.  
46  
47  
48  
49  
50  
51  
52  
53  
54  
55  
56  
57  
58  
59  
60



## METHODS AND ANALYSIS

### Study setting

To demonstrate the efficacy of MIS<sup>2</sup>ACE while minimizing risks, we chose participating sites with great expertise in the treatment of TAAA and tried to create a balance between those specializing in open and those in endovascular repair. The trial is jointly funded by the European Union as part of the Horizon 2020 programme and by the German Research Foundation, resulting in sites exclusively in Europe and with a strong emphasis on Germany. The recruiting sites (n=29) at commencement of the trial come from Austria (n=2), France (n=2), Germany (n=16), Italy (n=2), the Netherlands (n=1), Poland (n=2), Sweden (n=2), Switzerland (n=1) and the United Kingdom (n=1). In addition, Denmark provides an independent radiological core unit, Spain heads projects on health economics and patient satisfaction, the USA provide expert advice and Scotland heads a project on communication and dissemination. Patient recruitment will begin imminently and is planned to last two years.

### Eligibility criteria

#### *Inclusion criteria*

1. TAAA, Crawford type II or III (verified by radiological core unit)
2. planned open or endovascular repair of aneurysm within four months
3.  $\geq 18$  years old

The inclusion criteria are chosen to select a high risk (Crawford type II and III) population amenable to MIS<sup>2</sup>ACE therapy.

#### *Key exclusion criteria*

1. complicated (sub-) acute type B aortic dissection (but all chronic type B dissections will be included)
2. ruptured and urgent aneurysm (emergencies)
3. untreated aortic arch aneurysm (patients with a previous successful aortic arch aneurysm repair may be included independent of technique used)
4. bilaterally occluded iliac arteries or chronic total occlusion of left subclavian artery
5. pre-operative neurological deficits or spinal cord dysfunction
6. major untreated cardio-pulmonary disease
7. life-expectancy of less than one year
8. high risk for segmental artery embolism ('shaggy' aorta)

1  
2  
3 9. severe contrast agent allergy, severe reduction in glomerular filtration rate  
4  
5

6 The first two exclusion criteria were chosen since patients should not be subjected to  
7 85 additional risk as a result of the waiting time in the MIS<sup>2</sup>ACE arm before TAAA repair can be  
8 performed. The third exclusion criterion was chosen since these patients have considerable  
9 risk unrelated to the focus of the trial. Exclusion criterion 4 was chosen, since sufficient blood  
10 supply after MIS<sup>2</sup>ACE cannot be guaranteed on the one hand, and the prior occlusion implies  
11 that no additional treatment options are available in this anatomic region.  
12  
13  
14  
15

16 90 **Intervention**  
17

18 An overview of the trial is provided in Fig. 1. The treating physicians choose the mode of  
19 repair, after which the patient is randomized to the interventional or the control arm.  
20  
21

22 In the interventional arm (MIS<sup>2</sup>ACE), segmental arteries (SAs) will be occluded in one to  
23 three sessions some weeks before the aneurysm repair. Target SAs for coil/plug deployment  
24 will be identified considering the extent of the planned repair and individual SA anatomy. The  
25 95 occlusion of up to 7 SAs will be performed in a single session and conducted through a  
26 peripheral artery access (e.g. the common femoral artery) in local anaesthesia. Local  
27 anaesthesia is important so that patients can provide immediate feedback regarding potential  
28 neurological symptoms. Selected SAs will be catheterized (e.g. with a 5F catheter or 2.7F  
29 microcatheter). Microcoils or vascular plugs will be used for the occlusion itself, not however  
30 100 particles, which could cause unwanted microembolisms to the spinal cord directly. This will  
31 be performed in the proximal SA to ensure that the collateral network itself is not affected.  
32 The procedure may be done without spinal fluid drainage but this is left at the discretion of  
33 the centre. The length of the procedure, the amount of contrast dye and the dose of radiation  
34 105 will be documented exactly. The recommended interval between sessions is 21 days, with a  
35 strict safety minimum of 5 days.[11] Experts in endovascular catheterization in small vessels  
36 (e.g. cardiovascular surgeons, interventionalists, endovascular surgeons, interventional  
37 radiologists, paediatric cardiologists) will perform MIS<sup>2</sup>ACE. It is essential to maintain blood  
38 pressure above 140 mmHg, but for hypertensive patients, it is imperative that the post-  
39 110 operative pressure should not fall below their individual pre-operative systolic blood pressure  
40 during and after the procedure (invasive monitoring), ideally for at least 2 days. Anti-  
41 hypertensive drugs have to be adjusted accordingly. Therefore, the patient should stay in the  
42 IMCU for at least 48 hours, preferably longer. Reduction or even interruption of oral anti-  
43 hypertensive medication and use of low-dose vasopressors may be utilized and are preferable  
44 115 to volume therapy, which increases central venous pressure and thereby also CSF pressure.  
45  
46  
47  
48  
49  
50  
51  
52  
53  
54  
55  
56  
57  
58  
59  
60

1  
2  
3 In the control arm, treatment will be according to the optimal state-of-the art procedures at the  
4 local site. This ensures a real-world comparison in which the control arm is as strong as  
5 possible.  
6  
7

8  
9 As the trial proceeds, statistical monitoring and concomitant projects may identify need for  
10  
11 120 revisions to the intervention. These alterations will then be adopted with protocol  
12 amendments to optimize patient safety.  
13

## 14 **Endpoints**

### 15 *Primary endpoint*

16  
17  
18  
19 The primary endpoint is successful treatment of the aneurysm. We define “success” as (a) the  
20  
21 125 patient is alive and without substantial SCI 30 days after treatment, and (b) the aneurysm did  
22 not rupture and was excluded within six months of randomization.  
23

24  
25 Patients, who have not been treated within six months of randomization will be treated as  
26 failures to ensure that success/failure is defined for all randomized patients. This facilitates  
27 the intention to treat analysis (see below) and reduces the amount of missing data. During  
28  
29 recruitment, the Trial Steering Committee will ensure that time lapse alone leads only very  
30  
31 130 rarely to failure, otherwise this criterion will be reworked. The definition of success  
32 pertaining to mortality and SCI will be assessed 30 days after TAAA repair and “substantial  
33 SCI” means that the patient is unable to stand without assistance and is defined using the  
34 modified Tarlov scale[22] (see below) and assessed by a board certified neurologist whenever  
35 possible:  
36  
37  
38  
39 135

40  
41 0 – No lower extremity movement

42  
43 1 – Lower extremity motion without gravity

44  
45 2 – Lower extremity motion against gravity

46  
47 3 – Able to stand with assistance

48  
49 4 – Able to walk with assistance

50  
51 140 5 – Normal  
52

53  
54  
55 A training video describing this scale is provided for study personnel.

56  
57  
58 Treatment success for open repair is defined by complete resection and graft replacement in  
59 the absence of major related complications.  
60

1  
2  
3 145 *Secondary endpoints*  
4

5 For secondary endpoints, treatment success will be assessed and based on follow-up CT/MR  
6 images. Treatment success for endovascular repair is defined based on the position paper of  
7 the European Association for Cardio-Thoracic Surgery (EACTS) and the European Society of  
8 Cardiology (ESC), in collaboration with the European Association of Percutaneous  
9 Cardiovascular Interventions (EAPCI)[23] and takes into account upcoming guideline papers.  
10 Failure is defined as substantial progression of the aneurysm sac (> 3 mm) or the presence of  
11 major related complications (e.g. type I/III endoleaks). Completion angiography and/or  
12 follow-up MRI/CT from patients with endovascular repair will be conducted as part of  
13 clinical routine and will be sent to Copenhagen for assessment.  
14  
15  
16  
17  
18  
19  
20

21  
22 155 Note: The point in time “one year” refers to one year after TAAA repair. If patients retained  
23 in the full analysis set have not had a repair, then “30 days after TAAA repair” and “at one  
24 year” will be treated as 30 days and one year after randomization.  
25  
26

- 27 1. Substantial SCI at 30 days after TAAA repair and at one year
- 28 2. SCI according to the modified Tarlov scale from TAAA repair treatment to one year
- 29 3. All-cause mortality at 30 days and one year after TAAA repair
- 30 4. Length of stay in intensive care unit and intermediate care unit after TAAA repair
- 31 5. Sub-group analyses for open repair and endovascular repair separately
- 32 6. Re-operation for bleeding and drainage volumes in the first 24 h and use of blood  
33 products (only for open repair)
- 34 7. Cross-clamping times during open surgery
- 35 8. Residual aneurysm sac perfusion, i.e. type II endoleaks (only for endovascular repair)
- 36 9. Health-related quality of life will be collected using the WHOQOL-BREF[24] and the  
37 EuroQoL EQ-5D-5L instruments.[25] Hospital and other healthcare resource use will  
38 be collected. Healthcare costs, quality-adjusted life years (QALYs) and the  
39 incremental cost-effectiveness ratio (ICER) over one year will be calculated.[26]  
40  
41  
42  
43  
44  
45  
46  
47  
48 170

49 *Safety endpoints*  
50

51 Beyond AE/SAE reporting and descriptive statistics on radiation exposure, the following  
52 issues will receive special attention: acute kidney injury (AKI), respiratory failure and  
53 embolic events (also from debris). AKI is defined using the MAKE criteria [27], comparing  
54 baseline to the time-point of the primary outcome, where we note that the nature of the trial  
55 and logistics of the visits preclude the use of MAKE at precisely 90 days (MAKE90). We also  
56 record new dialysis separately and deterioration in chronic kidney disease (CKD) stage by at  
57  
58  
59  
60

1  
2  
3 least two stages. Acute and chronic kidney disease will be distinguished. Having identified  
4 particular safety risks in the trial aids us in collecting appropriate data, assessing and reporting  
5 these harms, as recommended by SPIRIT. [1, 2] We do not use these to define stopping  
6  
7 180 criteria however, which is left at the discretion of the Data Monitoring Committee.  
8  
9

### 10 **Participant timeline**

11  
12 Please refer to Fig. 1 for details of the visit schedule and participant timeline.  
13  
14

### 15 **Sample size and recruitment**

16  
17 185 Estimates of effect size are difficult for several reasons. Foremost, there are large  
18 discrepancies between outcome rates quoted in the literature. Moreover, the impact of recent  
19 improvements in techniques on outcomes cannot yet be quantified accurately and, finally the  
20 effect size depends on the improvement due to the trial intervention, which, in turn, depends  
21 on anatomy, post-repair management and other complex factors. Taking a random effects  
22 model of the data from large recent publications for open [10, 28–30] and endovascular repair  
23 [31–33] one finds an estimated incidence of 18% (95% prediction interval 15% to 23%) for  
24 open repair and a very uncertain 24% (2 to 79)% for endovascular repair. The prediction  
25 interval as opposed to the confidence interval provides the correct bounds for what can be  
26 190 expected in the trial.[34] The resources and time available to the study allow for the  
27 recruitment of 500 patients. Assuming success rates of 80% in the control arm and 90% in the  
28 intervention arm and using a group-sequential design [35] with two interim analyses, this then  
29 implies a power of just over 87%.[36] The definitions of the primary endpoint and the full  
30 analysis set imply that only very few dropouts are to be expected for this analysis and that  
31 compliance will not be a problem. The severity of the therapy and recovery times mean that  
32 loss to follow-up is not expected to be a major factor.  
33  
34 195  
35  
36  
37  
38  
39  
40  
41  
42  
43 200  
44

45 The planned recruitment is between 8 and 9 patients per site per year. This is roughly half the  
46 number of patients that meet the inclusion criteria. However, slow recruitment plagues many  
47 trials and mitigation strategies have already been developed. A list of interested recruitment  
48 sites ( $n > 10$ ) is being collected to expand the consortium. Statistical monitoring will be used  
49 to identify reasons for screened patients not being included in the trial so that minor and  
50 clinically justified amendments to the trial protocol can address these issues, e.g. through  
51 adjustments to the inclusion and exclusion criteria. Finally, a newsletter including recruitment  
52 205 by site will be distributed at regular intervals to spawn healthy competition among the team  
53 members.  
54  
55  
56  
57  
58  
59  
60

1  
2  
3 **210 Randomization**  
4

5 Patients will be randomized in a 1:1 ratio to the intervention and control arms with a random  
6 number generator. Randomization will be performed online at the recruitment centres with a  
7 tool prepared and hosted by the Clinical Trial Centre Leipzig  
8

9  
10  
11 Some of the centres are expected to recruit a very small number of patients, meaning that  
12  
13 **215** block randomization stratified by centre is unfeasible. Although minimization schemes could  
14 be used to attain roughly balanced allocation of patients, even at the centre level, there is  
15 controversy about the methods needed to analyse such trials. To avoid potential complexities  
16 in analysis, we have thus opted for a very simple randomization scheme, knowing that small  
17 imbalances in the number of patients per arm are to be expected.  
18  
19

20  
21  
22 **220 Selected data collection methods**  
23

24 Neurological examinations will be performed by board certified neurologists whenever  
25 possible. If such an examination is made upon discharge and no signs of impairment are  
26 found, then verification that this holds at 30 days is only required by telephone. Any signs of  
27 impairment necessitate a full examination at 30 days however.  
28

29  
30  
31  
32 **225** If the assessment of Crawford classification or successful treatment carried out by the  
33 radiological unit in Copenhagen should disagree with the treating physician's opinion, the  
34 blinded independent Endpoint Committee will make the final decision. The definition of  
35 success does not necessarily require that the MRI/CT be made within six months of  
36 randomization. Later verification of success is acceptable.  
37  
38

39  
40  
41 **230 Data management**  
42

43 The EDC tool SecuTrial®, developed and distributed by interActive Systems GmbH, is used  
44 for creation of the study database. Data entry uses eCRF data entry masks and data changes  
45 are tracked automatically including date, time and person who entered/changed information  
46 (audit trail). Major corrections or major missing data have to be explained.  
47  
48

49  
50  
51 **235** The information entered into the eCRF by the investigator or an authorised member of the  
52 study team is systematically checked for completeness, consistency and plausibility by  
53 routines implemented in the database, such that discrepancies can be dealt with at data entry.  
54 Errors and warnings are listed in a validation report and can be resolved at any time during  
55 the data entry process. On completion of data entry, the site staff flags the eCRF-pages as  
56  
57  
58  
59  
60 **240** 'data entry completed'.

1  
2  
3 Throughout the study, a backup of all data is made daily. Unauthorised access to patient data  
4 is prevented by the access concept of the study database, which is based on strict file system  
5 permission.  
6  
7

8  
9 At the end of the study, once the database is complete and accurate, the database will be  
10  
11 245 locked. Subsequent changes to the database are possible only by joint written agreement  
12 between co-ordinating investigator, trial statistician and data manager.  
13  
14

## 15 **Statistical methods**

### 16 *Analysis Sets*

17  
18  
19 If patients retract informed consent before any procedure is performed (repair or SA  
20  
21 250 occlusion), they will be excluded from the primary analysis, since we expect some control  
22 arm patients to be dissatisfied with their assigned treatment, retract consent, and seek  
23 MIS<sup>2</sup>ACE outside of the trial. Including them would be anti-conservative. The full analysis  
24 set (FAS) includes all randomized patients that have had a session for occluding segmental  
25 arteries (intervention arm) or have had a repair procedure (conventional arm). Randomized  
26  
27 255 patients whose aneurysm ruptures or who die from any cause will be included in the FAS,  
28 irrespective of the above stipulations.  
29  
30  
31  
32  
33

34 If a sufficiently large number of patients violate the trial protocol, particularly regarding the  
35 trial intervention, then a per protocol analysis will be performed using the set of patients that  
36 conformed to the major terms in the protocol. A precise definition of the per protocol set will  
37  
38 260 be provided in the statistical analysis plan.  
39  
40

41 Patients are generally analysed regarding safety according to treatment received. In our case,  
42 an undue delay between randomization and treatment is a risk factor, meaning that such  
43 patients will be included in the safety analyses even if they have not yet received treatment.  
44  
45  
46

### 47 *Statistical Analysis*

48  
49  
50 265 The primary analysis is an intention to treat (ITT) analysis based on the FAS and makes use  
51 of a generalized linear mixed model with the logit link function. The success/failure of  
52 treatment will be the dependent variable. The assigned randomization arm, mode of repair  
53 (open or endovascular repair), the Crawford type and the euroSCORE II are fixed effects and  
54 the centre will be treated as a random effect. The euroSCORE II already takes age, sex and  
55  
56 270 other relevant factors into account. The interaction term between the randomization arm and  
57 the other fixed effects will only be included if evidence for a strong interaction effect are seen,  
58  
59  
60



1  
2  
3 since this would otherwise lead to a substantial loss of power.[37, 38] As a supplementary  
4 analysis, an analogous mixed model will be performed with a unity link function to provide  
5 estimates and confidence intervals for absolute risk differences.  
6  
7

8  
9 275 The definitions of the full analysis set and the primary endpoint are chosen so that almost no  
10 missing data are expected. If success cannot be ascertained with certainty, the patient will be  
11 treated as a failure. Sensitivity analyses will be used to gauge the effect of missing data on the  
12 estimates and conclusions drawn.  
13  
14

15  
16 Interim analyses are planned 30 days after 50% of patients (n=250) and 75% (n=375) have  
17  
18 280 been treated for the aneurysm. The primary endpoint will be analysed and randomization can  
19 be terminated for efficacy if a p-value of 0.0030 (first interim analysis) or 0.018 (second  
20 interim analysis) is reached. The p-value for demonstrating efficacy in the final analysis is  
21 0.044.  
22  
23  
24

25  
26 Analysis of binary secondary outcomes will be treated on the same footing as the primary  
27  
28 285 analysis. Mortality at 30 days will be treated as binary as opposed to time-to-event, since  
29 prolonging life in the post-operative phase for a matter of days is not considered clinically  
30 relevant. Subgroup analyses of the two Crawford types and of the two modes of repair will be  
31 presented in the form of contingency tables. Mixed model Cox regression with covariates  
32 euroSCOREII, Crawford type and mode of repair will be used for one-year mortality with  
33 randomization arm as the independent variable of interest and centre as a random effect. If the  
34  
35 290 assumption of proportional hazards is violated substantially, a logistic regression will be used.  
36 Kaplan-Meier curves will be used to represent the data.  
37  
38  
39  
40  
41

42  
43 In explorative analyses, the number of patent segmental arteries and the number occluded will  
44 be taken into account with respect to SCI and mortality. The anatomical position of the  
45  
46 295 segmental arteries may also be used.  
47

48 ICU-time and ICMU-time will be analysed with a linear mixed effects model with the same  
49 fixed and random effects as in the primary analysis and may be log transformed if warranted.  
50 Re-operation for bleeding and type II endoleaks will be presented for the subgroups of  
51 patients treated with open or endovascular repair, respectively.  
52  
53

54  
55 300 Descriptive statistics will be used for further safety outcomes along with odds ratios  
56 according to treatment received, as appropriate.  
57  
58

59 Total mean cost per patient over one year will be estimated by multiplying healthcare  
60 resource use collected in the trial by unit costs from the country health system.[39] QALYs



1  
2  
3 will be calculated in each treatment group using the EQ-5D-5L value set.[40] The ICER will  
4  
5 305 be calculated, and will inform whether MIS<sup>2</sup>ACE is cost-effective on average for patients with  
6 TAAA Crawford type II or III. Bootstrap methods will be used to characterize  
7  
8 uncertainty.[26]  
9

10 Further details will be provided in a statistical analysis plan.  
11  
12

### 13 **Statistical monitoring**

14  
15 310 The trial conduct will be closely supervised by means of central and statistical monitoring.  
16 The objectives are a) to detect safety relevant signals as soon as possible, b) to detect non-  
17 compliance and relevant protocol violations and to prevent their future occurrence by prompt  
18 reaction, c) to prevent missing visits or measurements by prompt reminders and d) to explore  
19 means of improving on the MIS<sup>2</sup>ACE procedure.  
20  
21  
22  
23

24  
25 315 Statistical and central monitoring will start immediately after inclusion of the first patient. The  
26 relevant reports and descriptive statistics will be updated and discussed at the regular  
27 meetings of the Leipzig study team. Problems and abnormalities will be presented at regular  
28 intervals to the co-ordinating investigator.  
29  
30  
31

### 32 **On-site monitoring**

33  
34  
35 320 A risk-based monitoring strategy will be implemented as required by ICH E6 (Chapter 5.0)  
36 According to the risk analysis, treatment delivery parameters, adverse events, follow-up  
37 information, data transmission and protection and informed consent documents comprise risk-  
38 bearing trial aspects and will be monitored.  
39  
40

41  
42  
43  
44 325 Prior to recruitment, each participating centre will receive a site initiation visit, during which  
45 the trial protocol (if necessary) and the eCRFs will be reviewed with centre staff and any  
46 necessary training will be provided. During the study, trial monitors will maintain regular  
47 contact with trial centre staff (by telephone/fax/email/post) to track the progress of the trial,  
48 respond to any problems, and provide general assistance and support.  
49

50  
51  
52  
53 330 The first regular monitoring visit at a site will take place after the randomization of the site's  
54 first patient to check protocol compliance and to prevent further systematic errors due to  
55 misunderstandings. Trial site visits will take place on a regular basis. The frequency of  
56 monitoring visits will depend on the trial site's recruitment rate as well as on potential  
57 problems detected during previous on-site visits or by central monitoring.  
58  
59  
60

1  
2  
3 Prior to every scheduled on-site visit, the monitor will receive summaries of the site's patient  
4 data already documented in the database, and if applicable with data indicating possible  
5 335 data already documented in the database, and if applicable with data indicating possible  
6 protocol deviations or inconsistencies. During the visits, the monitor will a) check informed  
7 consent forms of all patients enrolled, b) perform source data verification of key data in a  
8 random sample of at least 20% of the site's patients, c) perform targeted source data  
9 verification for patients with possible deviations, d) discuss open queries raised by data  
10 management or drug safety personnel, e) check essential parts of the investigator site file, f)  
11 340 check source data for AEs or SAEs, which have not been properly reported in the CRF/eCRF  
12 and g) check for major GCP-breaches and/or protocol violations.  
13  
14  
15  
16  
17  
18

### 19 **Harms**

20  
21 Safety endpoints related directly to MIS<sup>2</sup>ACE include kidney failure, respiratory failure and  
22 embolic events (also from debris). These endpoints will be listed according to treatment  
23 345 received with a breakdown according to the number of MIS<sup>2</sup>ACE sessions. In addition, data  
24 on radiation exposure will be collected and presented descriptively.  
25  
26  
27  
28

### 29 **Patient and Public Involvement**

30  
31 The trial protocol was developed in part by physicians with years of experience in treating  
32 TAAA patients. Their experience indicated that paraplegia is the greatest concern that patients  
33 350 have when deliberating on whether or not to be treated, and was thus chosen along with  
34 mortality for the primary outcome. A qualitative study will recruit about 30 patients after  
35 surgical wound healing for one-on-one in-depth interviews in different sites of the trial.  
36 Purposive sampling will be used to select information-rich cases to be interviewed, according  
37 to criteria of clinical outcome, age, gender and other patient social variables as social class or  
38 ethnicity. The finalization of the data collection process will be determined following the  
39 principle of theoretical saturation. Interviews will take place with an experienced qualitative  
40 researcher in the patient's own language in a mutually convenient, private comfortable place.  
41 A literature review will be conducted to broadly inform the interview guide, though patients  
42 355 will be encouraged to speak freely. The goal is for the patient to express in his or her own words  
43 the impact on their life of diagnosis and treatment, and look at changes that occur in quality of  
44 life, family, work, lifestyle and social environment from an ethnographic standpoint. The  
45 interviews will be recorded and transcribed literally. Summative content analysis will be  
46 performed using NVivo<sup>TM</sup> software (QSR International, Melbourne, Australia). Patients and  
47 the public have not yet been involved directly in the trial.  
48  
49  
50  
51 360  
52  
53  
54  
55  
56  
57  
58  
59  
60

## ETHICS AND DISSEMINATION

### Approval and registration

The trial protocol and the informed consent form have been reviewed and approved by the lead Ethics Committee from the University of Leipzig (435/17-ek) and will be reviewed by each of the Ethics Committees at the trial sites. The Federal Office for Radiation Protection in Germany has also approved the additional radiation use in the intervention group (Z5-22462/2 – 2017-073). The trial has been registered with clinicaltrials.gov (NCT03434314).

Amendments to the protocol will be reviewed by Ethics Committees. Informed consent will be obtained before collecting any patient data and patient information.

### External boards

A Data Monitoring Committee (DMC) has been established to oversee patient safety and data quality in the trial. It consists of three members with expertise in aortic surgery, neurology and medical statistics. The DMC charter states that its role is to “safeguard the interests of trial participants, assess the safety and efficacy of the interventions during the trial, and assist and advise the trial steering committee to protect the validity and credibility of the trial. In order to do this, the DMC evaluates the results of the regular reports and their influence on the risk assessment for the patients as well as for the integrity of the trial. The DMC gives its recommendations at regular intervals as to whether the continuation of the trial is justifiable.”

Only the trial statistician and the DMC members will have access to the interim analyses until the end of the trial. At the inaugural meeting the members of the DMC will be asked to discuss whether SAEs related to the MIS<sup>2</sup>ACE procedure should be sent to them without delay.

An expert advisory board consisting of four international experts on TAAA repair provide the active trial members with independent advice regarding trial design and conduct. It meets with leading members of the consortium on an annual basis and is kept abreast of the trial’s progress.

### Dissemination

One project partner (MODUS Research and Innovation, Edinburgh, Scotland) has a project dedicated to communication and dissemination. Key channels, tools and target audiences for dissemination and use of project results will be identified in a Communication and Dissemination Plan. The dissemination activities will be two-fold: basic communication about

1  
2  
3 the project to the public and specific dissemination to four target communities. One objective  
4 of the dissemination plan will be to support the project partners with the clinical recruitment.  
5 The other objective will be to reach out to wide audiences outside the project consortium at  
6  
7  
8 400 national, European and international levels (medical and health professionals, academics,  
9 medical and biomedical industries, policy makers, EU regulators (e.g. the European  
10 Medicines Agency), patients groups, health NGOs, civil societies, scientific and lay media.  
11 The dissemination vehicles will be seminars, medical conferences and publications, project  
12 partners' individual communication streams. Dissemination material may include a project  
13  
14  
15  
16  
17 405 leaflet, newsletter, press releases and a trial website.

### 19 **Data Sharing Statement**

21 We are committed to transparent research and are aware of the International Committee of  
22 Medical Journal Editors (ICMJE) recommendations on data sharing. After publication of the  
23 major results and upon reasonable request from researchers performing an individual patient  
24  
25  
26  
27 410 data meta-analysis, individual patient data that underlie published results will be shared after  
28 de-identification. This requires approval by the local Institutional Review Board (IRB) of the  
29 researcher requesting the data along with public registration of the meta-analysis. Summary  
30 statistics that go beyond the scope of published material will be made available to researchers  
31 for meta-analysis upon reasonable request and if the necessary data analysis is not unduly  
32  
33  
34  
35  
36 415 time-consuming. Together with publication of the main results, the trial protocol in full will  
37 be made publically available as well as the statistical analysis plan.  
38  
39  
40  
41  
42  
43  
44  
45  
46  
47  
48  
49  
50  
51  
52  
53  
54  
55  
56  
57  
58  
59  
60

## REFERENCES

- 1 Chan A-W, Tetzlaff JM, Altman DG, et al. SPIRIT 2013 statement: Defining standard protocol items for clinical trials. *Ann Intern Med* 2013;158(3):200–07.
- 420 2 Chan A-W, Tetzlaff JM, Gøtzsche PC, et al. SPIRIT 2013 explanation and elaboration: Guidance for protocols of clinical trials. *BMJ* 2013;346:e7586.
- 3 Eleftheriades JA. Natural history of thoracic aortic aneurysms: Indications for surgery, and surgical versus nonsurgical risks. *Ann Thorac Surg* 2002;74(5):S1877-S1880.
- 4 Crawford ES, Crawford JL, Safi HJ, et al. Thoracoabdominal aortic aneurysms: preoperative and intraoperative factors determining immediate and long-term results of operations in 605 patients. *J Vasc Surg* 1986;3(3):389–404.
- 425 5 Eleftheriades JA. Thoracic aortic aneurysm: reading the enemy's playbook. *Curr Probl Cardiol* 2008;33(5):203–77.
- 6 Frederick JR, Woo YJ. Thoracoabdominal aortic aneurysm. *Ann Cardiothorac Surg* 2012;1(3):277–85.
- 430 7 Miller C3, Porat EE, Estrera AL, et al. Number needed to treat: analyzing of the effectiveness of thoracoabdominal aortic repair. *Eur J Vasc Endovasc Surg* 2004;28(2):154–57.
- 8 Greenberg RK, Lu Q, Roselli EE, et al. Contemporary analysis of descending thoracic and thoracoabdominal aneurysm repair: a comparison of endovascular and open techniques. *Circulation* 2008;118(8):808–17.
- 435 9 Etz CD, Weigang E, Hartert M, et al. Contemporary spinal cord protection during thoracic and thoracoabdominal aortic surgery and endovascular aortic repair: a position paper of the vascular domain of the European Association for Cardio-Thoracic Surgerydagger. *Eur J Cardiothorac Surg* 2015;47(6):943–57.
- 440 10 Conrad MF, Crawford RS, Davison JK, et al. Thoracoabdominal Aneurysm Repair: A 20-Year Perspective. *Ann Thorac Surg* 2007;83(2):S856-S861.
- 11 Etz CD, Luehr M, Kari FA, et al. Spinal cord perfusion after extensive segmental artery sacrifice: can paraplegia be prevented? *Eur J Cardiothorac Surg* 2007;31(4):643–48.
- 445 12 Etz CD, Kari FA, Mueller CS, et al. The collateral network concept: remodeling of the arterial collateral network after experimental segmental artery sacrifice. *J Thorac Cardiovasc Surg* 2011;141(4):1029–36.
- 13 Zoli S, Etz CD, Roder F, et al. Experimental two-stage simulated repair of extensive thoracoabdominal aneurysms reduces paraplegia risk. *Ann Thorac Surg* 2010;90(3):722–29.
- 450

- 1  
2  
3  
4  
5  
6  
7  
8  
9  
10  
11  
12  
13  
14  
15  
16  
17  
18  
19  
20  
21  
22  
23  
24  
25  
26  
27  
28  
29  
30  
31  
32  
33  
34  
35  
36  
37  
38  
39  
40  
41  
42  
43  
44  
45  
46  
47  
48  
49  
50  
51  
52  
53  
54  
55  
56  
57  
58  
59  
60
- 14 Luehr M, Salameh A, Haunschild J, et al. Minimally invasive segmental artery coil embolization for preconditioning of the spinal cord collateral network before one-stage descending and thoracoabdominal aneurysm repair. *Innovations (Phila)* 2014;9(1):60–65.
- 455 15 Geisbusch S, Stefanovic A, Koruth JS, et al. Endovascular coil embolization of segmental arteries prevents paraplegia after subsequent thoracoabdominal aneurysm repair: an experimental model. *J Thorac Cardiovasc Surg* 2014;147(1):220–26.
- 16 Etz CD, Kari FA, Mueller CS, et al. The collateral network concept: A reassessment of the anatomy of spinal cord perfusion. *J Thorac Cardiovasc Surg* 2011;141(4):1020–28.
- 460 17 Etz CD, Halstead JC, Spielvogel D, et al. Thoracic and thoracoabdominal aneurysm repair: is reimplantation of spinal cord arteries a waste of time? *Ann Thorac Surg* 2006;82(5):1670–77.
- 18 Etz CD, Homann TM, Luehr M, et al. Spinal cord blood flow and ischemic injury after experimental sacrifice of thoracic and abdominal segmental arteries. *Eur J Cardiothorac Surg* 2008;33(6):1030–38.
- 465 19 Etz CD, Luehr M, Kari FA, et al. Paraplegia after extensive thoracic and thoracoabdominal aortic aneurysm repair: does critical spinal cord ischemia occur postoperatively? *J Thorac Cardiovasc Surg* 2008;135(2):324–30.
- 20 Etz CD, Debus ES, Mohr F-W, et al. First-in-man endovascular preconditioning of the paraspinal collateral network by segmental artery coil embolization to prevent ischemic spinal cord injury. *J Thorac Cardiovasc Surg* 2015;149(4):1074–79.
- 470 21 Branzan D, Etz CD, Moche M, et al. Ischaemic preconditioning of the spinal cord to prevent spinal cord ischaemia during endovascular repair of thoracoabdominal aortic aneurysm: First clinical experience. *EuroIntervention* 2018;14(7):828–35.
- 475 22 Chiesa R, Melissano G, Marrocco-Trischitta MM, et al. Spinal cord ischemia after elective stent-graft repair of the thoracic aorta. *J Vasc Surg* 2005;42(1):11–17.
- 23 Grabenwöger M, Alfonso F, Bachet J, et al. Thoracic Endovascular Aortic Repair (TEVAR) for the treatment of aortic diseases: A position statement from the European Association for Cardio-Thoracic Surgery (EACTS) and the European Society of Cardiology (ESC), in collaboration with the European Association of Percutaneous Cardiovascular Interventions (EAPCI). *Eur J Cardiothorac Surg* 2012;42(1):17–24.
- 480 24 THE WHOQOL GROUP. Development of the World Health Organization WHOQOL-BREF Quality of Life Assessment. *Psychological Medicine* 1998;28(3):551–58.



- 1  
2  
3 25 Janssen MF, Pickard AS, Golicki D, et al. Measurement properties of the EQ-5D-5L  
4 compared to the EQ-5D-3L across eight patient groups: A multi-country study. *Qual*  
5 485 *Life Res* 2013;22(7):1717–27.  
6  
7 [https://www.ncbi.nlm.nih.gov/pmc/articles/PMC3764313/pdf/11136\\_2012\\_Article\\_322.](https://www.ncbi.nlm.nih.gov/pmc/articles/PMC3764313/pdf/11136_2012_Article_322.pdf)  
8 pdf.  
9  
10  
11 26 Ramsey SD, Willke RJ, Glick H, et al. Cost-effectiveness analysis alongside clinical  
12 trials II-An ISPOR Good Research Practices Task Force report. *Value Health*  
13 490 2015;18(2):161–72.  
14  
15  
16 27 Billings FT, Shaw AD. Clinical trial endpoints in acute kidney injury. *Nephron Clin*  
17 *Pract* 2014;127(1-4):89–93.  
18  
19  
20 28 Fehrenbacher JW, Siderys H, Terry C, et al. Early and late results of descending thoracic  
21 and thoracoabdominal aortic aneurysm open repair with deep hypothermia and  
22 495 circulatory arrest. *J Thorac Cardiovasc Surg* 2010;140(6, Supplement):S154-S160.  
23  
24  
25 29 Zoli S, Roder F, Etz CD, et al. Predicting the Risk of Paraplegia After Thoracic and  
26 Thoracoabdominal Aneurysm Repair. *Ann Thorac Surg* 2010;90(4):1237–45.  
27  
28  
29 30 Coselli JS, LeMaire SA, Preventza O, et al. Outcomes of 3309 thoracoabdominal aortic  
30 500 aneurysm repairs. *J Thorac Cardiovasc Surg* 2016;151(5):1323–37.  
31  
32  
33 31 Katsargyris A, Oikonomou K, Kouvelos G, et al. Spinal cord ischemia after  
34 endovascular repair of thoracoabdominal aortic aneurysms with fenestrated and  
35 branched stent grafts. *J Vasc Surg* 2015;62(6):1450–56.  
36  
37  
38 32 Bisdas T, Panuccio G, Sugimoto M, et al. Risk factors for spinal cord ischemia after  
39 505 endovascular repair of thoracoabdominal aortic aneurysms. *J Vasc Surg*  
40 2015;61(6):1408–16.  
41  
42  
43 33 Dias NV, Sonesson B, Kristmundsson T, et al. Short-term outcome of spinal cord  
44 ischemia after endovascular repair of thoracoabdominal aortic aneurysms. *European*  
45 *Journal of Vascular and Endovascular Surgery* 2015;49(4):403–09.  
46  
47  
48 510 34 Riley RD, Higgins JPT, Deeks JJ. Interpretation of random effects meta-analyses. *BMJ*  
49 2011;342:d549.  
50  
51  
52 35 O'Brien PC, Fleming TR. A multiple testing procedure for clinical trials. *Biometrics*  
53 1979;35(3):549–56.  
54  
55 36 Hintze J. PASS. NCSS, LLC. Kaysville, Utah, USA.: PASS 11 2011.  
56  
57 515 37 Aitkin M. The Analysis of Unbalanced Cross-Classifications. *Journal of the Royal*  
58 *Statistical Society. Series A (General)* 1978;141(2):195.  
59  
60

- 1  
2  
3 38 Nelder JA. A Reformulation of Linear Models. *Journal of the Royal Statistical Society.*  
4 *Series A (General)* 1977;140(1):48.  
5  
6 39 Stenberg K, Lauer JA, Gkountouras G, et al. Econometric estimation of WHO-CHOICE  
7  
8 520 country-specific costs for inpatient and outpatient health service delivery. *Cost Eff*  
9 *Resour Alloc* 2018;16:11.  
10  
11 40 Ludwig K, Graf von der Schulenburg J-M, Greiner W. German Value Set for the EQ-  
12 5D-5L. *Pharmacoeconomics* 2018;36(6):663–74.  
13  
14  
15  
16  
17  
18  
19  
20  
21  
22  
23  
24  
25  
26  
27  
28  
29  
30  
31  
32  
33  
34  
35  
36  
37  
38  
39  
40  
41  
42  
43  
44  
45  
46  
47  
48  
49  
50  
51  
52  
53  
54  
55  
56  
57  
58  
59  
60



## 525 **Authors' contributions**

1  
2  
3  
4  
5 DP: study conception and design, statistical methods and sample size calculations, writing and  
6 reviewing of the manuscript. MC, TK, GM, KvA, JH: study design with particular focus on  
7 cardiovascular endpoints, reviewing of the manuscript. LL: study design with particular focus  
8 on radiological methods, reviewing of the manuscript. PN, KP: study design, ethics, data  
9 management, writing and reviewing of the manuscript. JP: study design with particular focus  
10 on neurological methods and endpoints, reviewing of the manuscript. DE: study design with  
11 particular focus on health economics and patient satisfaction, reviewing of the manuscript.  
12 NR: study design for portion on qualitative patient satisfaction, reviewing of the manuscript.  
13 CDE: research that lay foundation for trial, initial study conception, study design, writing and  
14 reviewing of the manuscript. All authors have read and approved the final manuscript.  
15  
16  
17  
18  
19  
20  
21  
22  
23

## 23 **Funding statement**

24  
25  
26 This project has received funding from the European Union's Horizon 2020 research and  
27 innovation programme under grant agreement 733203 and from the German Research  
28 Foundation under grant number ET 127/2-1.  
29  
30

## 31 **Competing interests statement**

32  
33  
34 The authors have no competing interests related to this trial.  
35

## 36 **License statement**

37  
38  
39 I, the Submitting Author has the right to grant and does grant on behalf of all authors of the  
40 Work (as defined in the below author licence), an exclusive licence and/or a non-exclusive  
41 licence for contributions from authors who are: i) UK Crown employees; ii) where BMJ has  
42 545 agreed a CC-BY licence shall apply, and/or iii) in accordance with the terms applicable for  
43 US Federal Government officers or employees acting as part of their official duties; on a  
44 worldwide, perpetual, irrevocable, royalty-free basis to BMJ Publishing Group Ltd ("BMJ")  
45 its licensees and where the relevant Journal is co-owned by BMJ to the co-owners of the  
46 Journal, to publish the Work in BMJ Open and any other BMJ products and to exploit all  
47 rights, as set out in our licence.  
48  
49  
50  
51  
52  
53  
54

55  
56 The Submitting Author accepts and understands that any supply made under these terms is  
57 made by BMJ to the Submitting Author unless you are acting as an employee on behalf of  
58 your employer or a postgraduate student of an affiliated institution which is paying any  
59 applicable article publishing charge ("APC") for Open Access articles. Where the Submitting  
60

1  
2  
3 Author wishes to make the Work available on an Open Access basis (and intends to pay the  
4 relevant APC), the terms of reuse of such Open Access shall be governed by a Creative  
5 Commons licence – details of these licences and which Creative Commons licence will apply  
6 to this Work are set out in our licence referred to above.  
7  
8  
9

10  
11 560  
12

### 13 **Figure Legends**

14  
15  
16 **Figure 1:** Schematic portrayal of the participant timeline and visit schedule for the PAPAartis  
17 trial.  
18  
19  
20  
21  
22  
23  
24  
25  
26  
27  
28  
29  
30  
31  
32  
33  
34  
35  
36  
37  
38  
39  
40  
41  
42  
43  
44  
45  
46  
47  
48  
49  
50  
51  
52  
53  
54  
55  
56  
57  
58  
59  
60

max. 6 months BMJ Open

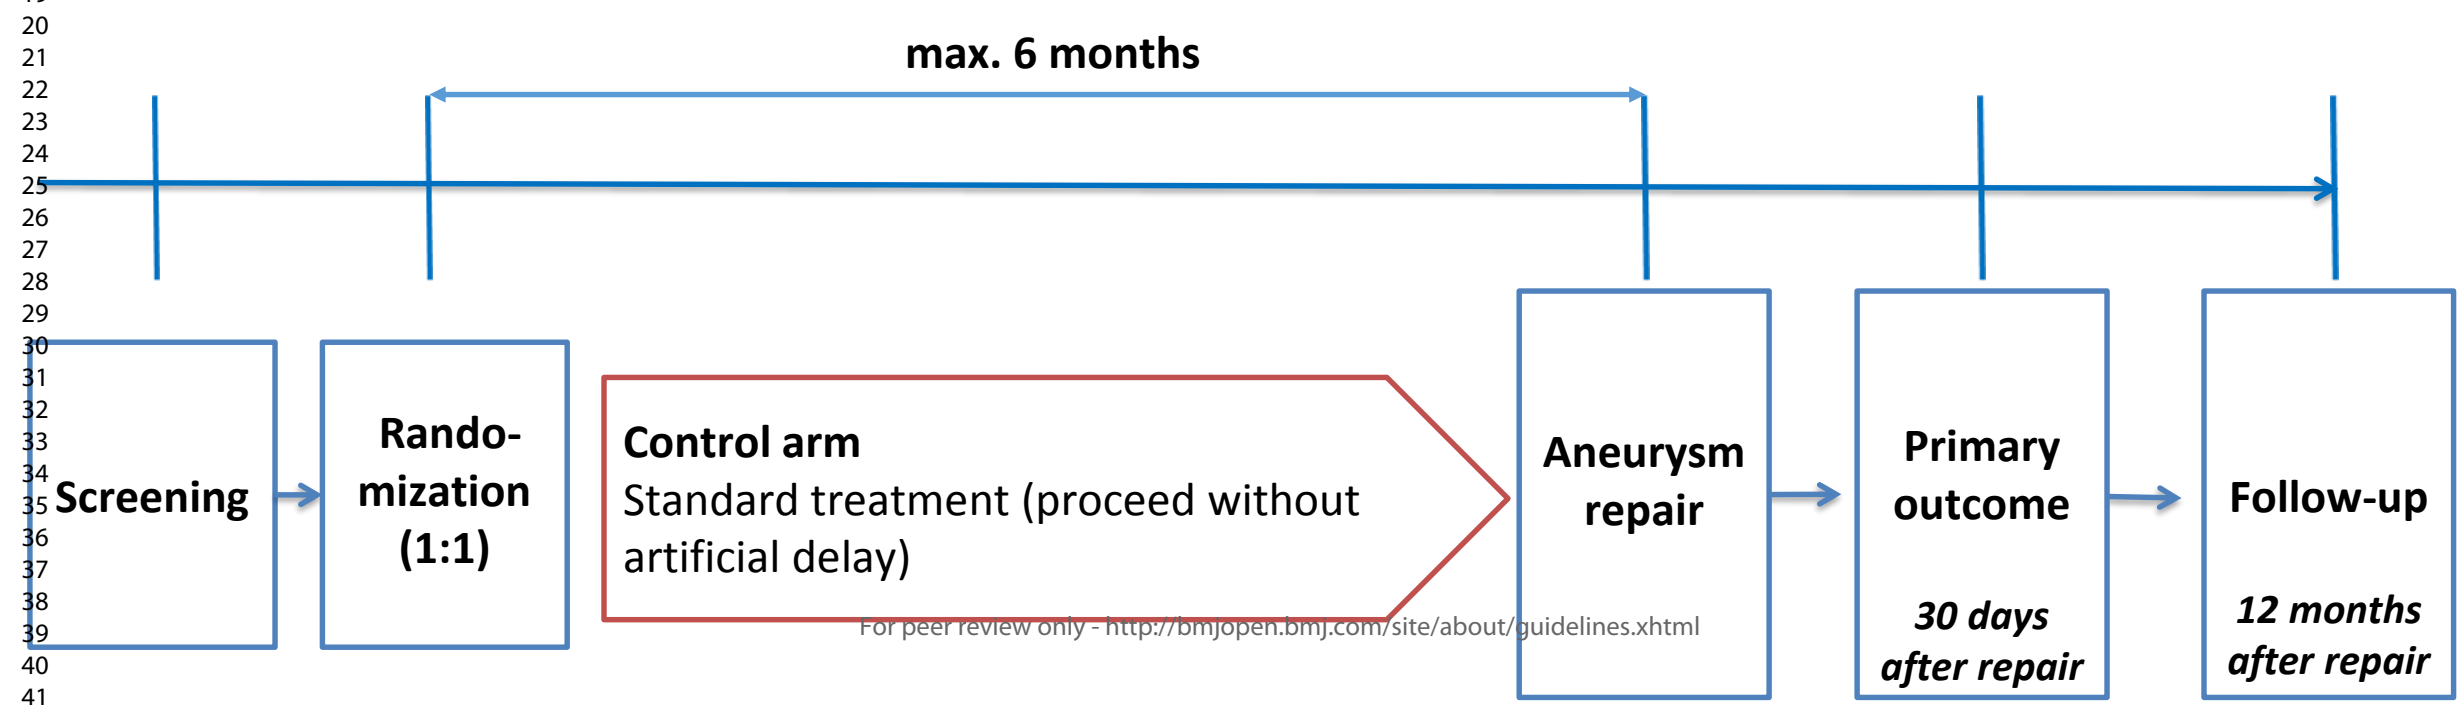



SPIRIT 2013 Checklist: Recommended items to address in a clinical trial protocol and related documents\*

| Section/item                      | Item No | Description                                                                                                                                                                                                                                                                                                           |
|-----------------------------------|---------|-----------------------------------------------------------------------------------------------------------------------------------------------------------------------------------------------------------------------------------------------------------------------------------------------------------------------|
| <b>Administrative information</b> |         |                                                                                                                                                                                                                                                                                                                       |
| Title                             | 1       | Descriptive title identifying the study design, population, interventions, and, if applicable, trial acronym<br><br><i>Title page</i>                                                                                                                                                                                 |
| Trial registration                | 2a      | Trial identifier and registry name. If not yet registered, name of intended registry<br><br><i>End of Abstract</i>                                                                                                                                                                                                    |
|                                   | 2b      | All items from the World Health Organization Trial Registration Data Set<br><br><i>Available through the <a href="http://clinicaltrials.gov">clinicaltrials.gov</a> website and in the full trial protocol</i>                                                                                                        |
| Protocol version                  | 3       | Date and version identifier<br><br><i>Not applicable</i>                                                                                                                                                                                                                                                              |
| Funding                           | 4       | Sources and types of financial, material, and other support<br><br><i>Lines 508-510</i>                                                                                                                                                                                                                               |
| Roles and responsibilities        | 5a      | Names, affiliations, and roles of protocol contributors<br><br><i>Lines 496-506</i>                                                                                                                                                                                                                                   |
|                                   | 5b      | Name and contact information for the trial sponsor<br><br><i>Not applicable (there is no legal "sponsor" function, but the coordinating investigator was named)</i>                                                                                                                                                   |
|                                   | 5c      | Role of study sponsor and funders, if any, in study design; collection, management, analysis, and interpretation of data; writing of the report; and the decision to submit the report for publication, including whether they will have ultimate authority over any of these activities<br><br><i>Not applicable</i> |

- 1  
2  
3  
4  
5  
6  
7  
8  
9
- 5d Composition, roles, and responsibilities of the coordinating centre, steering committee, endpoint adjudication committee, data management team, and other individuals or groups overseeing the trial, if applicable (see Item 21a for data monitoring committee)

*Described throughout paper*

10  
11

## Introduction

- 12  
13  
14  
15  
16  
17  
18  
19  
20  
21  
22
- Background and rationale 6a Description of research question and justification for undertaking the trial, including summary of relevant studies (published and unpublished) examining benefits and harms for each intervention

*Line 32-44*

- 6b Explanation for choice of comparators

*Lines 116-119*

- 23  
24  
25  
26  
27
- Objectives 7 Specific objectives or hypotheses

*Lines 45-47*

- 28  
29  
30  
31  
32  
33  
34
- Trial design 8 Description of trial design including type of trial (eg, parallel group, crossover, factorial, single group), allocation ratio, and framework (eg, superiority, equivalence, noninferiority, exploratory)

*Lines 49-51*

35  
36

## Methods: Participants, interventions, and outcomes

- 37  
38  
39  
40  
41  
42  
43
- Study setting 9 Description of study settings (eg, community clinic, academic hospital) and list of countries where data will be collected. Reference to where list of study sites can be obtained

*Lines 54-64*

- 44  
45  
46  
47  
48  
49  
50
- Eligibility criteria 10 Inclusion and exclusion criteria for participants. If applicable, eligibility criteria for study centres and individuals who will perform the interventions (eg, surgeons, psychotherapists)

*Lines 66-89*

- 51  
52  
53  
54  
55  
56  
57  
58  
59  
60
- Interventions 11a Interventions for each group with sufficient detail to allow replication, including how and when they will be administered

*Lines 91-118*

|    |             |     |                                                                       |
|----|-------------|-----|-----------------------------------------------------------------------|
| 1  |             |     |                                                                       |
| 2  |             | 11b | Criteria for discontinuing or modifying allocated interventions for a |
| 3  |             |     | given trial participant (eg, drug dose change in response to harms,   |
| 4  |             |     | participant request, or improving/worsening disease)                  |
| 5  |             |     |                                                                       |
| 6  |             |     | <i>Lines 119-121</i>                                                  |
| 7  |             |     |                                                                       |
| 8  |             | 11c | Strategies to improve adherence to intervention protocols, and any    |
| 9  |             |     | procedures for monitoring adherence (eg, drug tablet return,          |
| 10 |             |     | laboratory tests)                                                     |
| 11 |             |     |                                                                       |
| 12 |             |     | <i>Lines 309-317</i>                                                  |
| 13 |             |     |                                                                       |
| 14 |             | 11d | Relevant concomitant care and interventions that are permitted or     |
| 15 |             |     | prohibited during the trial                                           |
| 16 |             |     |                                                                       |
| 17 |             |     | <i>Not applicable</i>                                                 |
| 18 |             |     |                                                                       |
| 19 |             |     |                                                                       |
| 20 |             |     |                                                                       |
| 21 | Outcomes    | 12  | Primary, secondary, and other outcomes, including the specific        |
| 22 |             |     | measurement variable (eg, systolic blood pressure), analysis metric   |
| 23 |             |     | (eg, change from baseline, final value, time to event), method of     |
| 24 |             |     | aggregation (eg, median, proportion), and time point for each         |
| 25 |             |     | outcome. Explanation of the clinical relevance of chosen efficacy and |
| 26 |             |     | harm outcomes is strongly recommended                                 |
| 27 |             |     |                                                                       |
| 28 |             |     | <i>Lines 124-176</i>                                                  |
| 29 |             |     |                                                                       |
| 30 |             |     |                                                                       |
| 31 |             |     |                                                                       |
| 32 | Participant | 13  | Time schedule of enrolment, interventions (including any run-ins and  |
| 33 | timeline    |     | washouts), assessments, and visits for participants. A schematic      |
| 34 |             |     | diagram is highly recommended (see Figure)                            |
| 35 |             |     |                                                                       |
| 36 |             |     | <i>Figure 1</i>                                                       |
| 37 |             |     |                                                                       |
| 38 |             |     |                                                                       |
| 39 | Sample size | 14  | Estimated number of participants needed to achieve study objectives   |
| 40 |             |     | and how it was determined, including clinical and statistical         |
| 41 |             |     | assumptions supporting any sample size calculations                   |
| 42 |             |     |                                                                       |
| 43 |             |     | <i>Lines 184-198</i>                                                  |
| 44 |             |     |                                                                       |
| 45 |             |     |                                                                       |
| 46 | Recruitment | 15  | Strategies for achieving adequate participant enrolment to reach      |
| 47 |             |     | target sample size                                                    |
| 48 |             |     |                                                                       |
| 49 |             |     | <i>Lines 199-207</i>                                                  |
| 50 |             |     |                                                                       |

## Methods: Assignment of interventions (for controlled trials)

### Allocation:

|    |                                                           |     |                                                                             |
|----|-----------------------------------------------------------|-----|-----------------------------------------------------------------------------|
| 1  |                                                           |     |                                                                             |
| 2  | Sequence                                                  | 16a | Method of generating the allocation sequence (eg, computer-                 |
| 3  | generation                                                |     | generated random numbers), and list of any factors for stratification.      |
| 4  |                                                           |     | To reduce predictability of a random sequence, details of any planned       |
| 5  |                                                           |     | restriction (eg, blocking) should be provided in a separate document        |
| 6  |                                                           |     | that is unavailable to those who enrol participants or assign               |
| 7  |                                                           |     | interventions                                                               |
| 8  |                                                           |     |                                                                             |
| 9  |                                                           |     |                                                                             |
| 10 |                                                           |     | <i>Lines 209-211</i>                                                        |
| 11 |                                                           |     |                                                                             |
| 12 | Allocation                                                | 16b | Mechanism of implementing the allocation sequence (eg, central              |
| 13 | concealment                                               |     | telephone; sequentially numbered, opaque, sealed envelopes),                |
| 14 | mechanism                                                 |     | describing any steps to conceal the sequence until interventions are        |
| 15 |                                                           |     | assigned                                                                    |
| 16 |                                                           |     |                                                                             |
| 17 |                                                           |     |                                                                             |
| 18 |                                                           |     | <i>Lines 213-214</i>                                                        |
| 19 |                                                           |     |                                                                             |
| 20 | Implementation                                            | 16c | Who will generate the allocation sequence, who will enrol participants,     |
| 21 |                                                           |     | and who will assign participants to interventions                           |
| 22 |                                                           |     |                                                                             |
| 23 |                                                           |     |                                                                             |
| 24 |                                                           |     | <i>Line 211</i>                                                             |
| 25 |                                                           |     |                                                                             |
| 26 | Blinding                                                  | 17a | Who will be blinded after assignment to interventions (eg, trial            |
| 27 | (masking)                                                 |     | participants, care providers, outcome assessors, data analysts), and        |
| 28 |                                                           |     | how                                                                         |
| 29 |                                                           |     |                                                                             |
| 30 |                                                           |     |                                                                             |
| 31 |                                                           |     | <i>Not applicable (discussed as limitation)</i>                             |
| 32 |                                                           |     |                                                                             |
| 33 |                                                           | 17b | If blinded, circumstances under which unblinding is permissible, and        |
| 34 |                                                           |     | procedure for revealing a participant's allocated intervention during       |
| 35 |                                                           |     | the trial                                                                   |
| 36 |                                                           |     |                                                                             |
| 37 |                                                           |     |                                                                             |
| 38 |                                                           |     | <i>Not applicable</i>                                                       |
| 39 |                                                           |     |                                                                             |
| 40 | <b>Methods: Data collection, management, and analysis</b> |     |                                                                             |
| 41 |                                                           |     |                                                                             |
| 42 | Data collection                                           | 18a | Plans for assessment and collection of outcome, baseline, and other         |
| 43 | methods                                                   |     | trial data, including any related processes to promote data quality (eg,    |
| 44 |                                                           |     | duplicate measurements, training of assessors) and a description of         |
| 45 |                                                           |     | study instruments (eg, questionnaires, laboratory tests) along with         |
| 46 |                                                           |     | their reliability and validity, if known. Reference to where data           |
| 47 |                                                           |     | collection forms can be found, if not in the protocol                       |
| 48 |                                                           |     |                                                                             |
| 49 |                                                           |     |                                                                             |
| 50 |                                                           |     |                                                                             |
| 51 |                                                           |     | <i>Lines 142, 219-227</i>                                                   |
| 52 |                                                           |     |                                                                             |
| 53 |                                                           | 18b | Plans to promote participant retention and complete follow-up,              |
| 54 |                                                           |     | including list of any outcome data to be collected for participants who     |
| 55 |                                                           |     | discontinue or deviate from intervention protocols                          |
| 56 |                                                           |     |                                                                             |
| 57 |                                                           |     |                                                                             |
| 58 |                                                           |     | <i>Not applicable (since intervention always well documented and short-</i> |
| 59 |                                                           |     | <i>term and mortality data are expected to be very complete)</i>            |
| 60 |                                                           |     |                                                                             |

- 1  
2  
3  
4  
5  
6  
7  
8  
9  
10  
11  
12  
13  
14  
15  
16  
17  
18  
19  
20  
21  
22  
23  
24  
25  
26  
27  
28  
29  
30  
31  
32  
33  
34  
35  
36  
37  
38  
39  
40  
41  
42  
43  
44  
45  
46  
47  
48  
49  
50  
51  
52  
53  
54  
55  
56  
57  
58  
59  
60
- Data management 19 Plans for data entry, coding, security, and storage, including any related processes to promote data quality (eg, double data entry; range checks for data values). Reference to where details of data management procedures can be found, if not in the protocol
- Lines 229-244*
- Statistical methods 20a Statistical methods for analysing primary and secondary outcomes. Reference to where other details of the statistical analysis plan can be found, if not in the protocol
- Lines 263-276*
- 20b Methods for any additional analyses (eg, subgroup and adjusted analyses)
- Lines 282-305*
- 20c Definition of analysis population relating to protocol non-adherence (eg, as randomised analysis), and any statistical methods to handle missing data (eg, multiple imputation)
- Lines 247-261*
- Methods: Monitoring**
- Data monitoring 21a Composition of data monitoring committee (DMC); summary of its role and reporting structure; statement of whether it is independent from the sponsor and competing interests; and reference to where further details about its charter can be found, if not in the protocol. Alternatively, an explanation of why a DMC is not needed
- Lines 365-376*
- 21b Description of any interim analyses and stopping guidelines, including who will have access to these interim results and make the final decision to terminate the trial
- Lines 194, 277-281, 371-372*
- Harms 22 Plans for collecting, assessing, reporting, and managing solicited and spontaneously reported adverse events and other unintended effects of trial interventions or trial conduct
- Lines 172-179, 342-345*



1  
2 Auditing 23 Frequency and procedures for auditing trial conduct, if any, and  
3 whether the process will be independent from investigators and the  
4 sponsor  
5

6  
7 *Lines 318-340, 365-380*  
8

9 **Ethics and dissemination**

10  
11 Research ethics 24 Plans for seeking research ethics committee/institutional review board  
12 approval (REC/IRB) approval  
13

14  
15 *Lines 357-361*  
16

17 Protocol amendments 25 Plans for communicating important protocol modifications (eg,  
18 changes to eligibility criteria, outcomes, analyses) to relevant parties  
19 (eg, investigators, REC/IRBs, trial participants, trial registries, journals,  
20 regulators)  
21

22  
23 *Line 362.*  
24

25 Consent or assent 26a Who will obtain informed consent or assent from potential trial  
26 participants or authorised surrogates, and how (see Item 32)  
27

28  
29 *Not applicable (part of trial protocol and delegation lists, but too  
30 technical for manuscript)*  
31

32 26b Additional consent provisions for collection and use of participant data  
33 and biological specimens in ancillary studies, if applicable  
34

35  
36 *Not applicable*  
37

38 Confidentiality 27 How personal information about potential and enrolled participants will  
39 be collected, shared, and maintained in order to protect confidentiality  
40 before, during, and after the trial  
41

42  
43 *Not applicable (part of full protocol, but too technical and detailed for  
44 this manuscript).*  
45

46 Declaration of interests 28 Financial and other competing interests for principal investigators for  
47 the overall trial and each study site  
48

49  
50 *Not applicable (site contracts are confidential).*  
51

52 Access to data 29 Statement of who will have access to the final trial dataset, and  
53 disclosure of contractual agreements that limit such access for  
54 investigators  
55

56  
57 *Not applicable (not regulated contractually).*  
58  
59  
60

|    |                   |     |                                                                                  |
|----|-------------------|-----|----------------------------------------------------------------------------------|
| 1  |                   |     |                                                                                  |
| 2  | Ancillary and     | 30  | Provisions, if any, for ancillary and post-trial care, and for                   |
| 3  | post-trial care   |     | compensation to those who suffer harm from trial participation                   |
| 4  |                   |     |                                                                                  |
| 5  |                   |     | <i>Not applicable (insurance provided for all patients however).</i>             |
| 6  |                   |     |                                                                                  |
| 7  | Dissemination     | 31a | Plans for investigators and sponsor to communicate trial results to              |
| 8  | policy            |     | participants, healthcare professionals, the public, and other relevant           |
| 9  |                   |     | groups (eg, via publication, reporting in results databases, or other            |
| 10 |                   |     | data sharing arrangements), including any publication restrictions               |
| 11 |                   |     |                                                                                  |
| 12 |                   |     | <i>Lines 382-394</i>                                                             |
| 13 |                   |     |                                                                                  |
| 14 |                   | 31b | Authorship eligibility guidelines and any intended use of professional           |
| 15 |                   |     | writers                                                                          |
| 16 |                   |     | <i>Not applicable (will be decided within consortium at later date).</i>         |
| 17 |                   |     |                                                                                  |
| 18 |                   | 31c | Plans, if any, for granting public access to the full protocol, participant-     |
| 19 |                   |     | level dataset, and statistical code                                              |
| 20 |                   |     | <i>Not applicable (will be decided within consortium at later date).</i>         |
| 21 |                   |     |                                                                                  |
| 22 |                   |     |                                                                                  |
| 23 |                   |     |                                                                                  |
| 24 |                   |     |                                                                                  |
| 25 |                   |     |                                                                                  |
| 26 |                   |     |                                                                                  |
| 27 | <b>Appendices</b> |     |                                                                                  |
| 28 |                   |     |                                                                                  |
| 29 | Informed consent  | 32  | Model consent form and other related documentation given to                      |
| 30 | materials         |     | participants and authorised surrogates                                           |
| 31 |                   |     |                                                                                  |
| 32 |                   |     | <i>Not applicable (part of full protocol, but too technical and detailed for</i> |
| 33 |                   |     | <i>this manuscript).</i>                                                         |
| 34 |                   |     |                                                                                  |
| 35 |                   |     |                                                                                  |
| 36 | Biological        | 33  | Plans for collection, laboratory evaluation, and storage of biological           |
| 37 | specimens         |     | specimens for genetic or molecular analysis in the current trial and for         |
| 38 |                   |     | future use in ancillary studies, if applicable                                   |
| 39 |                   |     |                                                                                  |
| 40 |                   |     | <i>Not applicable (part of full protocol, but too technical and detailed for</i> |
| 41 |                   |     | <i>this manuscript).</i>                                                         |
| 42 |                   |     |                                                                                  |
| 43 |                   |     |                                                                                  |

---

\*It is strongly recommended that this checklist be read in conjunction with the SPIRIT 2013 Explanation & Elaboration for important clarification on the items. Amendments to the protocol should be tracked and dated. The SPIRIT checklist is copyrighted by the SPIRIT Group under the Creative Commons "[Attribution-NonCommercial-NoDerivs 3.0 Unported](https://creativecommons.org/licenses/by-nc-nd/3.0/)" license.
